# Supplementary material for: Photolysis of nitrophenols in gas phase and aqueous environment: a potential daytime source for atmospheric nitrous acid (HONO)
Source: Royal Society of Chemistry journal article supplement (doi:10.1039/d2ea00053a), 2022-11-10
Supplement: d2ea00053a1.pdf [file d2ea00053a1.pdf]

Supplementary Information for

## **Photolysis of Nitrophenols in Gas Phase and Aqueous Environment: A Potential Daytime Source for Atmospheric Nitrous Acid (HONO)**

Shaoxun Guo<sup>†</sup>, Hui Li<sup>\*,†</sup>

<sup>†</sup> Beijing Advanced Innovation Center for Soft Matter Science and Engineering, Beijing University of Chemical Technology, Beijing 100029, China

\* E-mail: [hli@mail.buct.edu.cn](mailto:hli@mail.buct.edu.cn)

### **Table of Contents**

|                                                                                |    |
|--------------------------------------------------------------------------------|----|
| S1. Supplementary Methodology .....                                            | 1  |
| S1.1 Kinetics Studies for Photolysis of 2-Nitrophenol in Gas Phase .....       | 1  |
| S1.2 Kinetics Studies for Photolysis of 4-Nitrophenol in Gas Phase .....       | 3  |
| S1.3 Kinetics Studies for HONO Formation from 4-Nitrophenol in Gas Phase ..... | 4  |
| S1.4 Kinetics Studies for Photolysis of 4-Nitrophenol in Aqueous Phase .....   | 5  |
| S1.5 Photo-absorptions Cross-sections Calculation .....                        | 7  |
| S2. Supplementary Figures .....                                                | 8  |
| S3. Supplementary Tables .....                                                 | 20 |
| S4. Cartesian Coordinates .....                                                | 34 |
| S5. Supporting References .....                                                | 71 |

## S1. Supplementary Methodology

### S1.1 Kinetics Studies for Photolysis of 2-Nitrophenol in Gas Phase

For gas-phase photolysis of 2-nitrophenol (2-NP), HONO and OH $\cdot$  originate from three isomers of 2-NP on T<sub>1</sub> state based on the previous discussions. Therefore, the kinetic model of gas-phase photolysis pathway for HONO and OH $\cdot$  formation from 2-NP are considered as follows:

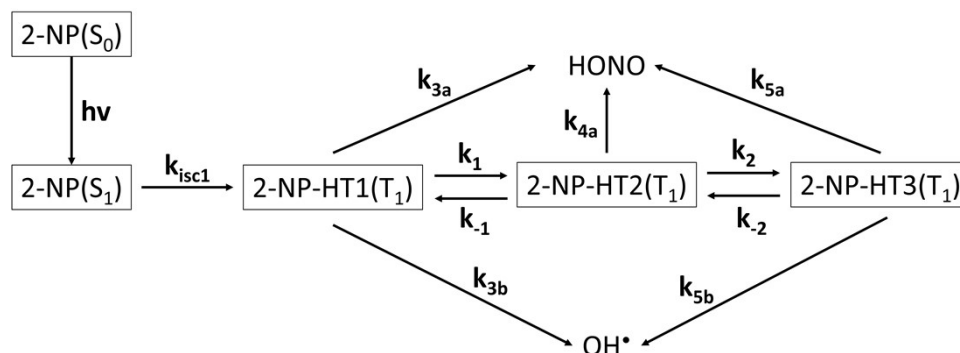

**Scheme S1.** Kinetics Model for photolysis reaction of 2-NP for HONO and OH $\cdot$  formation.

where HONO comes from the three isomers of aci-2-NP, while OH $\cdot$  only originates from two isomers. For each isomer on T<sub>1</sub> state, intersystem crossing to hopping back to S<sub>0</sub> state is available, in which the rate constants for 2-NP-HT1(T<sub>1</sub>), 2-NP-HT2(T<sub>1</sub>) and 2-NP-HT3(T<sub>1</sub>) are labelled as k<sub>isc2</sub>, k<sub>isc3</sub> and k<sub>isc4</sub>, respectively. The S<sub>1</sub>  $\rightarrow$  T<sub>1</sub> transition is not an ultrafast process (see Figure S15 for details), so this transition cannot be ignored in kinetics analysis, and we assume that the rate of ISC is a wavelength and temperature independent value.

In addition, we also investigate the effect of water molecules on the photolysis of 2NP. With the presence of water, the kinetic model is similar with the unimolecular reaction above, which is shown in Scheme S2. The rate constants of gas-phase photolysis from water-aci-2-NP complexes are marked as “w”. Here, we assume that 2-NP and water-2-NP complex have the same ISC rate from S<sub>1</sub> to T<sub>1</sub> due to the weak binding energy between two molecules.

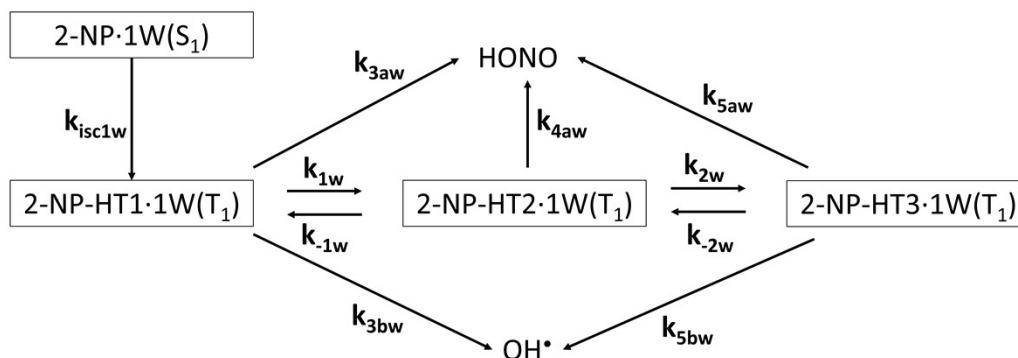

**Scheme S2.** Kinetics Model for photolysis reaction of water-2-NP hydrated complex for HONO and OH $\cdot$  formation.

For water-assisted reactions, the 2-NP forms a hydrated complex first, and the formation of water-2-NP complex can be regarded as an equilibrium, *i.e.*,

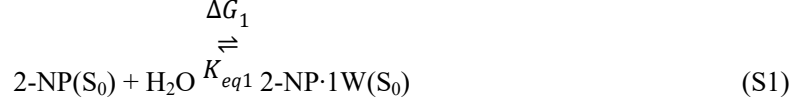

whose equilibrium constant,  $K_{\text{eq}1}$ , is written by

$$K_{\text{eq}1} = c^o \frac{[2\text{-NP}\cdot 1\text{W}]}{[\text{H}_2\text{O}][2\text{-NP}]} = \exp\left(-\frac{\Delta G_1}{RT}\right) \quad (\text{S2})$$

where  $\Delta G$  is the formation free energy of water-2-NP complex, and  $c^o$  is standard molar concentration (1mol/L).

Then, to evaluate the reaction rate of formation of HONO and OH· on  $T_1$  state, the micro-kinetics is implicated by solving the following differential rate equations to characterize the time-dependent variation of concentration of each specie:

$$\frac{d}{dt}[2\text{-NP}] = -k_{\text{isc}1}[2\text{-NP}](t) \quad (\text{S3})$$

$$\frac{d}{dt}[2\text{-NP-HT1}] = k_{\text{isc}1}[2\text{-NP}](t) - (k_{\text{isc}2} + k_{1+} + k_{3a} + k_{3b})[2\text{-NP-HT1}](t) + k_{-1}[2\text{-NP-HT2}](t) \quad (\text{S4})$$

$$\frac{d}{dt}[2\text{-NP-HT2}] = k_1[2\text{-NP-HT1}](t) - (k_{\text{isc}3} + k_{-1+} + k_{2+} + k_{4a})[2\text{-NP-HT2}](t) + k_{-2}[2\text{-NP-HT3}](t) \quad (\text{S5})$$

$$\frac{d}{dt}[2\text{-NP-HT3}] = k_2[2\text{-NP-HT2}](t) - (k_{\text{isc}4} + k_{-2+} + k_{5a} + k_{5b})[2\text{-NP-HT3}](t) \quad (\text{S6})$$

$$\frac{d}{dt}[\text{HONO}] = k_{3a}[2\text{-NP-HT1}](t) + k_{4a}[2\text{-NP-HT2}](t) + k_{5a}[2\text{-NP-HT3}](t) \quad (\text{S7})$$

$$\frac{d}{dt}[\text{OH}\cdot] = k_{3b}[2\text{-NP-HT1}](t) + k_{5b}[2\text{-NP-HT3}](t) \quad (\text{S8})$$

Moreover, the photolysis of water-2-NP has the similar issue:

$$\frac{d}{dt}[2\text{-NP}\cdot 1\text{W}] = -k_{\text{isc}1w}[2\text{-NP}\cdot 1\text{W}](t) \quad (\text{S9})$$

$$\begin{aligned} \frac{d}{dt}[2\text{-NP-HT1}\cdot 1\text{W}] = & \\ & k_{\text{isc}1w}[2\text{-NP}\cdot 1\text{W}](t) - (k_{\text{isc}2w} + k_{1w} + k_{3aw} + k_{3bw})[2\text{-NP-HT1}\cdot 1\text{W}](t) \\ & + k_{-1w}[2\text{-NP-HT2}\cdot 1\text{W}](t) \end{aligned} \quad (\text{S10})$$

$$\begin{aligned} \frac{d}{dt}[2\text{-NP-HT2}\cdot 1\text{W}] = & \\ & k_{1w}[2\text{-NP-HT1}\cdot 1\text{W}](t) - (k_{-1w} + k_{2w} + k_{4aw} + k_{\text{isc}3w})[2\text{-NP-HT2}\cdot 1\text{W}](t) \\ & + k_{-2w}[2\text{-NP-HT3}\cdot 1\text{W}](t) \end{aligned} \quad (\text{S11})$$

$$\frac{d}{dt}[2\text{-NP-HT3}\cdot 1\text{W}] = k_{2w}[2\text{-NP-HT2}\cdot 1\text{W}](t) - (k_{-2w} + k_{5aw} + k_{5bw} + k_{isc4w})[2\text{-NP-HT3}\cdot 1\text{W}](t) \quad (\text{S12})$$

$$\frac{d}{dt}[\text{HONO}] = k_{3aw}[2\text{-NP-HT1}\cdot 1\text{W}](t) + k_{4aw}[2\text{-NP-HT2}\cdot 1\text{W}](t) + k_{5aw}[2\text{-NP-HT3}\cdot 1\text{W}](t) \quad (\text{S13})$$

$$\frac{d}{dt}[\text{OH}\cdot] = k_{3b}[2\text{-NP-HT1}\cdot 1\text{W}](t) + k_{5b}[2\text{-NP-HT3}\cdot 1\text{W}](t) \quad (\text{S14})$$

In addition, the concentration of water molecules is relevant to the relative humidity (RH) and temperature, which is defined as

$$[\text{H}_2\text{O}] = \frac{10^{-3} N_A \text{RH} \% p_{\text{H}_2\text{O}}^*}{RT} (\text{molecules}\cdot\text{cm}^{-3}) \quad (\text{S15})$$

where  $p_{\text{H}_2\text{O}}^*$  is the equilibrium vapor pressure of water over a flat pure water surface at a given temperature ( $7.72 \times 10^{-2}$  kPa at 250 K and 3.57 kPa at 300 K, respectively), and  $N_A$  is the Avogadro's constant. The concentration of water vapors is about  $10^{15} \sim 10^{17}$  molecules $\cdot\text{cm}^{-3}$  ranging from 10% at 250 K to 100% RH at 300 K (Table S9). Such values are consistent with the previously reported data.<sup>11</sup> Due to the concentration of H<sub>2</sub>O being much larger than NPs, we do not consider the concentration changes of water molecules. The concentration of water in different RH are given in Table S9, and the time-dependent evolution of concentration of each product is shown in Figure S16.

## S1.2 Kinetics Studies for Photolysis of 4-Nitrophenol in Gas Phase

For gas-phase photolysis of 4-nitrophenol (4-NP), the NO<sub>2</sub> and NO originate from 4-NP on T<sub>1</sub> state based on the previous discussions. Therefore, the kinetic model of gas-phase photolysis pathway for NO<sub>2</sub> and NO formed from 4-NP are considered as the following individual paths:

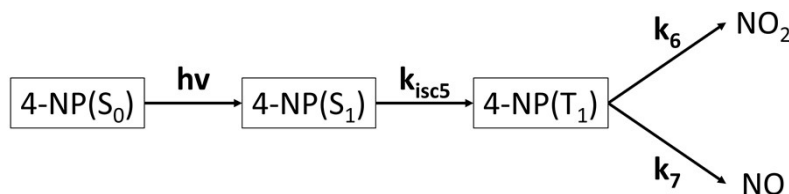

**Scheme S3.** Kinetics Model for photolysis reaction of 4-NP for NO<sub>2</sub> and NO formation in gas-phase.

In addition, with the presence of water, the rate constant of gas-phase photolysis from water-4-NP complexes can also obtain the similar kinetic model.

Then, similar with the discussion above, the micro-kinetics to evaluate the reaction rate of formation of NO<sub>2</sub> and NO formation is implicated by solving the following differential rate equations characterize the time-dependent variation of concentration of each specie:

$$\frac{d}{dt}[4\text{-NP}] = k_{isc5}[4\text{-NP}](t) \quad (\text{S16})$$

$$\frac{d}{dt}[4\text{-NP}(T_1)] = k_{isc5}[4\text{-NP}](t) - (k_{isc6} + k_6 + k_7)[4\text{-NP}(T_1)](t) \quad (\text{S17})$$

$$\frac{d}{dt}[\text{NO}_2] = k_6[4\text{-NP}(T_1)](t) \quad (\text{S18})$$

$$\frac{d}{dt}[\text{NO}] = k_7[4\text{-NP}(T_1)](t) \quad (\text{S19})$$

where  $k_{isc6}$  is rate constant the  $T_1 \rightarrow S_0$  transition at the minimum of  $T_1$  surface of 4-NP. The related data and calculated results are shown in Figure S17 and Table S6, S12.

### S1.3 Kinetics Studies for HONO Formation from 4-Nitrophenol in Gas Phase

Gas-phase HONO formation from 4-NP can be regarded as after the removal of 4-NP, and with the addition of water or oxygen molecules. The reaction routes are in the following thermal reactions:

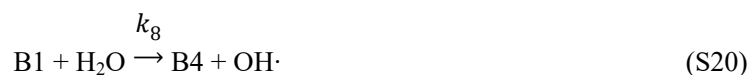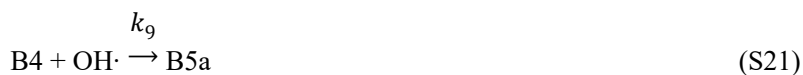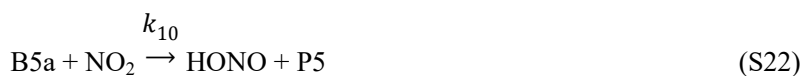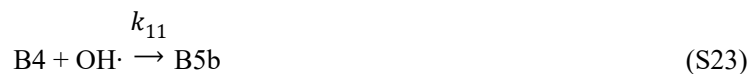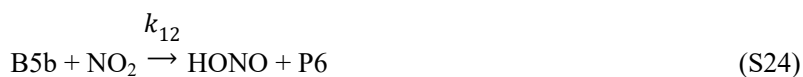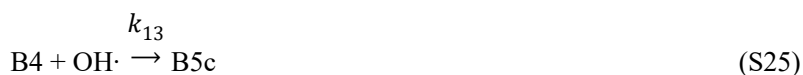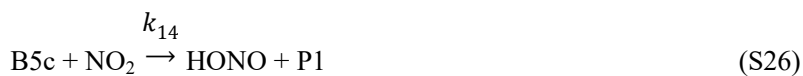

where  $k_8, k_9, k_{11}, k_{13}$  are the adiabatic rate constants, while  $k_{10}, k_{12}, k_{14}$  are the non-adiabatic rate constants. To obtain the quantum yields of HONO initiated from the gas-phase photolysis of 4-NP, the following differential rate equations characterize the time-dependent variation of concentration of HONO is solved:

$$\frac{d}{dt}[\text{B1}] = -k_8[4\text{-NP}] \cdot [\text{H}_2\text{O}] \quad (\text{S27})$$

$$\frac{d}{dt}[\text{B4}] = \frac{d}{dt}[\text{OH}\cdot] = k_8[4\text{-NP}] \cdot [\text{H}_2\text{O}] - (k_9 + k_{11} + k_{13})[\text{B4}] \cdot [\text{OH}\cdot] \quad (\text{S28})$$

$$\frac{d}{dt}[\text{B5a}] = k_9[\text{B4}] \cdot [\text{OH}\cdot] - k_{10}[\text{B5a}] \cdot [\text{NO}_2] \quad (\text{S29})$$

$$\frac{d}{dt}[\text{B5b}] = k_{11}[\text{B4}] \cdot [\text{OH}\cdot] - k_{12}[\text{B5b}] \cdot [\text{NO}_2] \quad (\text{S30})$$

$$\frac{d}{dt}[\text{B5c}] = k_{13}[\text{B4}] \cdot [\text{OH}\cdot] - k_{14}[\text{B5c}] \cdot [\text{NO}_2] \quad (\text{S31})$$

$$\frac{d}{dt}[\text{HONO}] = (k_{10}[\text{B5a}] + k_{12}[\text{B5b}] + k_{14}[\text{B5c}]) \cdot [\text{NO}_2] \quad (\text{S32})$$

The initial concentration/population of B1 is obtained from the previous micro-kinetics analysis, which is shown in Figure S17. Here, we use the concentration/population of B1 generated under the 80 kcal/mol irradiation ( $2.16 \times 10^{-2}$ ) and study the HONO formation under the relative humidity of 10%, 30%, 50%, 70%, 90% and 100% at 250 K and 300 K. The quantum yields of HONO are shown in Figure S18.

### S1.4 Kinetics Studies for Photolysis of 4-Nitrophenol in Aqueous Phase

For aqueous-phase (or air-water interfaces) photolysis of 4-NP, the  $\text{NO}_2$ , NO and HONO originate from 4-NP on  $T_1$  state based on the previous discussions. Therefore, the kinetic model of aqueous-phase photolysis pathway for  $\text{NO}_2$ , NO and HONO formation from 4-NP are considered as follows:

Path I:

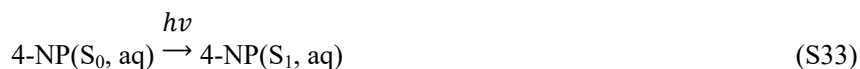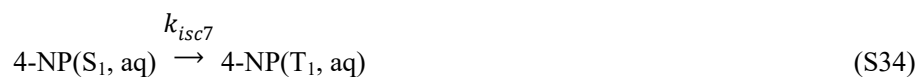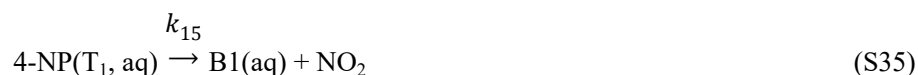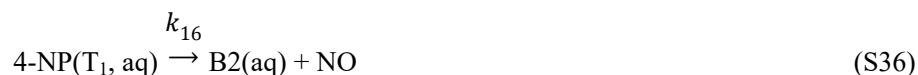

Path II:

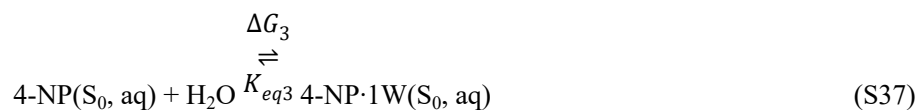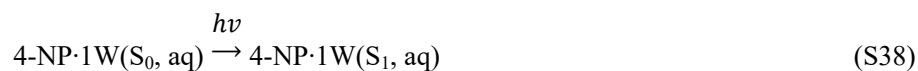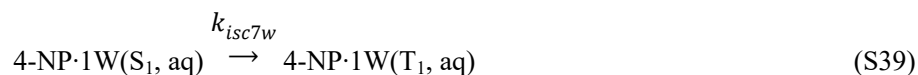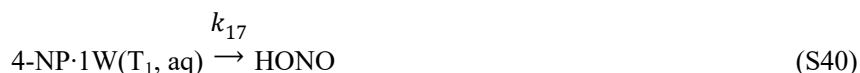

Path III:

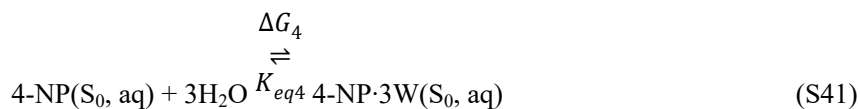

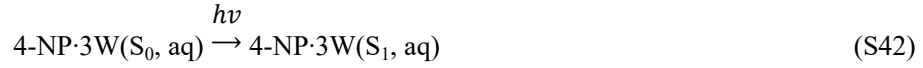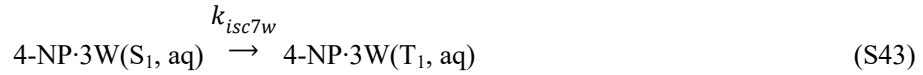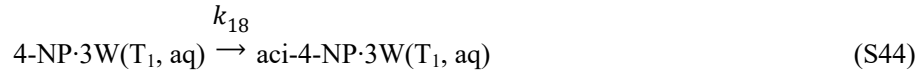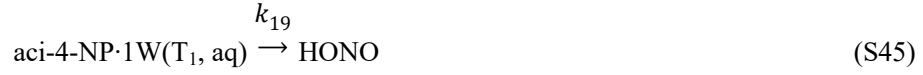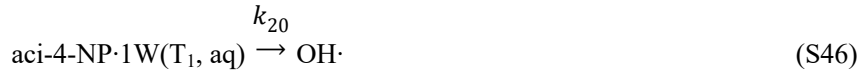

In these cases, the  $\text{NO}_2$  and  $\text{NO}$  formation are unimolecular reaction, while the  $\text{HONO}$  formation requires the participation of water vapors for both bimolecular reactions of 4-NP and unimolecular photolysis of aci-4-NP. Here, we calculated the kinetics of the photolysis reaction of 4-NP in solution under 100% humidity conditions which represents the concentration of water molecules at the air-water interface. The time-dependent variation of concentration of each species are computed as follows:

Path I:

$$\frac{d}{dt}[4\text{-NP}] = -k_{isc7}[4\text{-NP}](t) \quad (\text{S47})$$

$$\frac{d}{dt}[4\text{-NP}(\text{T}_1, \text{aq})] = k_{isc7}[4\text{-NP}](t) - (k_{15} + k_{16} + k_{isc8})[4\text{-NP}(\text{T}_1, \text{aq})] \quad (\text{S48})$$

$$\frac{d}{dt}[\text{NO}_2] = k_{15}[4\text{-NP}(\text{T}_1)](t) \quad (\text{S49})$$

$$\frac{d}{dt}[\text{NO}] = k_{16}[4\text{-NP}(\text{T}_1)](t) \quad (\text{S50})$$

Path II:

$$\frac{d}{dt}[4\text{-NP}\cdot 1\text{W}] = -k_{isc7w}[4\text{-NP}\cdot 1\text{W}](t) \quad (\text{S51})$$

$$\frac{d}{dt}[4\text{-NP}\cdot 1\text{W}(\text{T}_1, \text{aq})] = k_{isc7w}[4\text{-NP}\cdot 1\text{W}](t) - (k_{17} + k_{isc9})[4\text{-NP}\cdot 1\text{W}(\text{T}_1, \text{aq})] \quad (\text{S52})$$

$$\frac{d}{dt}[\text{HONO}] = k_{17}[4\text{-NP}\cdot 1\text{W}(\text{T}_1, \text{aq})](t) \quad (\text{S53})$$

Path III:

$$\frac{d}{dt}[4\text{-NP}\cdot 3\text{W}] = -k_{isc7w}[4\text{-NP}\cdot 3\text{W}](t) \quad (\text{S54})$$

$$\frac{d}{dt}[4\text{-NP}\cdot 3\text{W}(\text{T}_1, \text{aq})] = k_{isc7w}[4\text{-NP}\cdot 3\text{W}](t) - (k_{18} + k_{isc10})[4\text{-NP}\cdot 3\text{W}(\text{T}_1, \text{aq})] \quad (\text{S55})$$

$$\frac{d}{dt}[\text{aci-4-NP}\cdot 3\text{W}(\text{T}_1, \text{aq})] = k_{18}[4\text{-NP}\cdot 3\text{W}(\text{T}_1, \text{aq})] - (k_{19} + k_{20} + k_{isc11})[\text{aci-4-NP}\cdot 3\text{W}(\text{T}_1, \text{aq})] \quad (\text{S56})$$

$$\frac{d}{dt}[\text{HONO}] = k_{19}[\text{aci-4-NP}\cdot\text{3W}(\text{T}_1, \text{aq})](t) \quad (\text{S57})$$

where  $k_{isc8}$ ,  $k_{isc9}$ , and  $k_{isc10}$  is rate constant the  $\text{T}_1 \rightarrow \text{S}_0$  transition at the minimum of  $\text{T}_1$  surface of 4-NP, 4-NP·1W and 4-NP·3W with the SMD solvation model. To be noticed that the aci-4-NP·3W and aci-4-NP·1W can regard as have the same concentration. The time-dependent evolution of concentration of each product is shown in Figure S19.

### S1.5 Photo-absorptions Cross-sections Calculation

The photo-absorption cross-sections are computed with the nuclear ensemble approach (NEA)<sup>1-2</sup> in combination with the TDDFT, performed with the Gaussian 09 software as implemented in the Newton-X package.<sup>3-4</sup> In NEA, the configurations are sampled via the Wigner distributions of a set of independent harmonic potentials, which represent the normal modes under the optimized geometry of the ground state. The corresponding Wigner distribution at 250K and 300K is considered for the sampling. Excitation energies  $\Delta E_{0n}(q_i)$  and oscillator strengths  $f_{0n}(q_i)$  of the  $n^{\text{th}}$  excited state are computed for each sampled configuration  $q_i$ . Then, the photo-absorption cross-section is defined as (in atomic units)<sup>5</sup>

$$\sigma(E) = \frac{\pi e^2 \gamma}{2mc\epsilon_0 \hbar} \sum_{l \neq i}^{N_{fs}} \left[ \frac{1}{N_p^l} \sum_k^{N_p^l} f_{il}(R_k) g(E - \Delta E_{il}(R_k), \delta) \right] \quad (\text{S58})$$

where the phenomenological line profile  $g$  is represented by a normalized Gaussian line shape function centered at each excitation energy  $\Delta E_{0n}(q_i)$  with the linewidth of  $\delta = 0.1$  eV, which is large enough to suppress the artificial swell of the cross-section curve and small enough to maintain the actual overall shape, and  $\gamma$  is given by<sup>6</sup>

$$\gamma = 1 - \exp\left(-\frac{\Delta E}{k_B T}\right) \quad (\text{S59})$$



## S2. Supplementary Figures

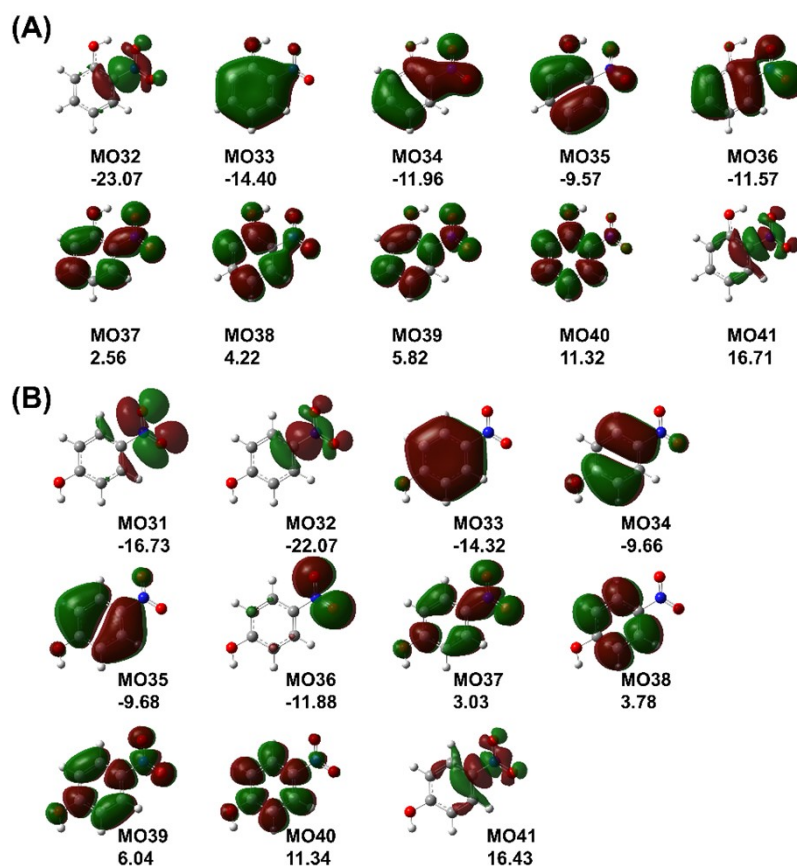

**Figure S1.** Active-space orbitals used in CASSCF and CASPT2 calculation for (A) 2-nitrophenol and (B) 4-nitrophenol. Each CASPT2 orbital energy (unit: eV) is listed below.

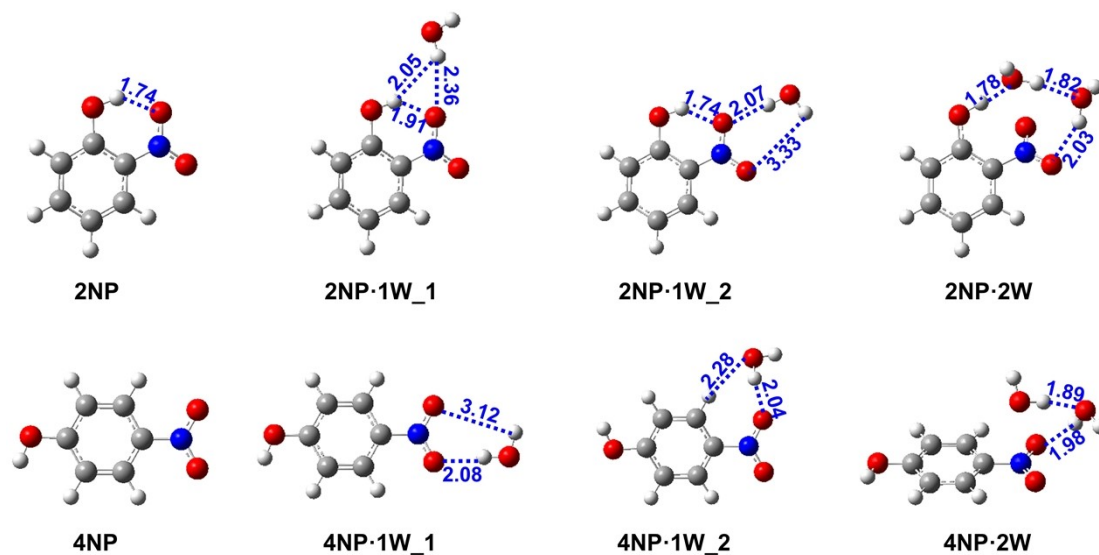

**Figure S2.** B3LYP/6-311++G(d,p) optimized structures of water-NP hydrated complexes, and the intermolecular distances are also shown (in Å).

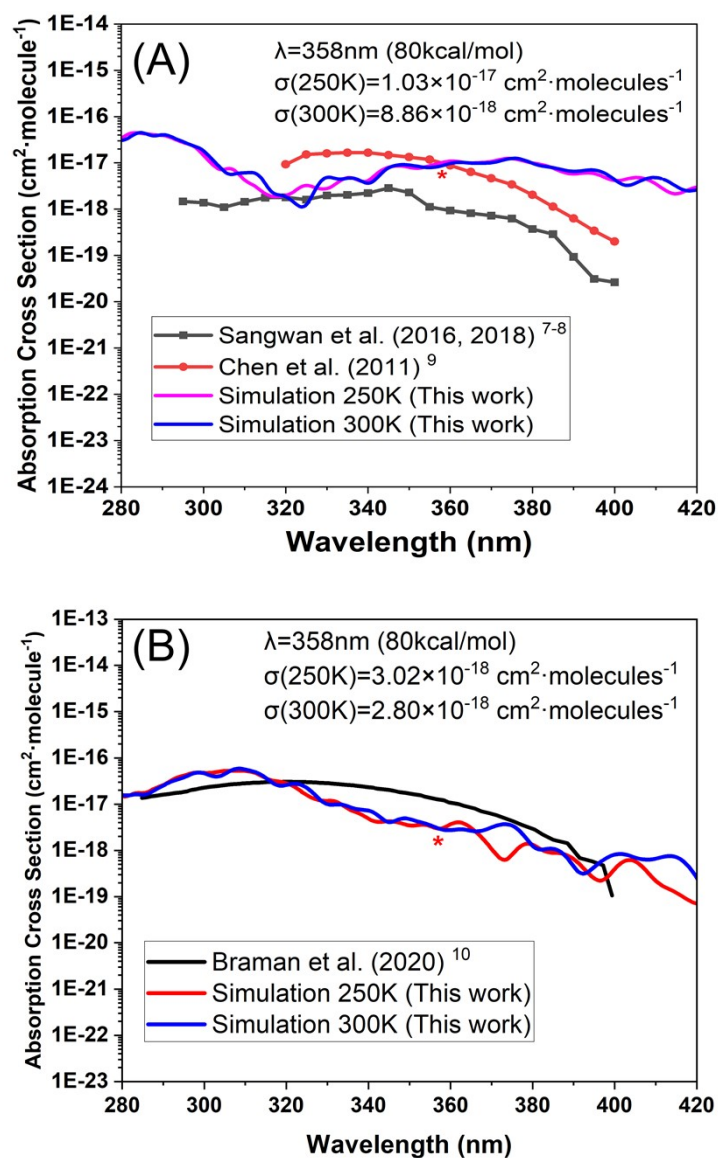

**Figure S3.** Computed photo-absorption cross-sections (in a unit of  $\text{cm}^2 \cdot \text{molecules}^{-1}$ ) of (A) 2-NP and (B) 4-NP using the nuclear ensemble approach (NEA) in combination with the time-dependent density functional theory calculation at TD-B3LYP/6-311++G(d,p) level of theory. The value of photo-absorption cross-section of 250K and 300K under 358 nm ( $E = 80$  kcal/mol) wavelength of light are marked on the figure.

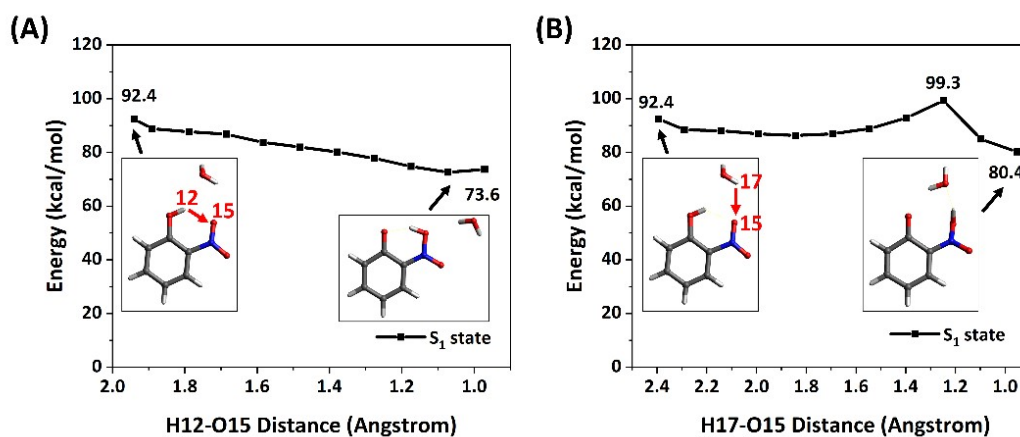

**Figure S4.** Computed potential energy surfaces (CASPT2//CASSCF/def2-TZVPP) of (A) intramolecular and (B) water-assisted intermolecular excited-state hydrogen transfer of water-2-nitrophenol complex on the  $S_1$  state.

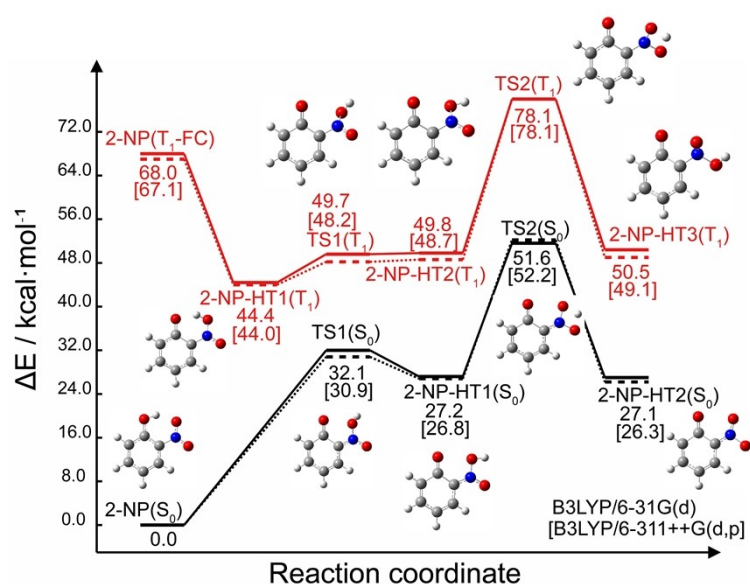

**Figure S5.** Computed unimolecular hydrogen transfer reaction pathways (at B3LYP/6-311++G(d,p) level) of 2-NP molecule along  $S_0$  and  $T_1$  potential energy surface. The molecular geometries are also shown in the Figure. All the energies are including ZPE correction of each optimized structures. See text for discussions.

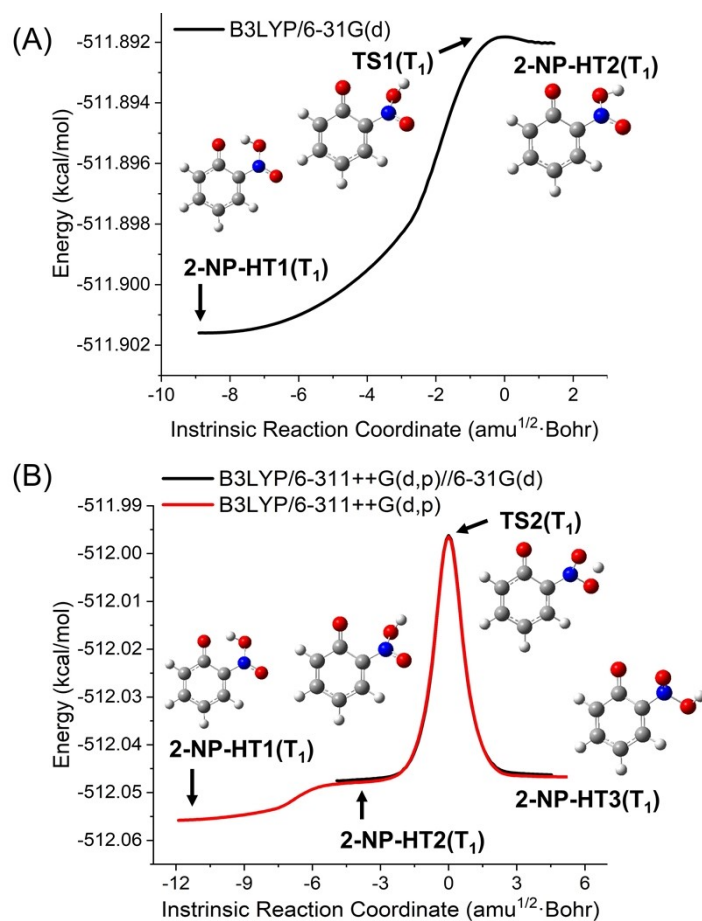

**Figure S6.** Intrinsic reaction coordinate (IRC) profile for isomerization of 2-NP on  $T_1$  state. The energies are calculated at B3LYP/6-31G(d) and B3LYP/6-311++G(d,p) level.

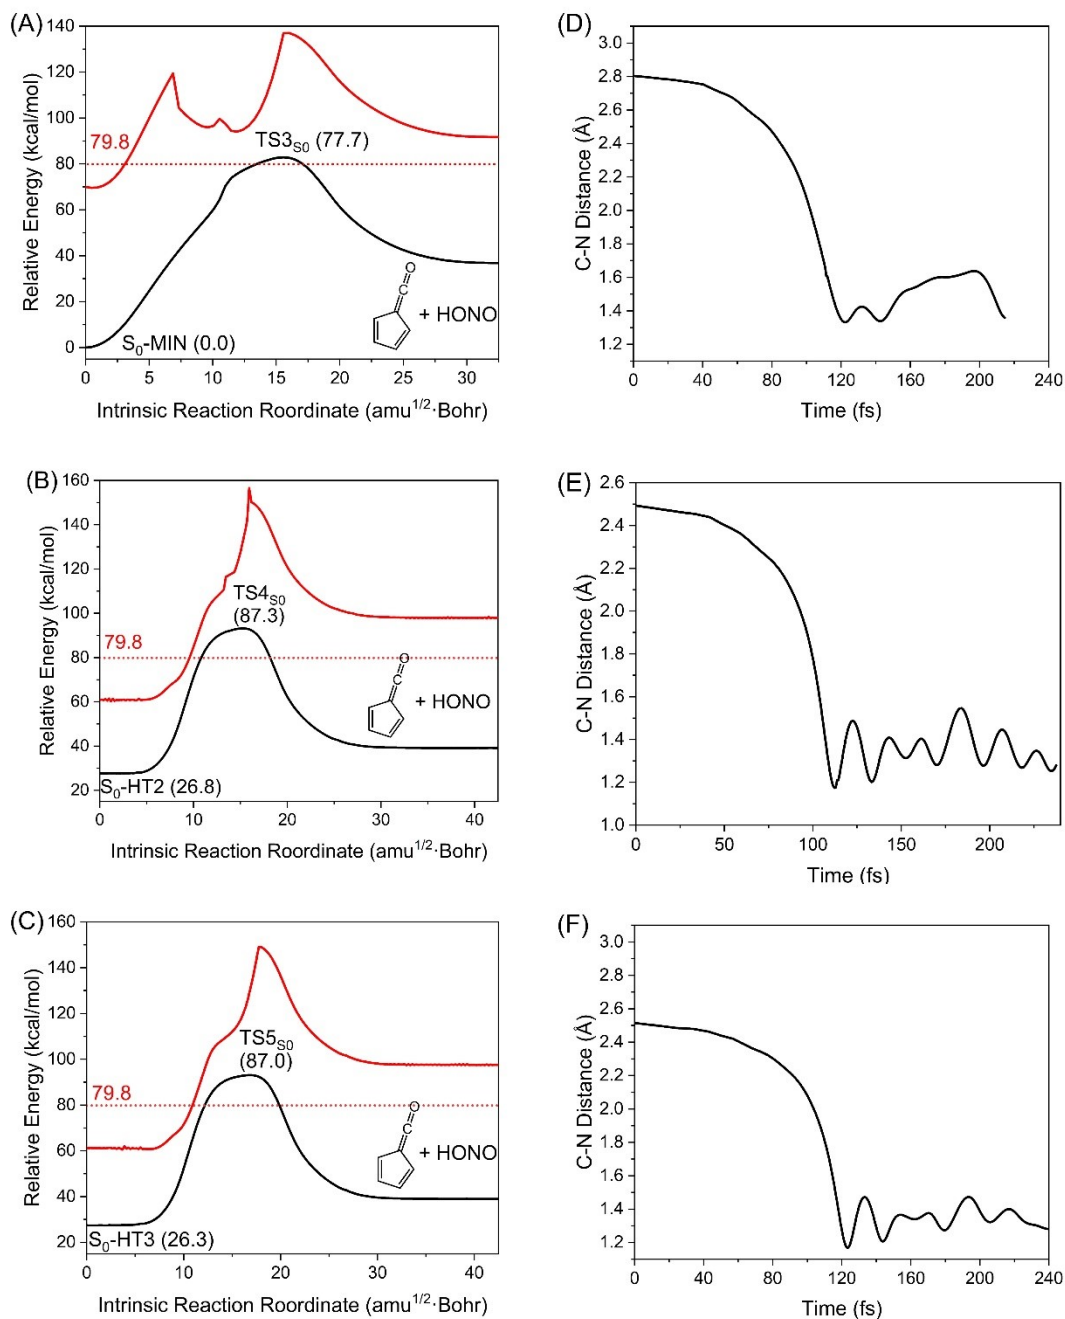

**Figure S7.** Computed unimolecular C-N dissociation reaction pathways (at B3LYP/6-311++G(d,p) level) of (A) 2-NP, (B) 2-NP-HT2, and (C) 2-NP-HT3 along  $S_0$  potential energy surface for HONO formation. The red dash line refers to the vertical excitation energy of  $S_1$  state in the photolysis. The red and black solid lines stand for energies of  $T_1$  and  $S_0$  state, respectively. The numbers in parentheses indicate the energies of the optimized structures including ZPE correction. (D) ~ (F) represents the distances between the C-N bond length (in Å) of 2-NP, 2-NP-HT2, and 2-NP-HT3 are plotted as function of time for BOMD trajectories starting from the transition state in the IRC calculations, respectively. See text for discussions.

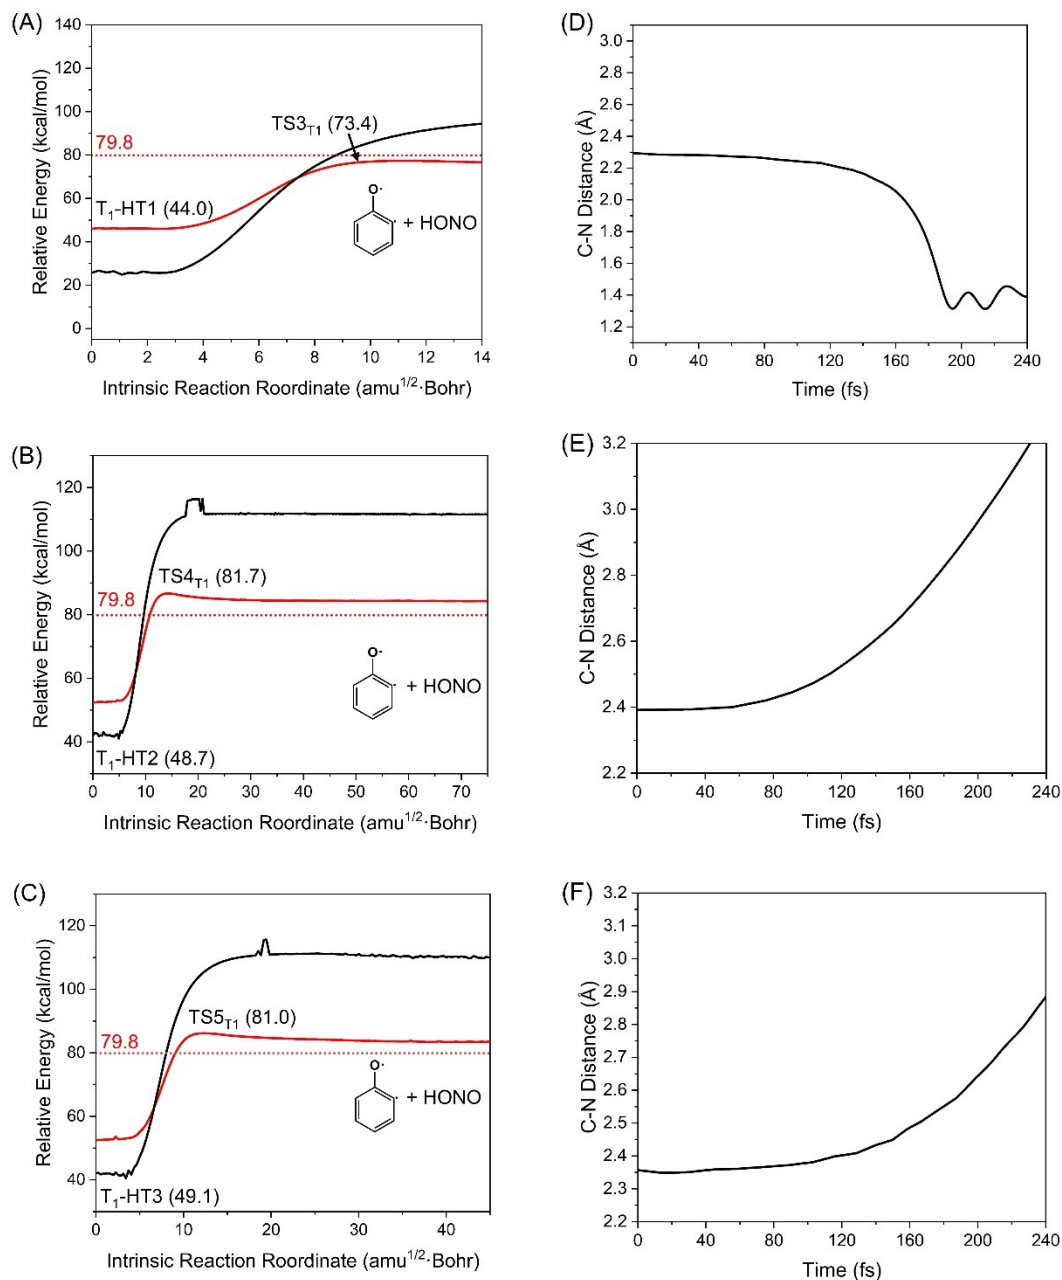

**Figure S8.** Computed unimolecular C-N dissociation reaction pathways (at B3LYP/6-311++G(d,p) level) of (A) 2-NP-HT1, (B) 2-NP-HT2, and (C) 2-NP-HT3 along T<sub>1</sub> potential energy surface for HONO formation. The red dash line refers to the vertical excitation energy of the S<sub>1</sub> state in the photolysis. The red and black solid lines stand for energies of T<sub>1</sub> and S<sub>0</sub> state, respectively. The numbers in parentheses indicate the energies of the optimized structures including ZPE correction. (D) ~ (F) represents the distances between the C-N bond length (in) of 2-NP-HT1, 2-NP-HT2, and 2-NP-HT3 are plotted as functions of time for BOMD trajectories starting from the transition states in the IRC calculations, respectively. See text for discussions.



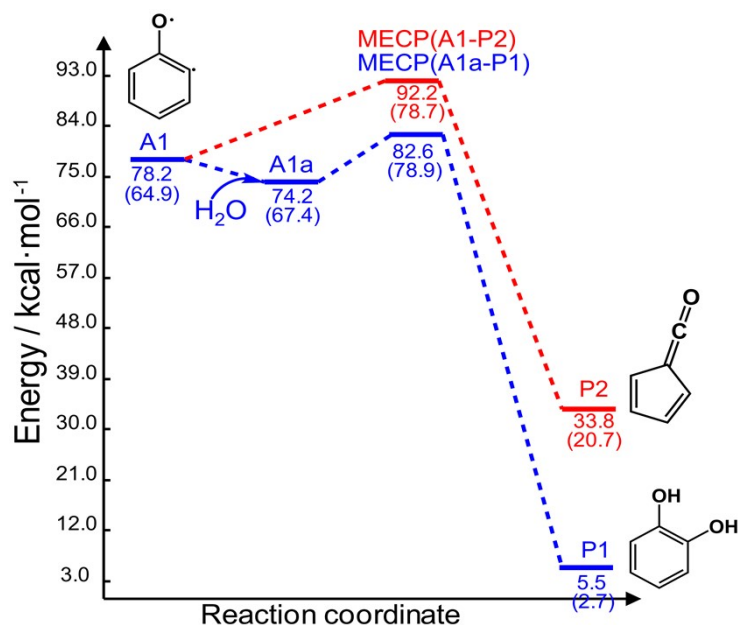

**Figure S9.** Computed reaction pathways (at B3LYP/6-311++G(d,p) level) for further reaction of catechol formation from the triplet biradical (A1) formed from the photolysis of 2-NP in the presence of water. The ZPE correction is included in the energy values of  $\Delta E$ .

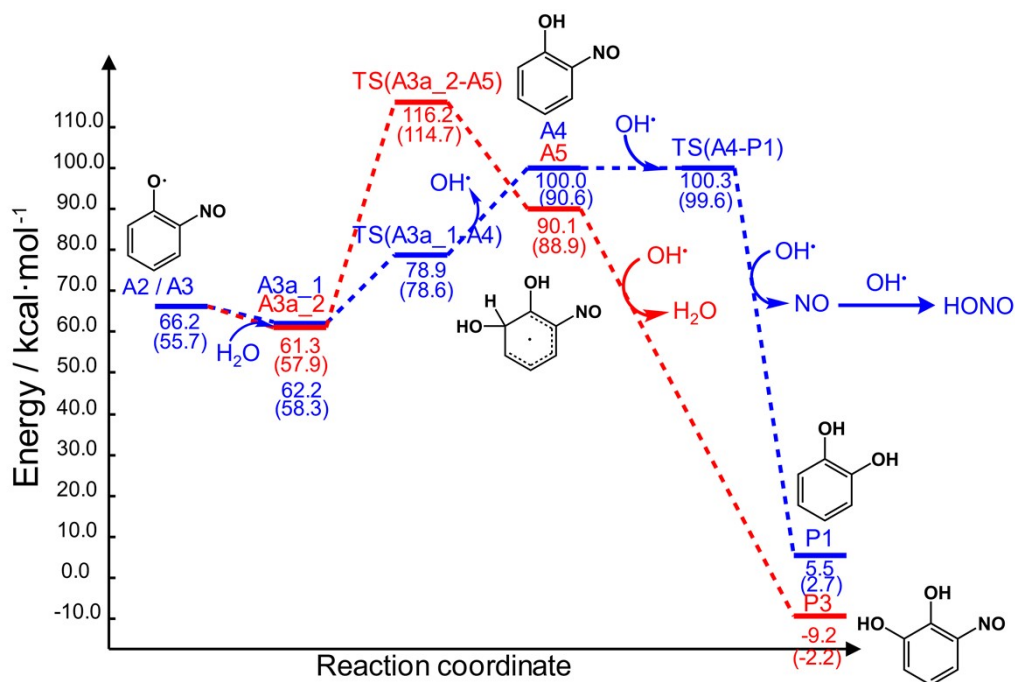

**Figure S10.** Computed reaction pathways (at B3LYP/6-311++G(d,p) level) for further reaction from the radical (A2&A3) formed from the photolysis of 2-NP in the presence of water. The ZPE correction is included in the energy values of  $\Delta E$ .

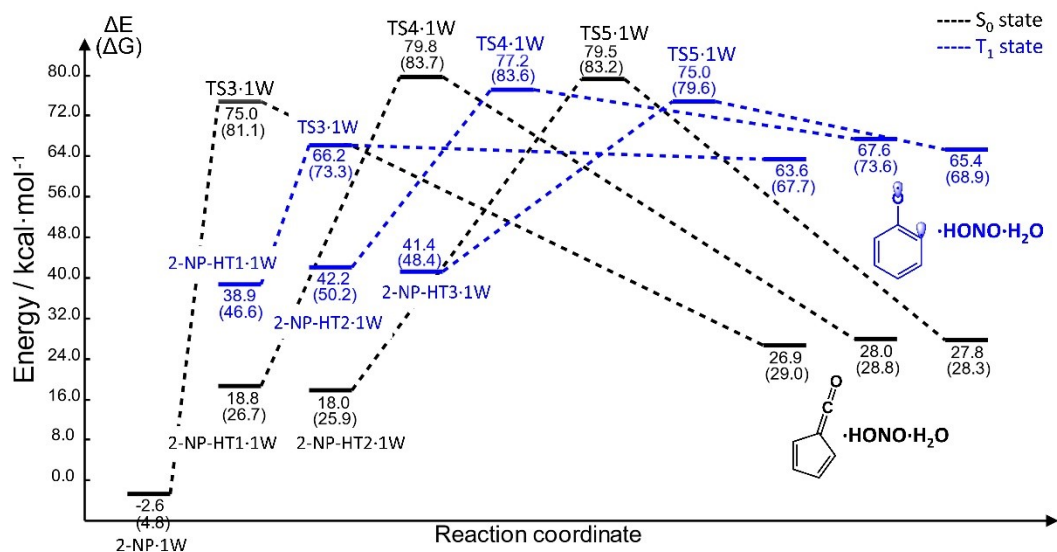

**Figure S11.** Computed water-assisted C-N dissociation reaction pathways (at B3LYP/6-311++G(d,p) level) of 2-NP and aci-2-NP along the  $S_0$  and  $T_1$  potential energy surfaces for HONO formation. The blue and black solid lines stand for energies of the  $T_1$  and  $S_0$  states, respectively. The numbers in parentheses denote the energies of the optimized structures including ZPE correction.

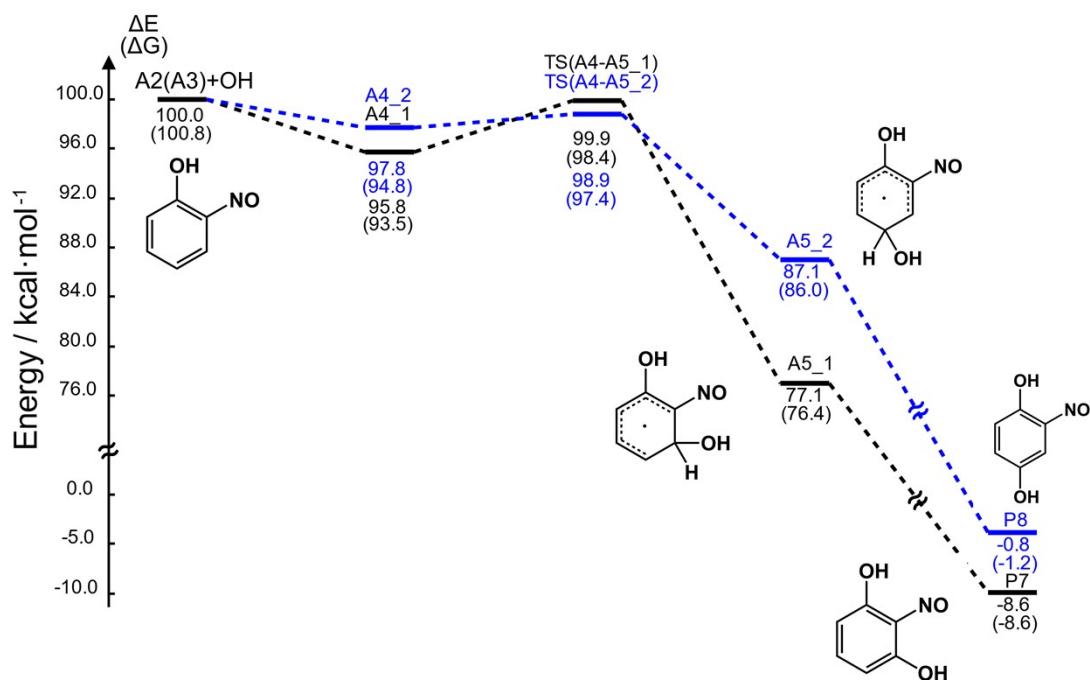

**Figure S12.** Computed reaction pathways (at B3LYP/6-311++G(d,p) level) for oxidation of 2-Nitrosophenol (A2&A3) by  $\text{OH}\cdot$  formed from the photolysis of 2-NP in presence of vicinal water, leading to the formation of 2-nitrosobenzene-diols. The ZPE correction is included in the energy values of  $\Delta E$ .



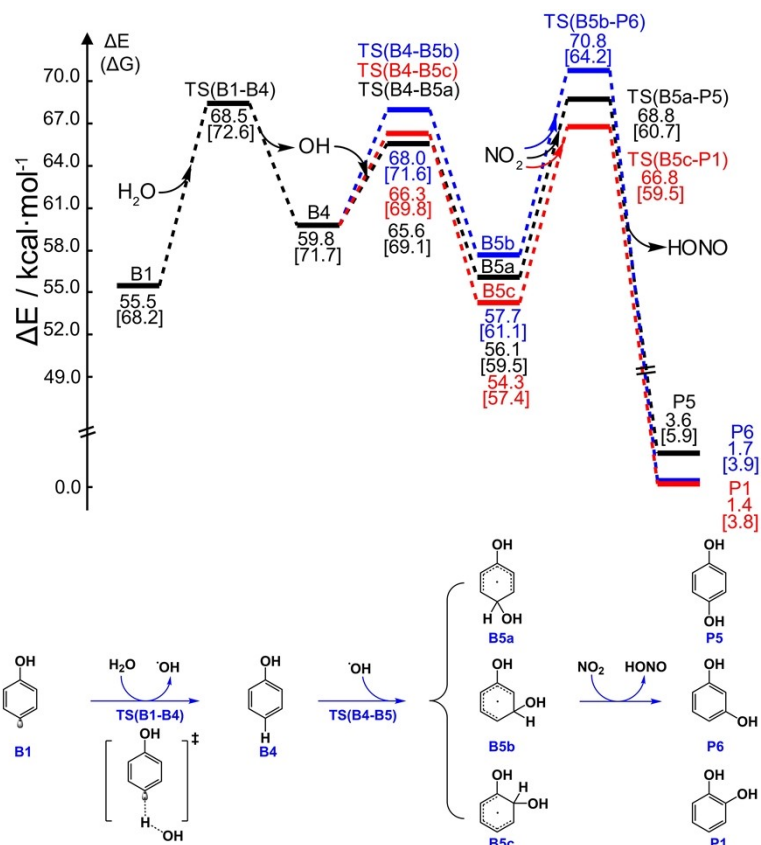

**Figure S13.** Computed reaction pathways (at B3LYP/6-311++G(d,p) level) for the fate of B1 radical intermediate formed from the photolysis of 4-NP in the presence of water, leading to the formation of HONO and benzene-diols. The ZPE correction is included in the energy values of  $\Delta E$ . See text for discussions.

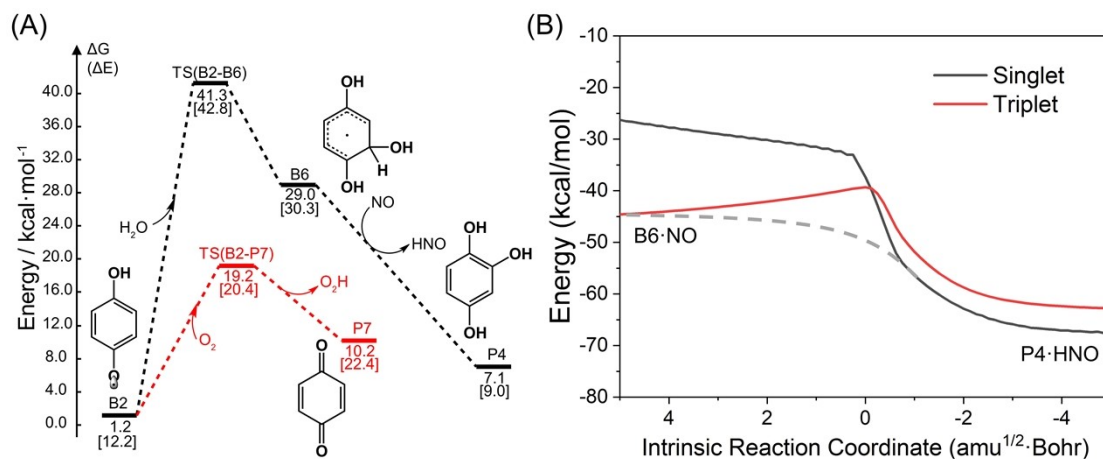

**Figure S14.** (A) Computed reaction pathways (at B3LYP/6-311++G(d,p) level) for the fate of B2 radical formed from the photolysis of 4-NP in the presence of water. The ZPE correction is included in the energy values of  $\Delta E$ . (B) The intrinsic reaction coordinate (IRC) of singlet and triplet state for hydrogen transfer between B6 and NO fragments.

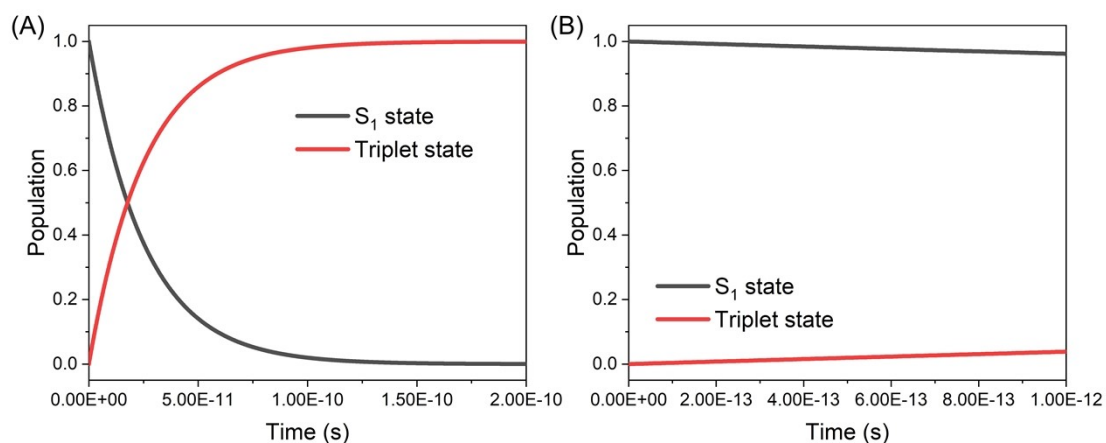

**Figure S15.** Micro-kinetics for intersystem crossing (ISC) reaction of 2-NP based on the microcanonical rate constants: (A) kinetics with 100% conversion; (B) kinetics within 1 ps.

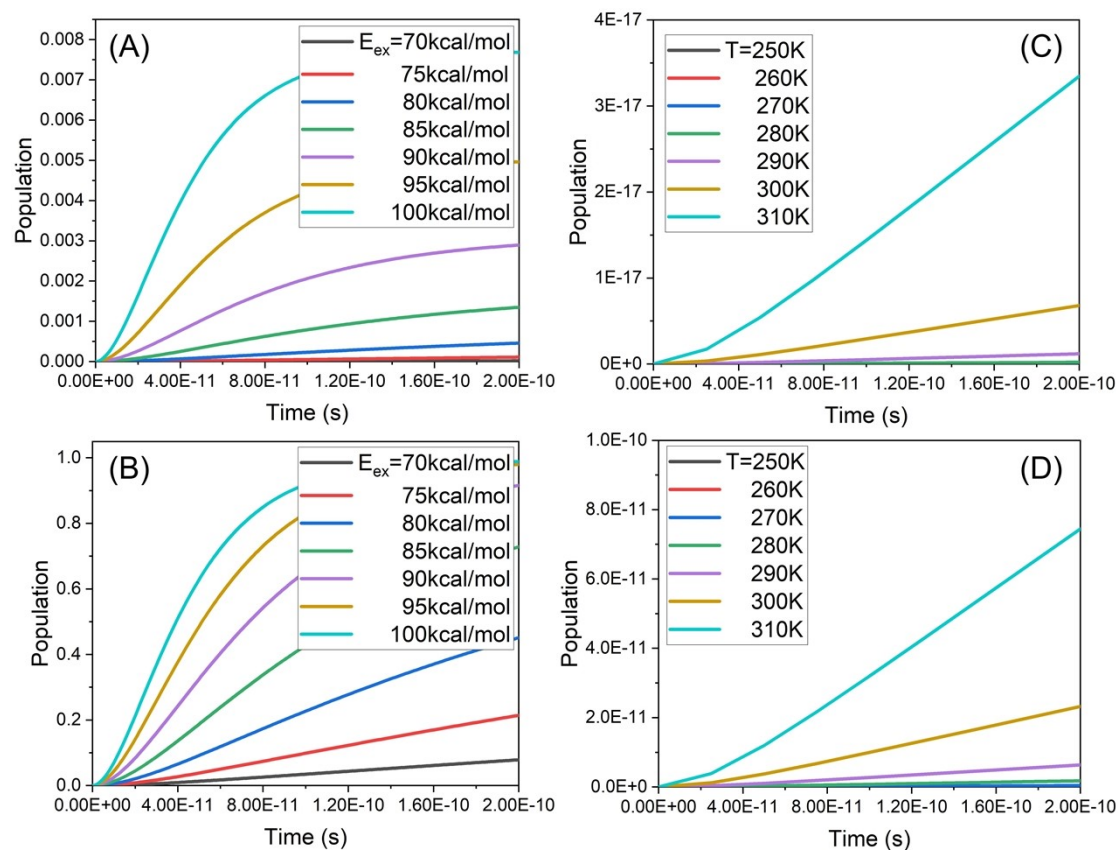

**Figure S16.** Micro-kinetics for photolysis of 2-NP based on the microcanonical rate constants for (A) HONO and (B) OH· formation as the function of excitation energy of 70 ~ 100 kcal/mol; temperature-dependent micro-kinetics for photolysis pathways of (C) HONO and (D) OH· formation based on the canonical rate constant.

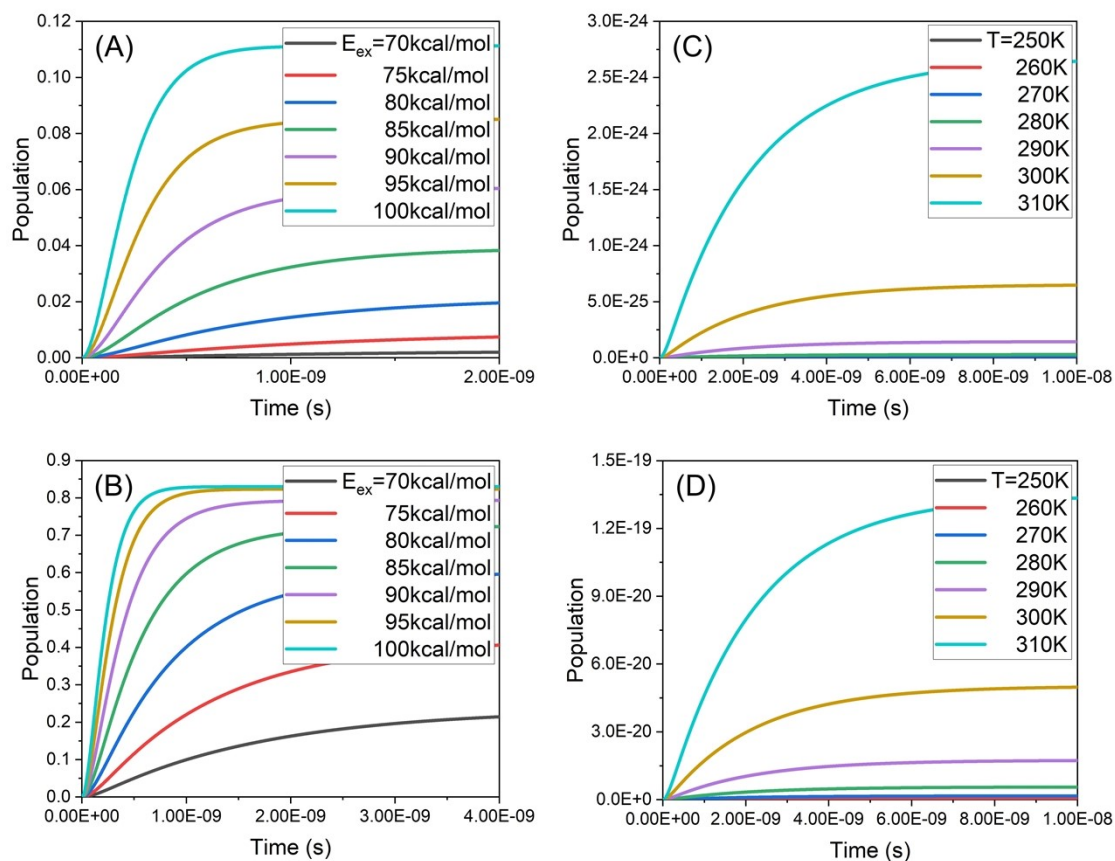

**Figure S17.** Micro-kinetics for gas-phase photolysis of 4-NP based on the microcanonical rate constants for (A)  $NO_2$  and (B)  $NO$  formation as the function of excitation energy of 70 ~ 100 kcal/mol; temperature-dependent micro-kinetics for photolysis pathways of (C)  $NO_2$  and (D)  $NO$  formation based on the canonical rate constant.

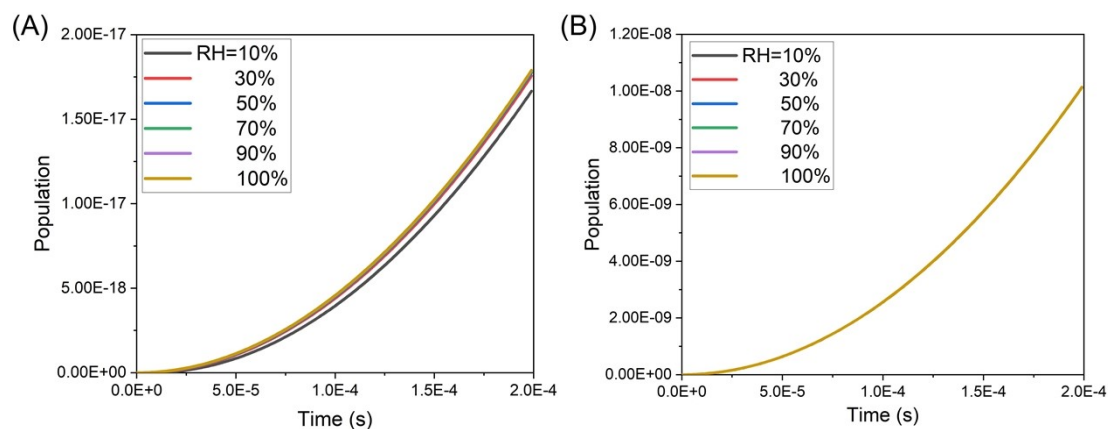

**Figure S18.** Micro-kinetics for HONO formation from B1 radical intermediate with  $NO_2$  in the presence of water with various relative humidity at (A) 250K and (B) 300K. The initial concentration of B1 and  $NO_2$  are taken from the results of the photolysis under the 80 kcal/mol irradiation.

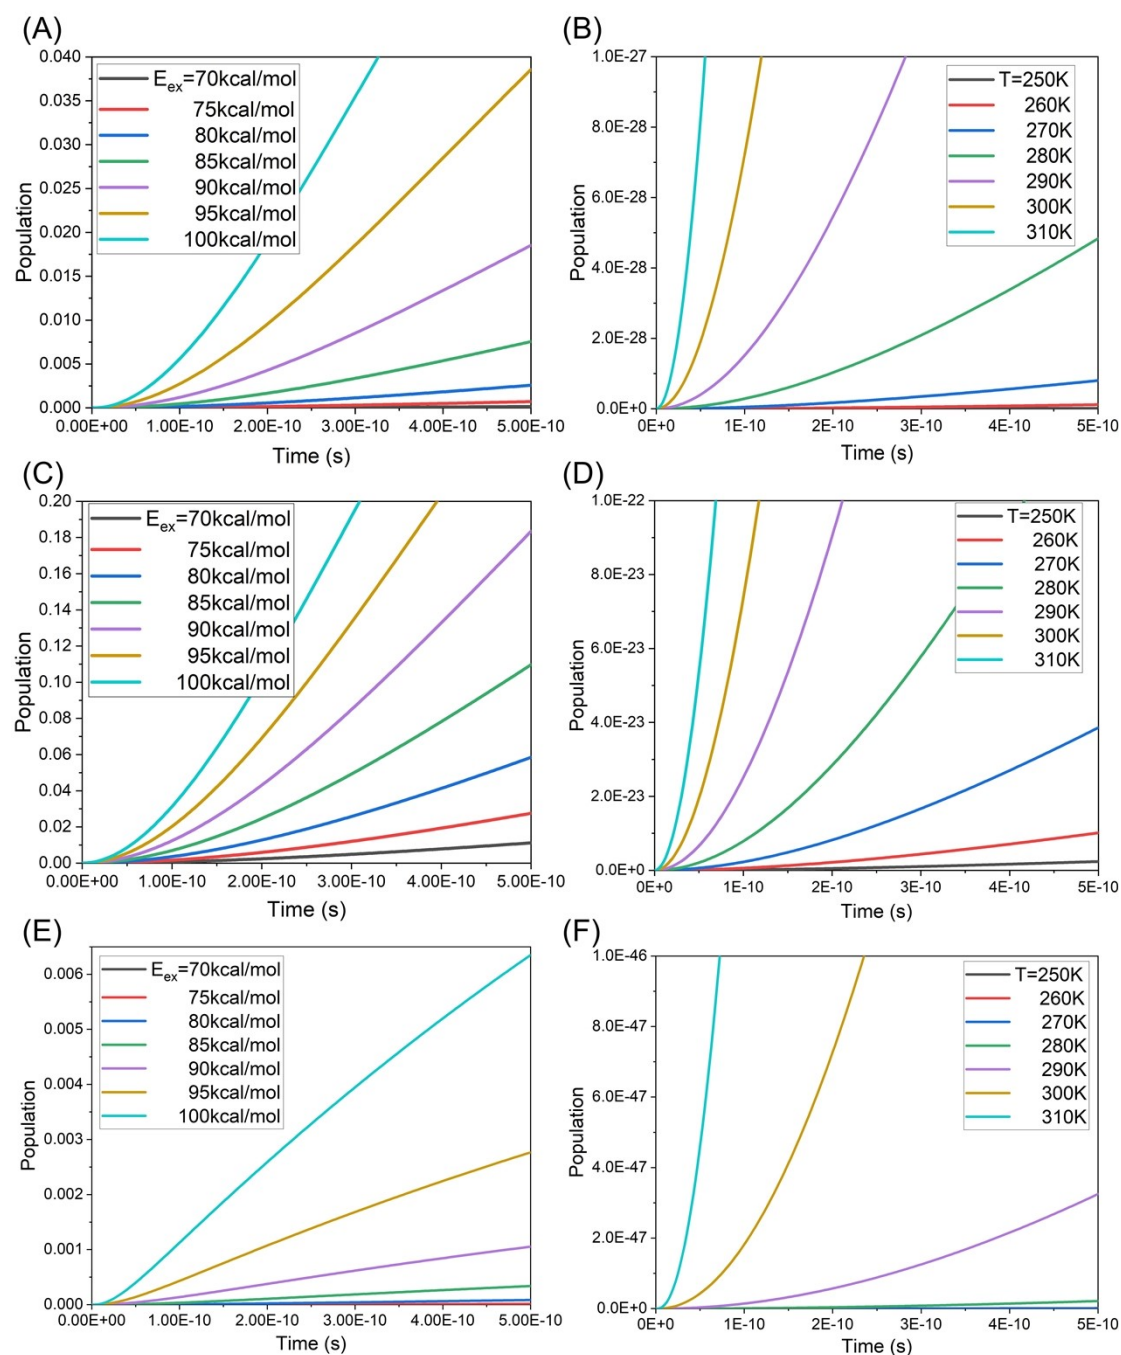

**Figure S19.** Micro-kinetics for photolysis of 4-NP in aqueous phase based on the microcanonical rate constants for (A) NO<sub>2</sub>, (B) NO and (C) HONO formation as the function of excitation energy of 70 ~ 100 kcal/mol; temperature-dependent micro-kinetics for photolysis pathways of (D) NO<sub>2</sub>, (E) NO and (F) HONO formation based on the canonical rate constant.

### S3. Supplementary Tables

**Table S1.** Functional test for linear response time-dependent density functional theory (LR-TDDFT) calculation to predict the wavelength of light absorption for  $S_0 \rightarrow S_1$  transition of 2-nitrophenol (2-NP) and 4-nitrophenol (4-NP) at the Franck-Condon point. The molecular geometry is optimized by the B3LYP/6-311++G(d,p) level of theory.

| Functional      | Wavelength (nm) |        |
|-----------------|-----------------|--------|
|                 | 2-NP            | 4-NP   |
| Exp.            | ~ 350           | ~ 320  |
| M06-2X          | 302.75          | 320.08 |
| B3LYP           | 358.08          | 325.62 |
| PBE0            | 362.44          | 319.33 |
| $\omega$ B97X-D | 313.76          | 314.46 |
| cam-B3LYP       | 315.28          | 314.59 |

**Table S2.** Computed excitation properties (TD-B3LYP/6-311++G(d,p)) for the first four singlet and triplet states for 2-NP and 4-NP.

|                | 2-NP     |                |        |                       | 4-NP     |                |        |                       |
|----------------|----------|----------------|--------|-----------------------|----------|----------------|--------|-----------------------|
|                | VEE / eV | $\lambda$ / nm | f      | Electronic Transition | VEE / eV | $\lambda$ / nm | f      | Electronic Transition |
| T <sub>1</sub> | 2.74     | 452.82         | N/A    | ( $\pi, \pi^*$ )      | 2.94     | 422.17         | N/A    | ( $\pi, \pi^*$ )      |
| T <sub>2</sub> | 3.07     | 404.27         | N/A    | ( $\pi, \pi^*$ )      | 3.10     | 399.49         | N/A    | ( $\pi, \pi^*$ )      |
| T <sub>3</sub> | 3.36     | 368.40         | N/A    | ( $\pi, \pi^*$ )      | 3.27     | 378.76         | N/A    | (n, $\pi^*$ )         |
| T <sub>4</sub> | 3.40     | 364.04         | N/A    | (n, $\pi^*$ )         | 3.85     | 321.76         | N/A    | (n, $\pi^*$ )         |
| S <sub>1</sub> | 3.46     | 358.08         | 0.0583 | ( $\pi, \pi^*$ )      | 3.81     | 325.62         | 0.0000 | (n, $\pi^*$ )         |
| S <sub>2</sub> | 3.94     | 316.30         | 0.0000 | (n, $\pi^*$ )         | 4.24     | 292.04         | 0.2622 | ( $\pi, \pi^*$ )      |

**Table S3.** Binding free energies (B3LYP/6-311++G(d,p) level) and vertical excitation energies ((TD)-B3LYP/6-311++G(d,p) level) to the  $S_1$  and  $T_1$  States of water-NP hydrated complex at the FC Points.

|                  | <b>Binding<br/>Energy</b> | <b>Binding<br/>Free<br/>Energy</b> | <b>VEE(<math>T_1</math>)</b> | <b>VEE(<math>S_1</math>)</b> |
|------------------|---------------------------|------------------------------------|------------------------------|------------------------------|
| <b>2-NP</b>      | N/A                       | N/A                                | 2.74                         | 3.46                         |
| <b>2-NP·1W_1</b> | -2.59                     | 4.77                               | 2.73                         | 3.45                         |
| <b>2-NP·1W_2</b> | -2.68                     | 3.55                               | 2.60                         | 3.33                         |
| <b>2-NP·2W</b>   | -8.12                     | 9.01                               | 2.65                         | 3.20                         |
| <b>4-NP</b>      | N/A                       | N/A                                | 2.94                         | 3.81                         |
| <b>4-NP·1W_1</b> | -3.23                     | 3.15                               | 2.98                         | 3.85                         |
| <b>4-NP·1W_2</b> | -3.55                     | 3.84                               | 2.96                         | 3.83                         |
| <b>4-NP·2W</b>   | -8.37                     | 7.08                               | 2.92                         | 3.85                         |

\* The unit for all the data in this table is kcal/mol.

\* All the geometries in this Table are listed in the Figure S2.

\* The binding energies are included with zero-point energy correction.

**Table S4.** Computed spin-orbit coupling (SOC) integral values (TD-B3LYP/6-311++G(d,p)) for 2-NP and 4-NP at Franck-Condon points.

| Structure | SOC ( $\text{cm}^{-1}$ ) |                       |       |       |       |                       |       |       |       |
|-----------|--------------------------|-----------------------|-------|-------|-------|-----------------------|-------|-------|-------|
|           | $S_0 \rightarrow$        | $S_1 \rightarrow T_n$ |       |       |       | $S_2 \rightarrow T_n$ |       |       |       |
|           | $T_1$                    | $T_1$                 | $T_2$ | $T_3$ | $T_4$ | $T_1$                 | $T_2$ | $T_3$ | $T_4$ |
| 2-NP      | 0.51                     | 0.19                  | 0.08  | 0.52  | 10.59 | 14.96                 | 54.58 | 18.32 | 2.15  |
| 4-NP      | 0.06                     | 58.45                 | 13.37 | 0.11  | 39.07 | 0.22                  | 0.07  | 13.47 | 18.84 |

**Table S5.** Computed parameters for intersystem crossing (ISC) of NP isomers and their complexes.

| Geometry                       | Electronic Transition           | SOC/cm <sup>-1</sup> | $\Delta E$ /eV | ISC rate / s <sup>-1</sup> |
|--------------------------------|---------------------------------|----------------------|----------------|----------------------------|
|                                | S <sub>1</sub> → T <sub>4</sub> | 10.59                | 0.06           | 3.92E+10                   |
|                                | S <sub>1</sub> → T <sub>3</sub> | 0.52                 | 0.10           | 4.13E+07                   |
| 2-NP(S <sub>0</sub> )          | S <sub>1</sub> → T <sub>2</sub> | 0.08                 | 0.39           | 7.26E+04                   |
|                                | S <sub>1</sub> → T <sub>1</sub> | 0.19                 | 0.72           | 1.21E+05                   |
|                                | T <sub>1</sub> → S <sub>0</sub> | 0.51                 | 2.91           | 5.39E+04                   |
| 2-NP-HT1(T <sub>1</sub> )      | T <sub>1</sub> → S <sub>0</sub> | 0.71                 | 0.81           | 1.34E+06                   |
| 2-NP-HT2(T <sub>1</sub> )      | T <sub>1</sub> → S <sub>0</sub> | 1.83                 | 0.11           | 4.57E+08                   |
| 2-NP-HT3(T <sub>1</sub> )      | T <sub>1</sub> → S <sub>0</sub> | 8.01                 | -0.05          | 2.80E+10                   |
|                                | S <sub>1</sub> → T <sub>4</sub> | 7.90                 | 0.07           | 1.66E+10                   |
|                                | S <sub>1</sub> → T <sub>3</sub> | 5.93                 | 0.08           | 7.41E+09                   |
| 2-NP·1W(S <sub>0</sub> )       | S <sub>1</sub> → T <sub>2</sub> | 0.29                 | 0.37           | 1.07E+06                   |
|                                | S <sub>1</sub> → T <sub>1</sub> | 0.20                 | 0.72           | 1.39E+05                   |
|                                | T <sub>1</sub> → S <sub>0</sub> | 0.68                 | 2.91           | 9.50E+04                   |
| 2-NP-HT1·1W(T <sub>1</sub> )   | T <sub>1</sub> → S <sub>0</sub> | 3.71                 | 0.06           | 4.68E+09                   |
| 2-NP-HT2·1W(T <sub>1</sub> )   | T <sub>1</sub> → S <sub>0</sub> | 3.00                 | 0.09           | 1.81E+09                   |
| 2-NP-HT3·1W(T <sub>1</sub> )   | T <sub>1</sub> → S <sub>0</sub> | 7.02                 | 0.00           | 6.17E+10                   |
|                                | S <sub>1</sub> → T <sub>4</sub> | 39.07                | -0.04          | 8.90E+11                   |
|                                | S <sub>1</sub> → T <sub>3</sub> | 0.11                 | 0.54           | 7.19E+04                   |
| 4-NP<br>(S <sub>0</sub> , gas) | S <sub>1</sub> → T <sub>2</sub> | 13.37                | 0.61           | 8.33E+08                   |
|                                | S <sub>1</sub> → T <sub>1</sub> | 58.45                | 0.87           | 7.84E+09                   |
|                                | T <sub>1</sub> → S <sub>0</sub> | 0.07                 | 2.94           | 8.60E+02                   |
| 4-NP<br>(T <sub>1</sub> , gas) | T <sub>1</sub> → S <sub>0</sub> | 21.90                | 1.32           | 4.76E+08                   |

|                                      |                       |       |       |          |
|--------------------------------------|-----------------------|-------|-------|----------|
|                                      | $S_1 \rightarrow T_4$ | 21.62 | -0.07 | 1.17E+11 |
|                                      | $S_1 \rightarrow T_3$ | 2.31  | 0.53  | 3.34E+07 |
| 4-NP·1W<br>(S <sub>0</sub> , gas)    | $S_1 \rightarrow T_2$ | 46.82 | 0.81  | 5.85E+09 |
|                                      | $S_1 \rightarrow T_1$ | 41.18 | 0.97  | 3.16E+09 |
|                                      | $T_1 \rightarrow S_0$ | 2.50  | 2.96  | 1.24E+06 |
| 4-NP·1W<br>(T <sub>1</sub> , gas)    | $T_1 \rightarrow S_0$ | 30.94 | 1.36  | 8.94E+08 |
|                                      | $S_1 \rightarrow T_4$ | 0.28  | 0.17  | 4.51E+06 |
|                                      | $S_1 \rightarrow T_3$ | 16.59 | 0.37  | 3.46E+09 |
| 4-NP<br>(S <sub>0</sub> , aq)        | $S_1 \rightarrow T_2$ | 0.28  | 0.58  | 4.04E+05 |
|                                      | $S_1 \rightarrow T_1$ | 0.02  | 1.08  | 5.96E+02 |
|                                      | $T_1 \rightarrow S_0$ | 0.01  | 2.62  | 4.32E+01 |
| 4-NP<br>(T <sub>1</sub> , aq)        | $T_1 \rightarrow S_0$ | 1.65  | 2.09  | 1.08E+06 |
|                                      | $S_1 \rightarrow T_4$ | 0.23  | 0.17  | 2.99E+06 |
|                                      | $S_1 \rightarrow T_3$ | 17.01 | 0.29  | 5.99E+09 |
| 4-NP·1W<br>(S <sub>0</sub> , aq)     | $S_1 \rightarrow T_2$ | 0.31  | 0.52  | 6.20E+05 |
|                                      | $S_1 \rightarrow T_1$ | 0.03  | 1.10  | 1.22E+03 |
|                                      | $T_1 \rightarrow S_0$ | 0.01  | 2.56  | 2.01E+01 |
| 4-NP·1W<br>(T <sub>1</sub> , aq)     | $T_1 \rightarrow S_0$ | 0.02  | 2.05  | 2.06E+02 |
|                                      | $S_1 \rightarrow T_4$ | 16.61 | -0.09 | 4.93E+10 |
|                                      | $S_1 \rightarrow T_3$ | 14.99 | 0.02  | 2.34E+11 |
| 4-NP·3W<br>(S <sub>0</sub> , aq)     | $S_1 \rightarrow T_2$ | 22.54 | 0.22  | 1.81E+10 |
|                                      | $S_1 \rightarrow T_1$ | 3.06  | 0.96  | 1.76E+07 |
|                                      | $T_1 \rightarrow S_0$ | 10.59 | 2.52  | 3.07E+07 |
| 4-NP·3W<br>(T <sub>1</sub> , aq)     | $T_1 \rightarrow S_0$ | 21.23 | 1.03  | 7.45E+08 |
| Aci-4-NP·3W<br>(T <sub>1</sub> , aq) | $T_1 \rightarrow S_0$ | 8.52  | 0.51  | 4.74E+08 |



**Table S6.** Computed RRKM unimolecular microcanonical rate constant  $k(E)$  (in  $s^{-1}$ ) as the function of excitation energy of 70 ~ 100  $\text{kcal}\cdot\text{mol}^{-1}$  (corresponding to wavelength of 280 ~ 410 nm) for each elementary reaction of photolysis channels of NPs and their hydrated complexes.

|           | Excitation Energy (kcal/mol) |          |          |          |          |          |          |
|-----------|------------------------------|----------|----------|----------|----------|----------|----------|
|           | 70                           | 75       | 80       | 85       | 90       | 95       | 100      |
| $k_1$     | 1.82E+12                     | 2.14E+12 | 2.46E+12 | 2.79E+12 | 3.12E+12 | 3.44E+12 | 3.76E+12 |
| $k_{-1}$  | 1.41E+13                     | 1.38E+13 | 1.36E+13 | 1.35E+13 | 1.33E+13 | 1.32E+13 | 1.31E+13 |
| $k_2$     | 3.10E+04                     | 1.87E+05 | 8.45E+05 | 3.04E+06 | 9.18E+06 | 2.40E+07 | 5.59E+07 |
| $k_{-2}$  | 1.65E+04                     | 9.53E+04 | 4.14E+05 | 1.45E+06 | 4.26E+06 | 1.09E+07 | 2.49E+07 |
| $k_{3a}$  | 1.07E+05                     | 6.47E+05 | 2.91E+06 | 1.05E+07 | 3.15E+07 | 8.22E+07 | 1.91E+08 |
| $k_{3b}$  | 5.33E+08                     | 1.61E+09 | 4.12E+09 | 9.29E+09 | 1.88E+10 | 3.51E+10 | 6.09E+10 |
| $k_{4a}$  | 1.36E+05                     | 1.18E+06 | 7.11E+06 | 3.24E+07 | 1.19E+08 | 3.67E+08 | 9.85E+08 |
| $k_{5a}$  | 1.20E+05                     | 9.47E+05 | 5.29E+06 | 2.27E+07 | 7.90E+07 | 2.34E+08 | 6.04E+08 |
| $k_{5b}$  | 3.45E+10                     | 6.59E+10 | 1.15E+11 | 1.88E+11 | 2.87E+11 | 4.20E+11 | 5.88E+11 |
| $k_{1w}$  | 4.83E+12                     | 5.48E+12 | 6.12E+12 | 6.74E+12 | 7.34E+12 | 7.93E+12 | 8.49E+12 |
| $k_{-1w}$ | 5.35E+12                     | 5.42E+12 | 5.48E+12 | 5.53E+12 | 5.58E+12 | 5.62E+12 | 5.66E+12 |
| $k_{2w}$  | 1.30E+08                     | 2.37E+08 | 3.99E+08 | 6.29E+08 | 9.39E+08 | 1.34E+09 | 1.84E+09 |
| $k_{-2w}$ | 1.64E+08                     | 2.93E+08 | 4.85E+08 | 7.53E+08 | 1.11E+09 | 1.56E+09 | 2.13E+09 |
| $k_{3aw}$ | 3.22E+03                     | 2.35E+04 | 1.25E+05 | 5.24E+05 | 1.80E+06 | 5.29E+06 | 1.37E+07 |
| $k_{3bw}$ | 2.50E+07                     | 8.98E+07 | 2.67E+08 | 6.86E+08 | 1.56E+09 | 3.21E+09 | 6.11E+09 |

|                  |          |          |          |          |          |          |          |
|------------------|----------|----------|----------|----------|----------|----------|----------|
| k <sub>4aw</sub> | 1.36E+02 | 2.58E+03 | 2.93E+04 | 2.27E+05 | 1.30E+06 | 5.88E+06 | 2.20E+07 |
| k <sub>5aw</sub> | 3.44E+02 | 5.67E+03 | 5.78E+04 | 4.10E+05 | 2.18E+06 | 9.31E+06 | 3.30E+07 |
| k <sub>5bw</sub> | 4.55E+08 | 1.40E+09 | 3.65E+09 | 8.39E+09 | 1.74E+10 | 3.30E+10 | 5.83E+10 |
| k <sub>6</sub>   | 1.81E+06 | 7.85E+06 | 2.72E+07 | 7.86E+07 | 1.97E+08 | 4.41E+08 | 8.97E+08 |
| k <sub>7</sub>   | 1.47E+08 | 3.54E+08 | 7.55E+08 | 1.45E+09 | 2.58E+09 | 4.27E+09 | 6.69E+09 |
| k <sub>6w</sub>  | 2.35E+04 | 1.35E+05 | 5.94E+05 | 2.11E+06 | 6.32E+06 | 1.65E+07 | 3.86E+07 |
| k <sub>7w</sub>  | 1.14E+07 | 3.09E+07 | 7.25E+07 | 1.52E+08 | 2.91E+08 | 5.15E+08 | 8.58E+08 |
| k <sub>15</sub>  | 5.87E+05 | 2.79E+06 | 1.03E+07 | 3.17E+07 | 8.37E+07 | 1.95E+08 | 4.12E+08 |
| k <sub>16</sub>  | 4.30E+07 | 1.07E+08 | 2.33E+08 | 4.57E+08 | 8.23E+08 | 1.38E+09 | 2.20E+09 |
| k <sub>17</sub>  | 1.55E+03 | 2.89E+03 | 4.88E+03 | 7.63E+03 | 1.12E+04 | 1.58E+04 | 2.13E+04 |
| k <sub>18</sub>  | 3.44E+06 | 6.91E+06 | 1.27E+07 | 2.15E+07 | 3.43E+07 | 5.19E+07 | 7.52E+07 |
| k <sub>19</sub>  | 4.31E+05 | 2.36E+06 | 9.97E+06 | 3.43E+07 | 1.00E+08 | 2.56E+08 | 5.85E+08 |
| k <sub>20</sub>  | 1.58E+09 | 3.28E+09 | 6.15E+09 | 1.06E+10 | 1.72E+10 | 2.64E+10 | 3.87E+10 |

---

**Table S7.** Computed RRKM unimolecular canonical rate constant  $k(T)$  (in  $s^{-1}$ ) as the function of temperature of 250 ~ 310 K for each elementary reaction of photolysis channels of NPs and their hydrated complexes.

|           | Temperature (K) |          |          |          |          |          |          |
|-----------|-----------------|----------|----------|----------|----------|----------|----------|
|           | 250             | 260      | 270      | 280      | 290      | 300      | 310      |
| $k_1$     | 3.88E+09        | 5.39E+09 | 7.30E+09 | 9.67E+09 | 1.26E+10 | 1.61E+10 | 2.02E+10 |
| $k_{-1}$  | 2.80E+13        | 2.70E+13 | 2.61E+13 | 2.53E+13 | 2.46E+13 | 2.39E+13 | 2.33E+13 |
| $k_2$     | 5.53E-13        | 5.42E-12 | 4.48E-11 | 3.19E-10 | 1.98E-09 | 1.09E-08 | 5.37E-08 |
| $k_{-2}$  | 4.86E-13        | 4.60E-12 | 3.68E-11 | 2.54E-10 | 1.53E-09 | 8.21E-09 | 3.94E-08 |
| $k_{3a}$  | 2.00E-12        | 1.96E-11 | 1.61E-10 | 1.15E-09 | 7.10E-09 | 3.90E-08 | 1.92E-07 |
| $k_{3b}$  | 9.89E-05        | 5.22E-04 | 2.43E-03 | 1.02E-02 | 3.85E-02 | 1.33E-01 | 4.27E-01 |
| $k_{4a}$  | 8.22E-14        | 1.04E-12 | 1.08E-11 | 9.58E-11 | 7.29E-10 | 4.85E-09 | 2.85E-08 |
| $k_{5a}$  | 1.66E-13        | 1.96E-12 | 1.94E-11 | 1.62E-10 | 1.17E-09 | 7.43E-09 | 4.18E-08 |
| $k_{5b}$  | 5.83E+01        | 1.77E+02 | 4.97E+02 | 1.29E+03 | 3.15E+03 | 7.24E+03 | 1.57E+04 |
| $k_{1w}$  | 4.41E+00        | 5.44E+00 | 6.61E+00 | 7.91E+00 | 9.36E+00 | 1.09E+01 | 1.27E+01 |
| $k_{-1w}$ | 1.24E+02        | 1.27E+02 | 1.29E+02 | 1.31E+02 | 1.34E+02 | 1.36E+02 | 1.38E+02 |
| $k_{2w}$  | 2.09E-09        | 5.04E-09 | 1.14E-08 | 2.42E-08 | 4.90E-08 | 9.44E-08 | 1.75E-07 |
| $k_{-2w}$ | 3.97E-09        | 9.33E-09 | 2.06E-08 | 4.28E-08 | 8.48E-08 | 1.60E-07 | 2.91E-07 |
| $k_{3aw}$ | 1.44E-21        | 1.21E-20 | 8.74E-20 | 5.47E-19 | 3.01E-18 | 1.48E-17 | 6.58E-17 |
| $k_{3bw}$ | 1.20E-14        | 5.85E-14 | 2.54E-13 | 9.94E-13 | 3.54E-12 | 1.16E-11 | 3.50E-11 |

|           |          |          |          |          |          |          |          |
|-----------|----------|----------|----------|----------|----------|----------|----------|
| $k_{4aw}$ | 2.34E-25 | 3.37E-24 | 3.98E-23 | 3.94E-22 | 3.34E-21 | 2.45E-20 | 1.58E-19 |
| $k_{5aw}$ | 1.10E-24 | 1.48E-23 | 1.64E-22 | 1.53E-21 | 1.23E-20 | 8.56E-20 | 5.26E-19 |
| $k_{5bw}$ | 1.62E-12 | 6.87E-12 | 2.61E-11 | 9.03E-11 | 2.86E-10 | 8.41E-10 | 2.30E-09 |
| $k_6$     | 5.03E-20 | 3.77E-19 | 2.43E-18 | 1.38E-17 | 6.90E-17 | 3.11E-16 | 1.27E-15 |
| $k_7$     | 5.23E-14 | 2.15E-13 | 7.95E-13 | 2.68E-12 | 8.31E-12 | 2.39E-11 | 6.41E-11 |
| $k_{6w}$  | 7.93E-20 | 5.66E-19 | 3.49E-18 | 1.89E-17 | 9.11E-17 | 3.95E-16 | 1.56E-15 |
| $k_{7w}$  | 2.50E-13 | 9.31E-13 | 3.15E-12 | 9.77E-12 | 2.80E-11 | 7.49E-11 | 1.88E-10 |
| $k_{15}$  | 5.45E-21 | 4.40E-20 | 3.05E-19 | 1.84E-18 | 9.78E-18 | 4.66E-17 | 2.01E-16 |
| $k_{16}$  | 9.10E-15 | 3.86E-14 | 1.47E-13 | 5.09E-13 | 1.62E-12 | 4.76E-12 | 1.31E-11 |
| $k_{17}$  | 8.93E-17 | 3.63E-16 | 1.33E-15 | 4.44E-15 | 1.36E-14 | 3.89E-14 | 1.04E-13 |
| $k_{18}$  | 5.80E-09 | 1.24E-08 | 2.49E-08 | 4.77E-08 | 8.73E-08 | 1.54E-07 | 2.60E-07 |
| $k_{19}$  | 1.91E-26 | 2.69E-25 | 3.11E-24 | 3.03E-23 | 2.51E-22 | 1.81E-21 | 1.15E-20 |
| $k_{20}$  | 2.46E-09 | 6.88E-09 | 1.79E-08 | 4.33E-08 | 9.89E-08 | 2.14E-07 | 4.39E-07 |

**Table S8.** Bimolecular rate constants (in  $\text{molecules}\cdot\text{cm}^{-1}\cdot\text{s}^{-1}$ ) for elementary steps used for the kinetics analysis at 250 K and 300 K involved in eq. (S20) ~ (S32).

|          | 250 K    | 300 K    |
|----------|----------|----------|
| $k_8$    | 8.41E-11 | 3.48E-10 |
| $k_9$    | 3.71E-05 | 1.81E-05 |
| $k_{10}$ | 5.47E-02 | 1.91E+08 |
| $k_{11}$ | 3.17E+02 | 1.07E+01 |
| $k_{12}$ | 6.76E-09 | 2.05E+02 |
| $k_{13}$ | 1.36E+04 | 2.48E+02 |

---

 $k_{14}$  1.27E-02 4.10E+07

---

**Table S9.** Calculated concentrations (in molecules·cm<sup>-3</sup>) of H<sub>2</sub>O under the different values of Relative Humidity (RH, %) at 250 K and 300 K.

| RH / % | Concentration of H <sub>2</sub> O / molecules·cm <sup>-3</sup> |          |
|--------|----------------------------------------------------------------|----------|
|        | 250 K                                                          | 300 K    |
| 0      | 0                                                              | 0        |
| 10     | 2.24E+15                                                       | 8.61E+16 |
| 20     | 4.47E+15                                                       | 1.72E+17 |
| 30     | 6.71E+15                                                       | 2.58E+17 |
| 40     | 8.94E+15                                                       | 3.45E+17 |
| 50     | 1.12E+16                                                       | 4.31E+17 |
| 60     | 1.34E+16                                                       | 5.17E+17 |
| 70     | 1.56E+16                                                       | 6.03E+17 |
| 80     | 1.79E+16                                                       | 6.89E+17 |
| 90     | 2.01E+16                                                       | 7.75E+17 |
| 100    | 2.24E+16                                                       | 8.61E+17 |

---

**Table S10.** Calculated initial relative population of water-NP complex in the atmosphere under the different values of Relative Humidity (RH, %) at 250 K and 300 K.

| RH / % | Initial Relative Population |          |                  |          |              |           |              |           |
|--------|-----------------------------|----------|------------------|----------|--------------|-----------|--------------|-----------|
|        | water-2-NP                  |          | water-4-NP (gas) |          | 4-NP·1W (aq) |           | 4-NP·3W (aq) |           |
|        | 250 K                       | 300 K    | 250 K            | 300 K    | 250 K        | 300 K     | 250 K        | 300 K     |
| 0      | 0.00E+00                    | 0.00E+00 | 0.00E+00         | 0.00E+00 | 0.00E+00     | 0.00E+00  | 0.00E+00     | 0.00E+00  |
| 10     | 3.73E-06                    | 1.43E-04 | 3.72E-06         | 1.43E-04 | 1.86E-09     | 2.08E-06  | 1.99E-09     | 1.47E-02  |
| 20     | 7.44E-06                    | 2.86E-04 | 7.43E-06         | 2.86E-04 | 3.71E-09     | 4.16E-06  | 1.58E-08     | 1.17E-01  |
| 30     | 1.12E-05                    | 4.30E-04 | 1.12E-05         | 4.29E-04 | 5.56E-09     | 6.24E-06  | 5.34E-08     | 3.96E-01  |
| 40     | 1.49E-05                    | 5.74E-04 | 1.49E-05         | 5.74E-04 | 7.41E-09     | 8.35E-06  | 1.26E-07     | 9.48E-01  |
| 50     | 1.86E-05                    | 7.18E-04 | 1.86E-05         | 7.17E-04 | 9.29E-09     | 1.04E-05  | 2.48E-07     | 1.85E+00  |
| 60     | 2.23E-05                    | 8.61E-04 | 2.23E-05         | 8.60E-04 | 1.11E-08     | 1.25E-05  | 4.25E-07     | 3.19E+00  |
| 70     | 2.60E-05                    | 1.00E-03 | 2.59E-05         | 1.00E-03 | 1.29E-08     | 1.46E-05  | 6.71E-07     | 5.06E+00  |
| 80     | 2.98E-05                    | 1.15E-03 | 2.98E-05         | 1.15E-03 | 1.48E-08     | 1.67E-05  | 1.01E-06     | 7.55E+00  |
| 90     | 3.34E-05                    | 1.29E-03 | 3.34E-05         | 1.29E-03 | 1.67E-08     | 1.87E-05  | 1.43E-06     | 1.07E+01  |
| 100    | 3.73E-05                    | 1.43E-03 | 3.72E-05         | 1.43E-03 | 1.86E-08     | 2.08E-05* | 1.99E-06     | 1.47E+01* |

\* The data are selected as the initial concentration of 4-NP hydrated complexes in micro-kinetics studies.

**Table S11.** Final relative populations, total first-order microcanonical rate constant (in  $s^{-1}$ ) and quantum yields of HONO and OH $\cdot$  formation as the function of excitation energy of 70 ~ 100 kcal $\cdot$ mol $^{-1}$  (corresponding to wavelength of 280 ~ 410 nm) from unimolecular and water-assisted reaction of 2-NP.

|                                                                  | Excitation Energy (kcal $\cdot$ mol $^{-1}$ ) |          |          |          |          |          |          |
|------------------------------------------------------------------|-----------------------------------------------|----------|----------|----------|----------|----------|----------|
|                                                                  | 70                                            | 75       | 80       | 85       | 90       | 95       | 100      |
| <i>Final Relative Populations</i>                                |                                               |          |          |          |          |          |          |
| HONO <sup>a</sup>                                                | 2.10E-04                                      | 4.90E-04 | 1.00E-03 | 1.80E-04 | 3.10E-04 | 5.00E-04 | 7.70E-04 |
| HONO <sup>b</sup>                                                | 7.10E-10                                      | 5.50E-09 | 3.00E-08 | 1.40E-07 | 5.10E-07 | 1.60E-06 | 4.20E-06 |
| OH $\cdot$ <sup>a</sup>                                          | 0.89                                          | 0.96     | 0.98     | 0.99     | 0.99     | 0.99     | 0.99     |
| OH $\cdot$ <sup>b</sup>                                          | 5.50E-06                                      | 2.00E-05 | 5.60E-05 | 1.30E-04 | 2.60E-04 | 4.50E-04 | 6.50E-04 |
| <i>Total microcanonical rate constants (<math>s^{-1}</math>)</i> |                                               |          |          |          |          |          |          |
| HONO <sup>a</sup>                                                | 2.10E+04                                      | 4.91E+04 | 1.78E+05 | 8.01E+04 | 2.59E+05 | 6.61E+05 | 1.49E+06 |
| HONO <sup>b</sup>                                                | 4.97E+02                                      | 7.26E+02 | 3.09E+03 | 2.18E+04 | 8.29E+04 | 3.11E+05 | 1.01E+06 |
| OH $\cdot$ <sup>a</sup>                                          | 8.90E+07                                      | 9.62E+07 | 1.75E+08 | 4.11E+08 | 7.96E+08 | 1.30E+09 | 1.92E+09 |
| OH $\cdot$ <sup>b</sup>                                          | 3.85E+06                                      | 2.45E+06 | 7.25E+06 | 2.02E+07 | 4.23E+07 | 8.51E+07 | 1.30E+08 |
| <i>Quantum Yields</i>                                            |                                               |          |          |          |          |          |          |
| HONO <sup>a</sup>                                                | 2.36E-04                                      | 5.10E-04 | 1.02E-03 | 1.95E-04 | 3.26E-04 | 5.06E-04 | 7.77E-04 |
| HONO <sup>b</sup>                                                | 1.29E-04                                      | 2.96E-04 | 4.25E-04 | 1.08E-03 | 1.96E-03 | 3.64E-03 | 7.74E-03 |
| OH $\cdot$ <sup>a</sup>                                          | 1.00E+00                                      | 9.99E-01 | 9.99E-01 | 1.00E+00 | 1.00E+00 | 9.99E-01 | 9.99E-01 |
| OH $\cdot$ <sup>b</sup>                                          | 1.00E+00                                      | 1.00E+00 | 1.00E+00 | 9.99E-01 | 9.98E-01 | 9.96E-01 | 9.92E-01 |

<sup>a</sup> HONO and OH $\cdot$  formation from unimolecular reactions;

<sup>b</sup> HONO and OH $\cdot$  formation from water-assisted reactions with the relative humidity of 100%.

**Table S12.** Final relative population, total first-order microcanonical rate constants (in  $s^{-1}$ ) and quantum yields of  $\text{NO}_2$  and  $\text{NO}$  formation as the function of excitation energy of 70 ~ 100  $\text{kcal}\cdot\text{mol}^{-1}$  (corresponding to wavelength of 280 ~ 410 nm) from unimolecular and water-assisted reaction of 4-NP.

|                                                                  | Excitation Energy ( $\text{kcal}\cdot\text{mol}^{-1}$ ) |          |          |          |          |          |          |
|------------------------------------------------------------------|---------------------------------------------------------|----------|----------|----------|----------|----------|----------|
|                                                                  | 70                                                      | 75       | 80       | 85       | 90       | 95       | 100      |
| <i>Final relative populations</i>                                |                                                         |          |          |          |          |          |          |
| $\text{NO}_2^{\text{a}}$                                         | 2.89E-03                                                | 9.37E-03 | 2.16E-02 | 3.92E-02 | 6.06E-02 | 8.50E-02 | 1.11E-01 |
| $\text{NO}_2^{\text{b}}$                                         | 3.71E-08                                                | 2.09E-07 | 8.78E-07 | 2.88E-06 | 7.59E-06 | 1.66E-05 | 3.08E-05 |
| $\text{NO}^{\text{a}}$                                           | 2.35E-01                                                | 4.22E-01 | 6.00E-01 | 7.23E-01 | 7.93E-01 | 8.23E-01 | 8.30E-01 |
| $\text{NO}^{\text{b}}$                                           | 1.80E-05                                                | 4.78E-05 | 1.07E-04 | 2.07E-04 | 3.49E-04 | 5.17E-04 | 6.85E-04 |
| <i>Total microcanonical rate constants (<math>s^{-1}</math>)</i> |                                                         |          |          |          |          |          |          |
| $\text{NO}_2^{\text{a}}$                                         | 2.89E+05                                                | 9.37E+05 | 2.16E+06 | 4.41E+06 | 9.24E+06 | 2.20E+07 | 4.81E+07 |
| $\text{NO}_2^{\text{b}}$                                         | 2.60E+03                                                | 1.46E+04 | 6.14E+04 | 2.01E+05 | 5.30E+05 | 1.16E+06 | 2.22E+06 |
| $\text{NO}^{\text{a}}$                                           | 2.35E+07                                                | 4.22E+07 | 6.00E+07 | 8.13E+07 | 1.21E+08 | 2.13E+08 | 3.59E+08 |
| $\text{NO}^{\text{b}}$                                           | 1.26E+06                                                | 3.34E+06 | 7.50E+06 | 1.45E+07 | 2.44E+07 | 3.63E+07 | 4.94E+07 |
| <i>Quantum yields</i>                                            |                                                         |          |          |          |          |          |          |
| $\text{NO}_2^{\text{a}}$                                         | 1.22E-02                                                | 2.17E-02 | 3.48E-02 | 5.14E-02 | 7.09E-02 | 9.36E-02 | 1.18E-01 |
| $\text{NO}_2^{\text{b}}$                                         | 2.06E-03                                                | 4.35E-03 | 8.13E-03 | 1.37E-02 | 2.13E-02 | 3.10E-02 | 4.31E-02 |
| $\text{NO}^{\text{a}}$                                           | 9.88E-01                                                | 9.78E-01 | 9.65E-01 | 9.49E-01 | 9.29E-01 | 9.06E-01 | 8.82E-01 |
| $\text{NO}^{\text{b}}$                                           | 9.98E-01                                                | 9.96E-01 | 9.92E-01 | 9.86E-01 | 9.79E-01 | 9.69E-01 | 9.57E-01 |

<sup>a</sup>  $\text{NO}_2$  and  $\text{NO}$  formation from unimolecular reactions;

<sup>b</sup>  $\text{NO}_2$  and  $\text{NO}$  formation from water-assisted reactions with the relative humidity of 100%.

**Table S13.** Final population of HONO formation as the function of relative humidity of 10% ~ 100% at 250 K and 300 K with initial population of B1 intermediate and  $\text{NO}_2$  of  $2.16\times 10^{-2}$  (generate under the 80  $\text{kcal/mol}$  irradiation). The simulation timescale is  $2\times 10^{-4}$  s.

| Temperatur | Relative Humidity |          |          |          |          |          |          |
|------------|-------------------|----------|----------|----------|----------|----------|----------|
|            | e                 | 10%      | 30%      | 50%      | 70%      | 90%      | 100%     |
| 250K       |                   | 0.17E-16 | 0.18E-16 | 0.18E-16 | 0.18E-16 | 0.18E-16 | 0.18E-16 |



**Table S14.** Final relative population, total microcanonical rate constants (in  $s^{-1}$ ) and quantum yields of  $\text{NO}_2$ ,  $\text{NO}$  and  $\text{HONO}$  formation as the function of excitation energy of 70 ~ 100  $\text{kcal}\cdot\text{mol}^{-1}$  (corresponding to wavelength of 280 ~ 410 nm) from the photolysis of 4-NP in aqueous phase. The simulation timescale is  $5\times 10^{-10}$  s.

|                                                                     | Excitation Energy ( $\text{kcal}\cdot\text{mol}^{-1}$ ) |          |          |          |          |          |          |
|---------------------------------------------------------------------|---------------------------------------------------------|----------|----------|----------|----------|----------|----------|
|                                                                     | 70                                                      | 75       | 80       | 85       | 90       | 95       | 100      |
| <i>Final relative populations</i>                                   |                                                         |          |          |          |          |          |          |
| $\text{NO}_2$                                                       | 1.53E-04                                                | 7.18E-04 | 2.59E-03 | 7.61E-03 | 1.87E-02 | 3.88E-02 | 6.96E-02 |
| $\text{NO}$                                                         | 1.12E-02                                                | 2.75E-02 | 5.85E-02 | 1.10E-01 | 1.83E-01 | 2.75E-01 | 3.72E-01 |
| $\text{HONO}^{\text{a}}$                                            | 9.90E-12                                                | 1.85E-11 | 3.12E-11 | 4.87E-11 | 7.15E-11 | 1.01E-10 | 1.36E-10 |
| $\text{HONO}^{\text{b}}$                                            | 1.70E-06                                                | 1.50E-05 | 8.50E-05 | 3.40E-04 | 1.00E-03 | 2.80E-03 | 6.40E-03 |
| $\text{HONO}^{\text{c}}$                                            | 1.70E-06                                                | 1.50E-05 | 8.50E-05 | 3.40E-04 | 1.00E-03 | 2.80E-03 | 6.40E-03 |
| <i>Total microcanonical rate constants (in <math>s^{-1}</math>)</i> |                                                         |          |          |          |          |          |          |
| $\text{NO}_2$                                                       | 3.06E+05                                                | 1.44E+06 | 5.17E+06 | 1.52E+07 | 3.73E+07 | 7.76E+07 | 1.39E+08 |
| $\text{NO}$                                                         | 2.24E+07                                                | 5.51E+07 | 1.17E+08 | 2.19E+08 | 3.67E+08 | 5.49E+08 | 7.43E+08 |
| $\text{HONO}$                                                       | 2.31E+02                                                | 2.04E+03 | 1.16E+04 | 4.63E+04 | 1.36E+05 | 3.81E+05 | 8.71E+05 |
| <i>Quantum yields</i>                                               |                                                         |          |          |          |          |          |          |
| $\text{NO}_2$                                                       | 1.35E-02                                                | 2.54E-02 | 4.23E-02 | 6.49E-02 | 9.23E-02 | 1.24E-01 | 1.58E-01 |
| $\text{NO}$                                                         | 9.87E-01                                                | 9.75E-01 | 9.58E-01 | 9.35E-01 | 9.07E-01 | 8.76E-01 | 8.41E-01 |
| $\text{HONO}$                                                       | 1.02E-05                                                | 3.61E-05 | 9.47E-05 | 1.97E-04 | 3.37E-04 | 6.07E-04 | 9.85E-04 |

<sup>a</sup>  $\text{HONO}$  formation from bimolecular reactions, where 4-NP reacts with water molecules;

<sup>b</sup>  $\text{HONO}$  formation from unimolecular dissociation of aci-4-NP, which is initiated from the intermolecular excited hydrogen transfer;

<sup>c</sup> total quantum yields for  $\text{HONO}$  formation.

**Table S15.** Total canonical rate constants (in s<sup>-1</sup>) as the function of temperature of 250 ~ 310 K from the photolysis of NP in gas and aqueous phase. The simulation timescale is 5×10<sup>-10</sup> s.

|                        | Temperature (K)        |                        |                        |                       |                       |                       |                       |
|------------------------|------------------------|------------------------|------------------------|-----------------------|-----------------------|-----------------------|-----------------------|
|                        | 250                    | 260                    | 270                    | 280                   | 290                   | 300                   | 310                   |
| <i>2-Nitrophenol</i>   |                        |                        |                        |                       |                       |                       |                       |
| HONO (gas)             | 1.98×10 <sup>-12</sup> | 1.94×10 <sup>-11</sup> | 1.60×10 <sup>-10</sup> | 1.14×10 <sup>-9</sup> | 6.37×10 <sup>-9</sup> | 3.86×10 <sup>-8</sup> | 1.90×10 <sup>-7</sup> |
| OH· (gas)              | 9.80×10 <sup>-5</sup>  | 5.17×10 <sup>-4</sup>  | 2.41×10 <sup>-3</sup>  | 1.01×10 <sup>-2</sup> | 3.44×10 <sup>-2</sup> | 1.32×10 <sup>-1</sup> | 4.23×10 <sup>-1</sup> |
| <i>4-Nitrophenol</i>   |                        |                        |                        |                       |                       |                       |                       |
| NO <sub>2</sub> (gas)  | 1.05E-20               | 7.85E-20               | 5.06E-19               | 2.87E-18              | 1.44E-17              | 6.47E-17              | 2.64E-16              |
| NO (gas)               | 1.04E-02               | 4.48E-14               | 1.66E-13               | 5.58E-13              | 1.73E-12              | 4.98E-12              | 1.33E-11              |
| NO <sub>2</sub> (aq)   | 2.86E-21               | 2.31E-20               | 7.72E-14               | 2.67E-13              | 8.51E-13              | 2.50E-12              | 6.88E-12              |
| NO (aq)                | 4.78E-15               | 2.03E-14               | 1.60E-19               | 9.66E-19              | 5.14E-18              | 2.45E-17              | 1.06E-16              |
| HONO (aq) <sup>a</sup> | 2.23E-44               | 6.73E-43               | 1.56E-41               | 2.92E-40              | 4.42E-39              | 5.62E-38              | 6.03E-37              |

<sup>a</sup> HONO formation from unimolecular dissociation of aci-4-NP, which is initiated from the intermolecular excited hydrogen transfer.

## S4. Cartesian Coordinates

All the atomic cartesian coordinates of intermediates and transition states in the manuscript are shown below (in Å):

### 4.1 Photolysis of 2-Nitrophenol in Gas-Phase

2-NP ( $S_0$ , gas)

|   |             |             |             |
|---|-------------|-------------|-------------|
| C | -1.90323800 | -1.41426400 | 0.00002000  |
| C | -0.52388600 | -1.45798000 | 0.00001700  |
| C | 0.21518100  | -0.26631700 | 0.00007600  |
| C | -0.42790600 | 0.99442000  | 0.00001300  |
| C | -1.83194600 | 1.01008900  | -0.00000500 |
| C | -2.55257600 | -0.16961400 | -0.00001200 |
| H | -2.47595400 | -2.33276900 | 0.00002100  |
| H | 0.01553900  | -2.39509100 | 0.00003700  |
| H | -2.32231300 | 1.97551600  | -0.00007700 |
| H | -3.63587100 | -0.12801700 | -0.00002700 |
| O | 0.20735900  | 2.17042000  | -0.00004300 |
| H | 1.17105000  | 1.98336800  | -0.00021400 |
| N | 1.66463300  | -0.36228600 | -0.00001500 |
| O | 2.32028300  | 0.69903100  | 0.00010900  |
| O | 2.19002500  | -1.46257600 | -0.00010200 |

TS1 ( $S_0$ , gas)

|   |             |             |             |
|---|-------------|-------------|-------------|
| C | 1.79606054  | -1.52652711 | 0.46631310  |
| C | 0.63909681  | -1.44204109 | -0.23523735 |
| C | -0.12821234 | -0.22817671 | -0.20981344 |
| C | 0.23739208  | 0.89471043  | 0.71342982  |
| C | 1.53812510  | 0.72699779  | 1.36746809  |
| C | 2.25596439  | -0.41559056 | 1.26281138  |
| H | 2.39561162  | -2.42711898 | 0.41577371  |
| H | 0.28838136  | -2.25359733 | -0.85861592 |
| H | 1.86302585  | 1.55818701  | 1.98138941  |
| H | 3.19827017  | -0.51157644 | 1.79192721  |
| O | -0.49850785 | 1.84016688  | 0.97355552  |
| H | -2.56880205 | 1.15397557  | -0.70809755 |
| N | -1.23057747 | -0.18596855 | -0.97729058 |
| O | -1.75449746 | 1.09148121  | -1.23212241 |

O -1.75115763 -1.11912227 -1.57560882

2-NP-HT1 (S<sub>0</sub>, gas)

C -1.86925000 -1.44426100 0.00002800  
C -0.51425900 -1.46756900 0.00001800  
C 0.22924500 -0.23762000 0.00000500  
C -0.46327300 1.08990000 -0.00000500  
C -1.92714800 0.99296600 -0.00004800  
C -2.58133000 -0.19149800 -0.00001500  
H -2.42621500 -2.37309200 0.00004400  
H 0.03866100 -2.39681800 0.00000200  
H -2.45135100 1.94093800 -0.00005500  
H -3.66619800 -0.20974400 0.00002800  
O 0.10846100 2.17298500 0.00002200  
H 3.21608500 0.45989200 -0.00020600  
N 1.56810800 -0.35587000 0.00000300  
O 2.30729400 0.81025300 0.00004400  
O 2.21778800 -1.40593600 -0.00003200

TS2 (S<sub>0</sub>, gas)

C 1.87616657 -1.50458151 -0.00017482  
C 0.52246897 -1.49412467 0.00022548  
C -0.17467360 -0.23510871 0.00012648  
C 0.55714733 1.07465801 -0.00012385  
C 2.01688061 0.93745266 -0.00068940  
C 2.62679874 -0.27015802 -0.00068898  
H 2.40995673 -2.44691192 -0.00010369  
H -0.05984782 -2.40572589 0.00063234  
H 2.57443925 1.86608927 -0.00103616  
H 3.71027306 -0.32630054 -0.00110154  
O -0.00622737 2.15833860 0.00007871  
H -3.05850995 -0.32906341 0.00045768  
N -1.49671213 -0.25201285 0.00029153  
O -2.34298567 0.73919439 0.00029858  
O -2.26218005 -1.32817719 0.00043415

2-NP-HT2 (S<sub>0</sub>, gas)

C -1.74724000 -1.53949500 0.00001300

|   |             |             |             |
|---|-------------|-------------|-------------|
| C | -0.39307400 | -1.45939400 | 0.00004300  |
| C | 0.24451900  | -0.17302900 | 0.00007900  |
| C | -0.55165400 | 1.09544600  | 0.00025500  |
| C | -2.00185100 | 0.88650400  | -0.00001900 |
| C | -2.55672900 | -0.34841600 | -0.00005800 |
| H | -2.22968600 | -2.50910100 | -0.00003900 |
| H | 0.21883200  | -2.34928300 | 0.00000700  |
| H | -2.60153800 | 1.78859900  | -0.00013100 |
| H | -3.63650200 | -0.45495800 | -0.00017300 |
| O | -0.05195300 | 2.21306700  | -0.00012900 |
| H | 3.18973800  | -1.04100200 | -0.00010400 |
| N | 1.58190100  | -0.07809900 | 0.00000200  |
| O | 2.29304300  | 0.90924400  | 0.00003200  |
| O | 2.26166300  | -1.32946800 | -0.00008400 |

TS3 (S<sub>0</sub>, gas)

|   |             |             |             |
|---|-------------|-------------|-------------|
| C | 2.49017491  | -1.56824508 | -0.01332329 |
| C | 1.10112446  | -1.59920030 | 0.07052348  |
| C | 0.53444544  | -0.36938872 | 0.26781337  |
| C | 0.56696229  | 0.90597987  | -0.14453993 |
| C | 2.09395266  | 0.79527813  | 0.09014743  |
| C | 2.98886164  | -0.25757592 | 0.00524344  |
| H | 3.09261022  | -2.45212357 | -0.16914541 |
| H | 0.47975893  | -2.46864079 | -0.10437920 |
| H | 2.40825660  | 1.79045873  | 0.39407373  |
| H | 4.05144778  | -0.04367742 | 0.01093817  |
| O | -0.06628941 | 1.93630571  | -0.32158294 |
| H | -1.76472957 | 1.49847126  | -0.19953060 |
| N | -2.25936416 | -0.29834705 | 0.04180521  |
| O | -2.62983232 | 1.02185980  | -0.09550464 |
| O | -3.18076176 | -1.02103590 | 0.17781155  |

TS4 (S<sub>0</sub>, gas)

|   |            |             |             |
|---|------------|-------------|-------------|
| C | 2.10156500 | -1.58033400 | -0.04770700 |
| C | 0.72650900 | -1.38483500 | -0.09088200 |
| C | 0.32435000 | -0.09128400 | 0.09692700  |
| C | 0.66728600 | 1.20436600  | -0.10479000 |
| C | 2.15229400 | 0.81338800  | 0.17259000  |

|   |             |             |             |
|---|-------------|-------------|-------------|
| C | 2.82415600  | -0.38311700 | 0.09975000  |
| H | 2.55304900  | -2.55439900 | -0.17211700 |
| H | -0.00143200 | -2.16102900 | -0.28933800 |
| H | 2.64352000  | 1.74854500  | 0.42365500  |
| H | 3.90534100  | -0.37994500 | 0.18349200  |
| O | 0.27787200  | 2.34487700  | -0.23297900 |
| H | -3.84742900 | 0.42114400  | 0.33176000  |
| N | -2.15140600 | -0.33374600 | -0.07032200 |
| O | -2.93941100 | 0.75558400  | 0.16805900  |
| O | -2.70973300 | -1.37636100 | -0.02764700 |

TS5 (S<sub>0</sub>, gas)

|   |             |             |             |
|---|-------------|-------------|-------------|
| C | -2.08392872 | -1.66242474 | -0.02632768 |
| C | -0.71347453 | -1.42328750 | -0.02564286 |
| C | -0.36631179 | -0.10697971 | -0.12310429 |
| C | -0.75182806 | 1.16233969  | 0.15776781  |
| C | -2.23361381 | 0.73955249  | -0.05529168 |
| C | -2.85397117 | -0.48669039 | -0.04767002 |
| H | -2.49538675 | -2.65978193 | 0.03801146  |
| H | 0.04766848  | -2.18532728 | 0.07791036  |
| H | -2.77437914 | 1.67039544  | -0.19733947 |
| H | -3.93734226 | -0.52144844 | -0.07982999 |
| O | -0.38711613 | 2.30621129  | 0.33469434  |
| H | 3.63989960  | -1.28462131 | -0.01213694 |
| N | 2.14712946  | -0.06793430 | -0.04452276 |
| O | 2.93388750  | 0.74849048  | -0.34331171 |
| O | 2.67575445  | -1.34785119 | 0.14875075  |

2-NP·1W\_1 (S<sub>0</sub>, gas)

|   |            |             |             |
|---|------------|-------------|-------------|
| C | 2.57813500 | -1.35772800 | 0.01494700  |
| C | 1.20386300 | -1.45251500 | -0.00038700 |
| C | 0.42050600 | -0.28462900 | -0.00892200 |
| C | 1.02486500 | 0.99813500  | -0.00198500 |
| C | 2.42415300 | 1.06483900  | 0.01392500  |
| C | 3.18466400 | -0.08990400 | 0.02210700  |
| H | 3.18366900 | -2.25470400 | 0.02141400  |
| H | 0.70881600 | -2.41338900 | -0.00587900 |
| H | 2.88601300 | 2.04438800  | 0.01903500  |

|   |             |             |             |
|---|-------------|-------------|-------------|
| H | 4.26543500  | -0.01101400 | 0.03413000  |
| O | 0.34716100  | 2.16034400  | -0.00988300 |
| H | -3.65423600 | 0.25672600  | 0.01864700  |
| N | -1.00672200 | -0.43080400 | -0.02373300 |
| O | -1.50988500 | -1.54997100 | -0.02580000 |
| O | -1.71540200 | 0.60348000  | -0.03397300 |
| O | -4.62037200 | 0.15691300  | 0.04570200  |
| H | -0.61127500 | 1.95605500  | -0.02160300 |
| H | -4.76049400 | -0.79774800 | 0.05390800  |

2-NP·1W\_2 (S<sub>0</sub>, gas)

|   |             |             |             |
|---|-------------|-------------|-------------|
| C | -2.98602900 | 0.31109000  | 0.01076600  |
| C | -1.84070300 | 1.07771600  | 0.00814300  |
| C | -0.58004900 | 0.45623600  | -0.00051900 |
| C | -0.46447100 | -0.95667200 | -0.00843200 |
| C | -1.64473900 | -1.71138800 | -0.00881100 |
| C | -2.88018200 | -1.08937300 | 0.00164300  |
| H | -3.95759100 | 0.78805600  | 0.02032100  |
| H | -1.89074500 | 2.15744600  | 0.01473100  |
| H | -1.55835900 | -2.79095300 | -0.01658600 |
| H | -3.77756600 | -1.69708700 | 0.00250000  |
| O | 0.70094200  | -1.62846700 | -0.01729100 |
| H | 3.78968100  | -0.27870600 | -0.01964000 |
| N | 0.58605400  | 1.29426300  | -0.00158600 |
| O | 0.45941100  | 2.51662900  | -0.01453500 |
| O | 1.71442300  | 0.75723800  | 0.01308700  |
| O | 4.50441300  | -0.91960700 | 0.08228200  |
| H | 1.43237300  | -0.97460500 | -0.01562400 |
| H | 5.20334800  | -0.59598700 | -0.49968300 |

2-NP·2W (S<sub>0</sub>, gas)

|   |            |             |             |
|---|------------|-------------|-------------|
| C | 2.90897600 | -1.15830800 | -0.40346100 |
| C | 1.57923900 | -1.45641600 | -0.17407200 |
| C | 0.67868000 | -0.43380500 | 0.14717600  |
| C | 1.07210700 | 0.92309300  | 0.18058200  |
| C | 2.43173900 | 1.19245300  | -0.05415800 |
| C | 3.32998400 | 0.17660100  | -0.33006200 |
| H | 3.61326700 | -1.94851800 | -0.62993700 |

|   |             |             |             |
|---|-------------|-------------|-------------|
| H | 1.21097600  | -2.47299400 | -0.21135400 |
| H | 2.74262200  | 2.22957100  | -0.02933600 |
| H | 4.37110000  | 0.42370200  | -0.50453400 |
| O | 0.27406600  | 1.97314500  | 0.38347100  |
| H | -4.40975200 | -0.67893900 | 0.14474800  |
| N | -0.68030700 | -0.82536300 | 0.48615900  |
| O | -1.16178100 | -1.81788000 | -0.07506500 |
| O | -1.28461600 | -0.16734000 | 1.32447300  |
| O | -3.77939100 | -0.60183200 | -0.57877000 |
| H | -3.08678800 | -1.25472800 | -0.38317300 |
| H | -0.68170700 | 1.78229500  | 0.24072800  |
| O | -2.26129300 | 1.74261700  | -0.58465800 |
| H | -2.87522800 | 0.97845800  | -0.58291800 |
| H | -2.42256700 | 2.22730300  | -1.39897500 |

2-NP-HT1·1W (S<sub>0</sub>, gas)

|   |             |             |             |
|---|-------------|-------------|-------------|
| C | 2.51099300  | -1.39432000 | 0.01962600  |
| C | 1.15434900  | -1.44916900 | 0.00294000  |
| C | 0.37839900  | -0.24348500 | -0.00974200 |
| C | 1.03045200  | 1.08550700  | -0.00317000 |
| C | 2.48226200  | 1.04047600  | 0.01395700  |
| C | 3.17933700  | -0.12590500 | 0.02462300  |
| H | 3.09310900  | -2.30705300 | 0.02848200  |
| H | 0.63371900  | -2.39627600 | -0.00168000 |
| H | 2.98563700  | 2.00019900  | 0.01773200  |
| H | 4.26367500  | -0.10479300 | 0.03713700  |
| O | 0.42729300  | 2.17797100  | -0.01023700 |
| H | -2.71822800 | 0.38855300  | -0.03506800 |
| N | -0.97142800 | -0.40118300 | -0.02584300 |
| O | -1.73700800 | 0.70235500  | -0.04848700 |
| O | -1.54864400 | -1.49552600 | -0.02322300 |
| O | -4.24138000 | 0.11768400  | -0.03788100 |
| H | -4.68248600 | 0.55695600  | 0.70234600  |
| H | -4.39226300 | -0.82780600 | 0.10117700  |

2-NP-HT2·1W (S<sub>0</sub>, gas)

|   |            |             |             |
|---|------------|-------------|-------------|
| C | 2.14734400 | -1.71404000 | 0.00470100  |
| C | 0.81297100 | -1.45755600 | -0.00813600 |



|   |             |             |             |
|---|-------------|-------------|-------------|
| C | 0.34338300  | -0.10345800 | -0.00748500 |
| C | 1.28645500  | 1.03695600  | 0.00551400  |
| C | 2.68718000  | 0.66202900  | 0.01800200  |
| C | 3.09157300  | -0.63597100 | 0.01791400  |
| H | 2.50332800  | -2.73642400 | 0.00510500  |
| H | 0.09488400  | -2.26398200 | -0.01817100 |
| H | 3.39994100  | 1.47831400  | 0.02794400  |
| H | 4.15081100  | -0.86886800 | 0.02811900  |
| O | 0.93696800  | 2.23567000  | 0.00568400  |
| H | -2.76077900 | -0.62961800 | -0.03263700 |
| N | -0.99032400 | 0.13799000  | -0.02115000 |
| O | -1.54060800 | 1.23762200  | -0.01850400 |
| O | -1.79073700 | -0.96283300 | -0.04139000 |
| O | -4.29254500 | -0.32878300 | -0.04791700 |
| H | -4.42595900 | 0.62130600  | 0.07646700  |
| H | -4.74802900 | -0.74783000 | 0.69517900  |

TS3·1W (S<sub>0</sub>, gas)

|   |             |             |             |
|---|-------------|-------------|-------------|
| C | -3.06979500 | -0.87022700 | 0.24549500  |
| C | -1.75800300 | -1.33654300 | 0.21665000  |
| C | -0.84122700 | -0.39256700 | -0.13271400 |
| C | -0.52630100 | 0.91757800  | -0.09578600 |
| C | -2.02912800 | 1.24151300  | -0.24249100 |
| C | -3.16974500 | 0.50587000  | -0.00721700 |
| H | -3.90395900 | -1.50504900 | 0.50882800  |
| H | -1.44049000 | -2.33037400 | 0.50299000  |
| H | -2.05847900 | 2.25757800  | -0.62586500 |
| H | -4.12896200 | 1.00863400  | -0.05274500 |
| O | 0.36235900  | 1.75627700  | -0.16953700 |
| H | 2.63081600  | -0.21181600 | 0.75094400  |
| N | 1.54251700  | -1.50974500 | -0.19577200 |
| O | 2.19213700  | -1.25362400 | -1.15783100 |
| O | 1.96704600  | -0.94225600 | 0.96426200  |
| O | 3.06416000  | 1.39804300  | 0.42861700  |
| H | 2.16514500  | 1.70773500  | 0.19570500  |
| H | 3.61789200  | 1.58025000  | -0.33716200 |

TS4·1W (S<sub>0</sub>, gas)

|   |             |             |             |
|---|-------------|-------------|-------------|
| C | 2.69665100  | -1.65231200 | 0.02127500  |
| C | 1.33859600  | -1.36403700 | 0.02553700  |
| C | 1.02766700  | -0.04350200 | -0.17299200 |
| C | 1.42340500  | 1.21733000  | 0.11243300  |
| C | 2.88751300  | 0.73124100  | -0.17512700 |
| C | 3.49459400  | -0.50028700 | -0.09704900 |
| H | 3.08302800  | -2.65251500 | 0.15804700  |
| H | 0.55120800  | -2.08261900 | 0.21400700  |
| H | 3.42830200  | 1.63602000  | -0.43506900 |
| H | 4.57558400  | -0.55767100 | -0.16299300 |
| O | 1.11318600  | 2.37468100  | 0.28196000  |
| H | -3.23145800 | 0.50273000  | -0.18414700 |
| N | -1.47951000 | -0.23276200 | 0.06138000  |
| O | -2.28112300 | 0.81409100  | -0.19428200 |
| O | -2.03059200 | -1.27781100 | 0.23019100  |
| O | -4.88288100 | -0.04140300 | -0.14996200 |
| H | -5.64507600 | 0.44354000  | 0.18361400  |
| H | -4.96429900 | -0.94722500 | 0.16915100  |

TS5·1W (S<sub>0</sub>, gas)

|   |             |             |             |
|---|-------------|-------------|-------------|
| C | 2.52169300  | -1.78877600 | 0.00010200  |
| C | 1.19635700  | -1.37694100 | -0.06520800 |
| C | 1.02201800  | -0.02695800 | -0.21386700 |
| C | 1.51780300  | 1.18103400  | 0.13739600  |
| C | 2.94645700  | 0.57369400  | -0.06258000 |
| C | 3.42766100  | -0.71371300 | -0.00920300 |
| H | 2.80512000  | -2.82603900 | 0.11029500  |
| H | 0.33692100  | -2.02581900 | 0.03994900  |
| H | 3.58797000  | 1.43220200  | -0.23657000 |
| H | 4.50056500  | -0.87188200 | -0.00723600 |
| O | 1.29700400  | 2.35669200  | 0.32928900  |
| H | -3.11705700 | -0.81107300 | 0.20001100  |
| N | -1.50524900 | 0.20328200  | -0.13336200 |
| O | -2.22385900 | 1.09063000  | -0.44637500 |
| O | -2.12978600 | -0.95237200 | 0.24985000  |
| O | -4.81238800 | -0.41029900 | 0.06539200  |
| H | -4.88135700 | 0.52843100  | -0.14549500 |
| H | -5.53512700 | -0.61603100 | 0.66749300  |

2-NP-HT1 (T<sub>1</sub>, gas)

|   |             |             |             |
|---|-------------|-------------|-------------|
| C | -1.93413700 | -1.38109700 | 0.05665900  |
| C | -0.51987900 | -1.44074600 | 0.03425300  |
| C | 0.22215200  | -0.27907600 | -0.00510200 |
| C | -0.45208000 | 1.02192800  | -0.04620700 |
| C | -1.89091800 | 1.02055600  | -0.01299400 |
| C | -2.61664600 | -0.15847100 | 0.03792500  |
| H | -2.49241600 | -2.31229600 | 0.08662700  |
| H | -0.00115300 | -2.39158500 | 0.04152200  |
| H | -2.36910200 | 1.99464200  | -0.03270700 |
| H | -3.70155700 | -0.13775800 | 0.05729900  |
| O | 0.19476500  | 2.11080800  | -0.11496300 |
| H | 1.79356800  | 1.51809600  | 0.07075400  |
| N | 1.62982400  | -0.36149500 | -0.10860900 |
| O | 2.39431800  | 0.74746900  | 0.26306700  |
| O | 2.22478500  | -1.46317700 | -0.12940700 |

TS1 (T<sub>1</sub>, gas)

|   |             |             |             |
|---|-------------|-------------|-------------|
| C | -1.86814700 | -1.43304200 | 0.15419500  |
| C | -0.45661200 | -1.42480500 | 0.07552700  |
| C | 0.21505100  | -0.23283200 | -0.05097600 |
| C | -0.49649300 | 1.04142000  | -0.14204600 |
| C | -1.93896100 | 0.97093800  | -0.02663800 |
| C | -2.59937300 | -0.23604900 | 0.11435900  |
| H | -2.38579200 | -2.38318100 | 0.24683600  |
| H | 0.10906800  | -2.34986200 | 0.10332300  |
| H | -2.47080700 | 1.91562000  | -0.08181000 |
| H | -3.68309100 | -0.26355000 | 0.18176800  |
| O | 0.09491800  | 2.12934600  | -0.34168500 |
| H | 3.06645900  | 0.87099200  | 0.41641800  |
| N | 1.63951600  | -0.22847500 | -0.17777200 |
| O | 2.23138600  | 0.58797300  | 0.83292100  |
| O | 2.26804000  | -1.25537800 | -0.53731800 |

2-NP-HT2 (T<sub>1</sub>, gas)

|   |             |             |            |
|---|-------------|-------------|------------|
| C | -1.86814700 | -1.43304200 | 0.15419500 |
| C | -0.45661200 | -1.42480500 | 0.07552700 |

|   |             |             |             |
|---|-------------|-------------|-------------|
| C | 0.21505100  | -0.23283200 | -0.05097600 |
| C | -0.49649300 | 1.04142000  | -0.14204600 |
| C | -1.93896100 | 0.97093800  | -0.02663800 |
| C | -2.59937300 | -0.23604900 | 0.11435900  |
| H | -2.38579200 | -2.38318100 | 0.24683600  |
| H | 0.10906800  | -2.34986200 | 0.10332300  |
| H | -2.47080700 | 1.91562000  | -0.08181000 |
| H | -3.68309100 | -0.26355000 | 0.18176800  |
| O | 0.09491800  | 2.12934600  | -0.34168500 |
| H | 3.06645900  | 0.87099200  | 0.41641800  |
| N | 1.63951600  | -0.22847500 | -0.17777200 |
| O | 2.23138600  | 0.58797300  | 0.83292100  |
| O | 2.26804000  | -1.25537800 | -0.53731800 |

TS2 (T<sub>1</sub>, gas)

|   |             |             |             |
|---|-------------|-------------|-------------|
| C | -1.83136500 | -1.49293700 | -0.09448500 |
| C | -0.41699000 | -1.41678200 | -0.02062700 |
| C | 0.19572500  | -0.18991600 | 0.05846200  |
| C | -0.57217400 | 1.05486200  | 0.09234500  |
| C | -2.00697400 | 0.90921800  | -0.01582900 |
| C | -2.61473500 | -0.33468200 | -0.10136200 |
| H | -2.30138800 | -2.47047100 | -0.14360400 |
| H | 0.18960600  | -2.31520400 | -0.01970900 |
| H | -2.58110500 | 1.83033300  | -0.00713500 |
| H | -3.69611600 | -0.41240000 | -0.16391300 |
| O | -0.03033100 | 2.17779300  | 0.22595700  |
| H | 3.08032100  | -0.35370200 | -0.33244000 |
| N | 1.60728000  | -0.11762900 | 0.17556200  |
| O | 2.36545600  | 0.70712900  | -0.54033300 |
| O | 2.35697600  | -1.21413800 | 0.30523100  |

2-NP-HT3 (T<sub>1</sub>, gas)

|   |             |             |             |
|---|-------------|-------------|-------------|
| C | 1.74956200  | -1.53357400 | 0.13026800  |
| C | 0.34261800  | -1.40766600 | 0.07559500  |
| C | -0.22872200 | -0.16117200 | -0.03146100 |
| C | 0.59015800  | 1.05173900  | -0.11753300 |
| C | 2.02246100  | 0.85509200  | -0.02444500 |
| C | 2.58072900  | -0.40399000 | 0.08910800  |

|   |             |             |             |
|---|-------------|-------------|-------------|
| H | 2.18473400  | -2.52572100 | 0.20563400  |
| H | -0.28864100 | -2.28713500 | 0.11159400  |
| H | 2.62977400  | 1.75342300  | -0.07309000 |
| H | 3.65904800  | -0.52459300 | 0.13808500  |
| O | 0.09408400  | 2.18889900  | -0.29011200 |
| H | -3.21169800 | -1.01550600 | -0.11375400 |
| N | -1.64672700 | 0.01531800  | -0.09372400 |
| O | -2.24886700 | 0.76546700  | 0.71487600  |
| O | -2.31858800 | -1.19315100 | -0.46746300 |

TS3a (T<sub>1</sub>, gas)

|   |             |             |             |
|---|-------------|-------------|-------------|
| C | 2.26617300  | -1.34977600 | 0.05819000  |
| C | 0.86820300  | -1.52026700 | 0.12929700  |
| C | 0.09083800  | -0.40207100 | 0.09475100  |
| C | 0.59208300  | 0.94362000  | -0.01566300 |
| C | 2.04150800  | 1.06236500  | -0.08089600 |
| C | 2.83403900  | -0.05702000 | -0.04391500 |
| H | 2.91395100  | -2.21960800 | 0.07385600  |
| H | 0.43643300  | -2.51353700 | 0.19867200  |
| H | 2.45393300  | 2.06257900  | -0.15045400 |
| H | 3.91238800  | 0.04135600  | -0.09356800 |
| O | -0.15726600 | 1.95214700  | -0.05118300 |
| H | -1.83947100 | 1.42158300  | 0.14199600  |
| N | -2.16564500 | -0.35777500 | -0.31514000 |
| O | -2.58993300 | 0.79574100  | 0.31820400  |
| O | -2.86214900 | -1.29151900 | -0.11891000 |

TS4a (T<sub>1</sub>, gas)

|   |             |             |             |
|---|-------------|-------------|-------------|
| C | -1.95210900 | -1.57629600 | 0.06553100  |
| C | -0.55221200 | -1.40373600 | -0.01975200 |
| C | -0.07474900 | -0.12817600 | -0.07202900 |
| C | -0.86496300 | 1.08136400  | -0.05674600 |
| C | -2.30549900 | 0.82586000  | 0.03271200  |
| C | -2.81128600 | -0.45309500 | 0.09101600  |
| H | -2.36923600 | -2.57911300 | 0.10659400  |
| H | 0.11745700  | -2.26036000 | -0.04658800 |
| H | -2.94708200 | 1.70253400  | 0.05394900  |
| H | -3.88458800 | -0.60970600 | 0.15634300  |

|   |             |             |             |
|---|-------------|-------------|-------------|
| O | -0.40395600 | 2.24175600  | -0.10812000 |
| H | 3.42207600  | 0.48148200  | 0.95309400  |
| N | 2.29278400  | -0.21798900 | -0.39883600 |
| O | 2.82224500  | 0.86980000  | 0.27317000  |
| O | 2.70381000  | -1.27211000 | 0.00045800  |

TS5a (T<sub>1</sub>, gas)

|   |             |             |             |
|---|-------------|-------------|-------------|
| C | 1.92490400  | -1.58905000 | 0.04598800  |
| C | 0.52648400  | -1.40183700 | -0.00292300 |
| C | 0.06392300  | -0.12391100 | -0.03253700 |
| C | 0.86745400  | 1.07485700  | -0.03317700 |
| C | 2.30616600  | 0.80463200  | 0.02026500  |
| C | 2.79630800  | -0.47751500 | 0.05772700  |
| H | 2.33008200  | -2.59480000 | 0.06810400  |
| H | -0.15160900 | -2.24805000 | -0.02220900 |
| H | 2.95707400  | 1.67200600  | 0.03152800  |
| H | 3.86664300  | -0.64662000 | 0.09521000  |
| O | 0.41740000  | 2.23450500  | -0.07107700 |
| H | -3.35622100 | -1.20671600 | 0.60731400  |
| N | -2.26398300 | 0.07779500  | -0.33798900 |
| O | -2.84016000 | 0.87639500  | 0.30931800  |
| O | -2.66592900 | -1.26633000 | -0.08150100 |

TS3a-1W (T<sub>1</sub>, gas)

|   |             |             |             |
|---|-------------|-------------|-------------|
| C | 2.58097400  | -1.18141600 | 0.12956300  |
| C | 1.18885000  | -1.39294700 | 0.09054200  |
| C | 0.36148300  | -0.31416400 | -0.00116300 |
| C | 0.82811200  | 1.05176400  | -0.06722100 |
| C | 2.27880300  | 1.21194500  | -0.02920200 |
| C | 3.11139100  | 0.12786400  | 0.06900500  |
| H | 3.25101800  | -2.03154300 | 0.19705300  |
| H | 0.78133100  | -2.39912400 | 0.11417200  |
| H | 2.65380700  | 2.22825700  | -0.07347400 |
| H | 4.18587200  | 0.26806600  | 0.09855400  |
| O | 0.08796600  | 2.06155400  | -0.14631900 |
| H | -2.65700100 | 0.33577000  | 0.31632600  |
| N | -1.67234700 | -1.15598700 | -0.32394400 |
| O | -2.62974200 | -0.64810400 | 0.51078000  |

|   |             |             |             |
|---|-------------|-------------|-------------|
| O | -1.59449400 | -2.34295700 | -0.28705300 |
| O | -2.61023100 | 1.92523500  | -0.06591800 |
| H | -2.98898500 | 2.60031400  | 0.50457200  |
| H | -1.64528500 | 2.10607000  | -0.13067500 |

TS4a-1W (T<sub>1</sub>, gas)

|   |             |             |             |
|---|-------------|-------------|-------------|
| C | -2.49971373 | -1.53209221 | -0.17051415 |
| C | -1.10062014 | -1.34900483 | -0.23265123 |
| C | -0.62864013 | -0.07088132 | -0.29382399 |
| C | -1.43112298 | 1.13080219  | -0.31030782 |
| C | -2.87106647 | 0.86599565  | -0.24240370 |
| C | -3.36839450 | -0.41568641 | -0.17536546 |
| H | -2.91018393 | -2.53753715 | -0.12376884 |
| H | -0.42343787 | -2.20011768 | -0.23678478 |
| H | -3.51958157 | 1.73787003  | -0.24461381 |
| H | -4.44152583 | -0.57996708 | -0.12675971 |
| O | -0.98005077 | 2.29503356  | -0.37240844 |
| H | 2.91931407  | 0.51775942  | 0.79140186  |
| N | 1.75237072  | -0.18360302 | -0.56430771 |
| O | 2.29341578  | 0.87396624  | 0.08448087  |
| O | 2.13572954  | -1.27084422 | -0.18388425 |
| O | 3.94048540  | -0.41472038 | 1.84323029  |
| H | 3.57092321  | -1.22004025 | 1.43622418  |
| H | 4.86444068  | -0.38743821 | 1.54760485  |

TS5a-1W (T<sub>1</sub>, gas)

|   |             |             |             |
|---|-------------|-------------|-------------|
| C | 0.74700491  | -2.80708068 | 0.26208856  |
| C | 0.25662643  | -1.65759434 | -0.39246303 |
| C | 0.45739115  | -0.45289441 | 0.20739202  |
| C | 1.14051993  | -0.23387954 | 1.45978977  |
| C | 1.62180409  | -1.46871547 | 2.08341941  |
| C | 1.42483921  | -2.69421779 | 1.49662903  |
| H | 0.60683174  | -3.78282814 | -0.19036451 |
| H | -0.25714438 | -1.73164616 | -1.34485990 |
| H | 2.13578413  | -1.35945615 | 3.03219390  |
| H | 1.79294744  | -3.59190381 | 1.98087348  |
| O | 1.31769387  | 0.87932713  | 1.98923558  |
| H | -1.83718362 | 1.18194141  | -2.15363298 |

|   |             |            |             |
|---|-------------|------------|-------------|
| N | -0.21395214 | 1.37869404 | -1.11428270 |
| O | -0.77980480 | 2.27562274 | -0.57366038 |
| O | -0.95001159 | 0.73871978 | -2.10415636 |
| O | -3.35502256 | 2.13249397 | -2.00480697 |
| H | -3.07974520 | 2.78245060 | -1.34599201 |
| H | -3.85341744 | 2.61054785 | -2.67548469 |

#### A2 (T<sub>1</sub>, gas)

|   |             |             |             |
|---|-------------|-------------|-------------|
| C | -1.77566100 | 0.04463800  | -0.00005000 |
| C | -1.15235500 | -1.22224000 | 0.00002300  |
| C | 0.20751500  | -1.25215700 | 0.00010900  |
| C | 1.08916800  | -0.10967700 | -0.00002800 |
| C | 0.37337800  | 1.16855600  | 0.00006400  |
| C | -0.99857400 | 1.22446900  | 0.00000200  |
| H | -2.85820900 | 0.10911000  | -0.00019000 |
| H | -1.74800800 | -2.12920000 | -0.00009300 |
| H | 0.98721000  | 2.06268600  | 0.00012200  |
| H | -1.50051000 | 2.18551700  | -0.00000400 |
| O | 2.33233500  | -0.16870500 | -0.00006900 |

#### A3 (Doublet, gas)

|   |             |             |             |
|---|-------------|-------------|-------------|
| C | 1.29126900  | -1.62591700 | 0.00037100  |
| C | -0.04855400 | -1.43847100 | 0.00061900  |
| C | -0.56964800 | -0.08963400 | 0.00014400  |
| C | 0.33133300  | 1.10689700  | 0.00030700  |
| C | 1.76176800  | 0.78233700  | -0.00072900 |
| C | 2.19959800  | -0.49839100 | -0.00045100 |
| H | 1.70025900  | -2.62929900 | 0.00076000  |
| H | -0.74719800 | -2.26646700 | 0.00111800  |
| H | 2.44364700  | 1.62408100  | -0.00137400 |
| H | 3.26538600  | -0.70179900 | -0.00091500 |
| O | -0.09670200 | 2.25215800  | 0.00072400  |
| N | -1.85912900 | 0.14708600  | -0.00035500 |
| O | -2.83364700 | -0.56178800 | -0.00055900 |

## 4.2 Photolysis of 4-Nitrophenol in Gas-Phase

4-NP (S<sub>0</sub>, gas)



|   |             |             |             |
|---|-------------|-------------|-------------|
| C | -1.38377700 | -1.20499900 | -0.00020900 |
| C | -0.00027800 | -1.21515000 | -0.00015800 |
| C | 0.69007200  | 0.00016000  | 0.00003700  |
| C | 0.01357400  | 1.22487000  | 0.00021400  |
| C | -1.36837300 | 1.23177300  | 0.00018800  |
| C | -2.06995200 | 0.01789100  | -0.00002700 |
| H | -1.94311200 | -2.13337200 | -0.00037600 |
| H | 0.54000800  | -2.15123400 | -0.00031700 |
| H | -1.91848700 | 2.16425100  | 0.00032400  |
| N | 2.13673300  | -0.00833300 | -0.00008900 |
| O | 2.73928700  | 1.07099200  | -0.00008300 |
| H | 0.56590800  | 2.15379100  | 0.00037500  |
| O | 2.72747700  | -1.09421700 | 0.00019900  |
| O | -3.42654600 | 0.08580300  | -0.00005300 |
| H | -3.81079200 | -0.80299200 | -0.00016700 |

4-NP·1W\_1 (S<sub>0</sub>, gas)

|   |             |             |             |
|---|-------------|-------------|-------------|
| C | 1.96472700  | -1.26308900 | -0.00001200 |
| C | 0.58605400  | -1.16068200 | -0.00036900 |
| C | -0.00345200 | 0.10770100  | -0.00039900 |
| C | 0.77109100  | 1.27363800  | -0.00007600 |
| C | 2.14812100  | 1.16771000  | 0.00027800  |
| C | 2.74852100  | -0.10001200 | 0.00030800  |
| H | 2.44361400  | -2.23540200 | 0.00002700  |
| H | -0.02925500 | -2.04936800 | -0.00061500 |
| H | 2.77215700  | 2.05245800  | 0.00052400  |
| N | -1.44161100 | 0.21845100  | -0.00078700 |
| O | -1.95961000 | 1.33807100  | -0.00068700 |
| H | 0.29593400  | 2.24451500  | -0.00011400 |
| O | -2.11859100 | -0.82139600 | -0.00119100 |
| O | 4.10433700  | -0.14530300 | 0.00067700  |
| H | 4.41138900  | -1.06357400 | 0.00060400  |
| O | -5.01093700 | -0.44744700 | 0.00171800  |
| H | -4.04113500 | -0.52448000 | 0.00067900  |
| H | -5.17339900 | 0.50368700  | 0.00188800  |

4-NP·1W\_2 (S<sub>0</sub>, gas)

|   |             |            |            |
|---|-------------|------------|------------|
| C | -1.37956800 | 1.19818500 | 0.48396600 |
|---|-------------|------------|------------|

|   |             |             |             |
|---|-------------|-------------|-------------|
| C | -0.07617300 | 0.74310700  | 0.55898700  |
| C | 0.21877500  | -0.55381900 | 0.12747300  |
| C | -0.77584300 | -1.40017800 | -0.37686000 |
| C | -2.07592400 | -0.94028800 | -0.45597500 |
| C | -2.38117500 | 0.35935400  | -0.02559000 |
| H | -1.63384800 | 2.19756800  | 0.81784400  |
| H | 0.70309800  | 1.37909600  | 0.95462600  |
| H | -2.86433900 | -1.57101600 | -0.84683900 |
| N | 1.57715700  | -1.03264600 | 0.20560500  |
| O | 1.81346700  | -2.21331100 | -0.06434400 |
| H | -0.52641200 | -2.39901500 | -0.70624100 |
| O | 2.47276500  | -0.24493700 | 0.54612000  |
| O | -3.67413900 | 0.75986100  | -0.12277200 |
| H | -3.77267700 | 1.66738200  | 0.20097800  |
| O | 3.03156100  | 2.40843600  | -0.66970500 |
| H | 2.78263600  | 1.55515900  | -0.28089100 |
| H | 3.94166300  | 2.28078700  | -0.96512200 |

4-NP-2W (S<sub>0</sub>, gas)

|   |             |             |             |
|---|-------------|-------------|-------------|
| C | -0.22249800 | -0.53457700 | 0.08038700  |
| C | -2.25629000 | 0.13487100  | 1.15323500  |
| C | -2.87826800 | 0.19956400  | -0.09953400 |
| C | -2.16113300 | -0.10351800 | -1.26314100 |
| C | -0.82882400 | -0.46673200 | -1.17436300 |
| H | -2.81373200 | 0.37898800  | 2.05173300  |
| H | -2.66274600 | -0.04322900 | -2.22049800 |
| O | -4.18033600 | 0.55324000  | -0.25077200 |
| H | -4.57634100 | 0.75097300  | 0.60523900  |
| C | -0.92304000 | -0.23269900 | 1.24507500  |
| H | -0.25127400 | -0.69657800 | -2.05867400 |
| H | -0.41841000 | -0.27894300 | 2.19983300  |
| N | 1.18131200  | -0.91127200 | 0.17874700  |
| O | 1.68110100  | -1.02994000 | 1.28956400  |
| O | 1.80497600  | -1.09607900 | -0.87266700 |
| O | 4.22691000  | 0.39783000  | -0.40812500 |
| H | 4.69773100  | 0.08462500  | 0.37068500  |
| H | 3.61394200  | -0.32045800 | -0.63639900 |
| O | 2.06511500  | 2.16139200  | 0.14748500  |

H 2.90461000 1.69883800 -0.03000000  
H 2.07521900 2.93168600 -0.42698100

4-NP\* (T<sub>1</sub>, gas)

C -1.40229500 1.20119500 0.00242200  
C -0.01542700 1.21481600 0.03681700  
C 0.67882600 -0.00057800 0.04964300  
C -0.00853700 -1.22343600 0.04036200  
C -1.39185900 -1.22420100 0.00553700  
C -2.09547200 -0.01405500 -0.01214300  
H -1.94785900 2.13931500 -0.01606400  
H 0.53094200 2.14908700 0.04357400  
H -1.94676000 -2.15375200 -0.01067400  
N 2.07202600 0.00493000 0.13730600  
O 2.83043500 -1.03273300 -0.09050400  
H 0.54674700 -2.15252500 0.05032500  
O 2.82091600 1.05228200 -0.07854700  
O -3.45647200 -0.08666100 -0.04431700  
H -3.83771000 0.79780900 -0.05718600

4-NP\*·1W (T<sub>1</sub>, gas)

C -1.33009500 1.24443300 -0.20597300  
C -0.01976800 0.79414600 -0.27040800  
C 0.23288800 -0.57440700 -0.10827900  
C -0.81416500 -1.48481000 0.10697400  
C -2.11517800 -1.02022000 0.16991900  
C -2.38001200 0.34582100 0.01175400  
H -1.53424600 2.30473900 -0.31592100  
H 0.79353200 1.49417900 -0.41749700  
H -2.94074600 -1.69923400 0.34167400  
H -0.59666800 -2.53833100 0.22845000  
O -3.68268700 0.73811600 0.08278400  
H -3.74989500 1.69198000 -0.03443500  
N 1.53651100 -1.05950700 -0.22031600  
O 1.93082600 -2.22941600 0.21482500  
O 2.61487600 -0.32576200 -0.26947600  
O 2.79145100 2.53978400 0.35470500  
H 2.99163700 1.59497700 0.40267300

H 3.60305600 2.95669000 0.05064700

TS(4-NP\*-B2) (T<sub>1</sub>, gas)

C -1.37548400 1.18691000 -0.18625800  
C -0.02811300 1.34996600 -0.04539600  
C 0.85845000 0.20180800 0.26002400  
C 0.18903100 -1.11736200 0.35002500  
C -1.15576600 -1.23369200 0.20568900  
C -1.96117200 -0.09468200 -0.07386800  
H -2.00899800 2.04867700 -0.37794000  
H 0.44199200 2.32277500 -0.10707700  
H -1.64955100 -2.19219800 0.31632000  
H 0.81472900 -1.96857600 0.58565700  
O -3.29431400 -0.30793600 -0.20166300  
H -3.75325600 0.52171200 -0.37767000  
N 2.15876400 0.25193500 -0.50672600  
O 2.84693400 -0.66255200 -0.88141800  
O 1.93263600 0.43878400 1.13889300

TS(4-NP\*·1W-B2) (T<sub>1</sub>, gas)

C 2.01369500 0.92348700 -0.51229900  
C 0.72514900 1.35857200 -0.62855300  
C -0.40644900 0.52512600 -0.16927600  
C -0.05240200 -0.78041400 0.42963600  
C 1.24388100 -1.17425700 0.51807400  
C 2.29874800 -0.33345800 0.06664100  
H 2.82903700 1.54295300 -0.87543700  
H 0.47879800 2.30850800 -1.08453300  
H 1.50251800 -2.14839300 0.91643400  
H -0.87003100 -1.42499100 0.72825800  
O 3.55954400 -0.81139400 0.20217100  
H 4.20020800 -0.17993300 -0.14544800  
N -1.48510000 1.31716200 0.50491300  
O -2.24443000 0.99617800 1.38152500  
O -1.59252600 0.57351600 -0.97251000  
O -2.98250900 -1.94736100 -0.60470600  
H -3.93004100 -1.85141000 -0.47314100  
H -2.67116500 -1.06872100 -0.87769400

TS(4-NP\*-B1) (T<sub>1</sub>, gas)

|   |             |             |             |
|---|-------------|-------------|-------------|
| C | 1.40501400  | -1.19517300 | 0.18548500  |
| C | 0.01168400  | -1.13845000 | 0.23540400  |
| C | -0.55717300 | 0.09720900  | 0.04889400  |
| C | 0.11736800  | 1.28834900  | -0.10623100 |
| C | 1.50798700  | 1.21684000  | -0.15728400 |
| C | 2.14623400  | -0.02074800 | -0.00903600 |
| H | 1.91250100  | -2.14986300 | 0.28941700  |
| H | -0.59391400 | -2.02744800 | 0.36975300  |
| H | 2.10948900  | 2.10581900  | -0.30350200 |
| H | -0.40438800 | 2.23234700  | -0.19727400 |
| O | 3.50726000  | -0.02146800 | -0.06425700 |
| H | 3.84662800  | -0.91489000 | 0.05718200  |
| N | -2.47661300 | 0.07157000  | -0.29909000 |
| O | -2.80270600 | 0.95067600  | 0.54259000  |
| O | -2.86964200 | -1.08359800 | -0.39150100 |

TS(4-NP\*·1W-B1) (T<sub>1</sub>, gas)

|   |             |             |             |
|---|-------------|-------------|-------------|
| C | 1.44597100  | 1.23112000  | -0.08460800 |
| C | 0.11712700  | 0.82354500  | -0.19245200 |
| C | -0.10779300 | -0.53403900 | -0.12277400 |
| C | 0.85894300  | -1.51811000 | -0.07297500 |
| C | 2.18050200  | -1.09546100 | 0.03323600  |
| C | 2.46896400  | 0.27631300  | 0.02904100  |
| H | 1.68748000  | 2.29023200  | -0.08916000 |
| H | -0.69012600 | 1.54359700  | -0.28981800 |
| H | 2.99427400  | -1.80557300 | 0.11660600  |
| H | 0.60238300  | -2.57031000 | -0.08501000 |
| O | 3.77854500  | 0.62825200  | 0.13090300  |
| H | 3.86934000  | 1.58752600  | 0.11303700  |
| N | -1.93311900 | -1.16704800 | 0.33079600  |
| O | -2.18176600 | -1.72126000 | -0.76221400 |
| O | -2.59672200 | -0.31985000 | 0.91824100  |
| O | -2.77430800 | 2.39510300  | -0.17445400 |
| H | -3.01190200 | 1.55232200  | 0.23881800  |
| H | -3.50789700 | 2.61339000  | -0.75665700 |

B2 (Double, gas)

|   |             |             |             |
|---|-------------|-------------|-------------|
| C | 0.64439400  | 1.21447400  | -0.00002100 |
| C | -1.50342300 | 0.00800400  | -0.00026000 |
| C | -0.74795600 | -1.23315500 | -0.00006000 |
| C | 0.62168300  | -1.23944000 | -0.00004700 |
| C | 1.33014300  | -0.01834300 | -0.00002700 |
| H | 1.21188300  | 2.14133500  | 0.00009000  |
| H | 1.18848300  | -2.16308700 | 0.00004800  |
| H | -1.31615800 | -2.15577400 | 0.00003300  |
| O | 2.68260800  | -0.09435400 | 0.00011700  |
| H | 3.06952500  | 0.78886700  | -0.00005700 |
| O | -2.75461000 | 0.02163900  | 0.00022400  |
| C | -0.72806400 | 1.23541700  | -0.00003700 |
| H | -1.27838200 | 2.16863300  | -0.00012900 |

TS(B2-B6) (Doublet, gas)

|   |             |             |             |
|---|-------------|-------------|-------------|
| C | -0.78324565 | 0.99622810  | 0.50633860  |
| C | 1.11927306  | -0.51341527 | 0.20904216  |
| C | 0.24565481  | -1.53859664 | -0.15783489 |
| C | -1.11690769 | -1.29602463 | -0.21019492 |
| C | -1.63016311 | -0.01586080 | 0.10170149  |
| H | -1.17538987 | 1.96312140  | 0.80354840  |
| H | -1.81108347 | -2.07171799 | -0.50940087 |
| H | 0.65302148  | -2.50449610 | -0.42910124 |
| O | -2.98572619 | 0.12518737  | 0.01010662  |
| H | -3.23747846 | 1.02988248  | 0.22509716  |
| O | 2.45137491  | -0.72437107 | 0.18161803  |
| H | 2.84375744  | 0.13029978  | -0.07612086 |
| C | 0.61202769  | 0.77313266  | 0.55926686  |
| H | 1.22074569  | 1.42663306  | 1.16683634  |
| O | 1.71816977  | 1.70341380  | -0.91467429 |
| H | 1.21397049  | 1.48721839  | -1.71300865 |

B6 (Doublet, gas)

|   |             |             |             |
|---|-------------|-------------|-------------|
| C | 0.71772600  | -1.06088300 | 0.25349700  |
| C | -1.13268200 | 0.61190400  | 0.11111200  |
| C | -0.21091800 | 1.60466100  | -0.10351600 |
| C | 1.15815400  | 1.30566800  | -0.13641400 |

|   |             |             |             |
|---|-------------|-------------|-------------|
| C | 1.59394800  | -0.04335300 | 0.02527100  |
| H | 1.06169900  | -2.07874800 | 0.40944800  |
| H | 1.89863300  | 2.07326700  | -0.31688000 |
| H | -0.55861100 | 2.61627900  | -0.27736800 |
| O | 2.94986100  | -0.22220800 | -0.06870200 |
| H | 3.16301200  | -1.15239200 | 0.06233800  |
| O | -2.46124700 | 0.88021200  | 0.10385900  |
| H | -2.93091100 | 0.03786100  | 0.01177100  |
| C | -0.74832500 | -0.81556200 | 0.38851500  |
| H | -1.09401900 | -1.07794400 | 1.40125600  |
| O | -1.56412600 | -1.70272500 | -0.43406700 |
| H | -1.20311800 | -1.67516400 | -1.33007800 |

B1 (Doublet, gas)

|   |             |             |             |
|---|-------------|-------------|-------------|
| C | -0.95714500 | -1.20358400 | 0.01451500  |
| C | 0.44286400  | -1.14005000 | 0.05254100  |
| C | 1.00519200  | 0.11225900  | 0.06076800  |
| C | 0.31378700  | 1.30147100  | 0.03814300  |
| C | -1.08175800 | 1.22384200  | 0.00055200  |
| C | -1.70876300 | -0.02567300 | -0.01115800 |
| H | -1.45373500 | -2.16981300 | 0.00393400  |
| H | 1.03586000  | -2.04706300 | 0.07131800  |
| H | -1.69059500 | 2.12000400  | -0.02118500 |
| H | 0.81063000  | 2.26474600  | 0.04538500  |
| O | -3.07749300 | -0.03015000 | -0.04802900 |
| H | -3.40364300 | -0.93596800 | -0.05615300 |

TS(B1-B4) (Doublet, gas)

|   |             |             |             |
|---|-------------|-------------|-------------|
| C | 0.90434500  | 1.20173600  | -0.00625800 |
| C | -0.49223700 | 1.21127200  | -0.04770100 |
| C | -1.16074200 | 0.00078200  | -0.08180900 |
| C | -0.50045900 | -1.21779100 | -0.04813100 |
| C | 0.89273100  | -1.22452200 | -0.00653100 |
| C | 1.59131200  | -0.01456500 | 0.01414200  |
| H | 1.45278100  | 2.13922800  | 0.00907200  |
| H | -1.03180600 | 2.15074400  | -0.06387600 |
| H | 1.44846300  | -2.15439300 | 0.00875800  |
| H | -1.04987700 | -2.15158400 | -0.06615500 |

|   |             |             |             |
|---|-------------|-------------|-------------|
| O | 2.95680500  | -0.08567400 | 0.05714200  |
| H | 3.33212600  | 0.80102800  | 0.06341900  |
| H | -2.40922800 | 0.00903900  | -0.18816100 |
| H | -3.69256000 | -0.02016000 | 0.95321400  |
| O | -3.63925400 | 0.02125300  | -0.01446100 |

B4 (Singlet, gas)

|   |             |             |             |
|---|-------------|-------------|-------------|
| C | -0.26279900 | 1.19768700  | -0.00000400 |
| C | 1.13132300  | 1.21727000  | -0.00004300 |
| C | 1.85511600  | 0.02725800  | 0.00006900  |
| C | 1.16984100  | -1.18882900 | -0.00008000 |
| C | -0.22083300 | -1.22161700 | 0.00009700  |
| C | -0.93810500 | -0.02405100 | 0.00016200  |
| H | -0.82305900 | 2.12836500  | -0.00016200 |
| H | 1.64899800  | 2.16998400  | 0.00002900  |
| H | -0.76393900 | -2.15892200 | 0.00015600  |
| H | 1.72227300  | -2.12188700 | 0.00005100  |
| O | -2.30532900 | -0.11037000 | -0.00028300 |
| H | -2.68724700 | 0.77341000  | 0.00127400  |
| H | 2.93834700  | 0.04569500  | -0.00028300 |

TS(B4-B5a) (Doublet, gas)

|   |             |             |             |
|---|-------------|-------------|-------------|
| C | -0.65918813 | -1.20346412 | -0.23460171 |
| C | 0.67915895  | -1.17998872 | -0.58243186 |
| C | 1.39656504  | 0.04250044  | -0.62547260 |
| C | 0.67573329  | 1.24869582  | -0.41908379 |
| C | -0.66023615 | 1.22821949  | -0.07301027 |
| C | -1.33327732 | 0.00006465  | 0.02397682  |
| H | -1.19369157 | -2.14680765 | -0.17128957 |
| H | 1.20178642  | -2.10561601 | -0.78869250 |
| H | -1.21129448 | 2.14127821  | 0.11628400  |
| H | 1.19852534  | 2.19343367  | -0.50290015 |
| O | -2.64902103 | 0.03963621  | 0.36870988  |
| H | -3.01023984 | -0.85320258 | 0.40143117  |
| H | 2.36037346  | 0.07565846  | -1.11109573 |
| H | 1.78692203  | -0.07423552 | 1.73743385  |
| O | 2.50358041  | -0.09320436 | 1.08480240  |



TS(B4-B5b) (Doublet, gas)

|   |             |             |             |
|---|-------------|-------------|-------------|
| C | 1.04173000  | 1.11706900  | 0.29787200  |
| C | -0.19798100 | 1.73910300  | 0.10821400  |
| C | -1.26795500 | 1.02859400  | -0.40594500 |
| C | -1.12288800 | -0.35853600 | -0.69603900 |
| C | 0.15399200  | -0.96115300 | -0.56370200 |
| C | 1.21152500  | -0.23522200 | -0.04216600 |
| H | 1.87647400  | 1.68106400  | 0.70369100  |
| H | -0.30991600 | 2.78686500  | 0.36192500  |
| H | 0.29904400  | -1.99950200 | -0.83240200 |
| H | -1.85828300 | -0.84324800 | -1.32235200 |
| O | 2.41052300  | -0.87789300 | 0.11113600  |
| H | 3.07446500  | -0.26295600 | 0.43957100  |
| H | -2.23061800 | 1.50039700  | -0.55283800 |
| H | -1.63077800 | -0.83822200 | 1.56877500  |
| O | -2.17688900 | -1.12254800 | 0.81939300  |

TS(B4-B5c) (Doublet, gas)

|   |             |             |             |
|---|-------------|-------------|-------------|
| C | 0.49142229  | 1.38056781  | -0.34073028 |
| C | -0.80515728 | 1.55993446  | -0.81991400 |
| C | -1.66578757 | 0.46522987  | -0.98996895 |
| C | -1.22770168 | -0.80692938 | -0.66455555 |
| C | 0.05574132  | -1.00948893 | -0.10167384 |
| C | 0.93824477  | 0.10054944  | -0.02110798 |
| H | 1.15897958  | 2.23055067  | -0.23661858 |
| H | -1.14371592 | 2.55803950  | -1.07340300 |
| H | 0.47643237  | -2.00186626 | -0.03205994 |
| H | -1.87545481 | -1.66519562 | -0.79552630 |
| O | 2.20206794  | -0.16428593 | 0.38544229  |
| H | 2.69421515  | 0.65637829  | 0.49990731  |
| H | -2.66270621 | 0.61685741  | -1.38579953 |
| H | -1.10071494 | -0.56632906 | 1.96184367  |
| O | -0.38705249 | -1.21872250 | 1.88561522  |

B5a (Doublet, gas)

|   |             |             |             |
|---|-------------|-------------|-------------|
| C | 0.69557800  | -1.21680900 | -0.07872900 |
| C | -0.64980500 | -1.24610200 | -0.30642300 |
| C | -1.48273000 | 0.00059500  | -0.37725200 |

|   |             |             |             |
|---|-------------|-------------|-------------|
| C | -0.66315100 | 1.25083100  | -0.29688800 |
| C | 0.67900100  | 1.23715800  | -0.08227900 |
| C | 1.38149300  | 0.01278400  | 0.04118400  |
| H | 1.25356900  | -2.14667300 | 0.00302800  |
| H | -1.16242100 | -2.19671400 | -0.41147300 |
| H | 1.24212500  | 2.16014200  | -0.00212900 |
| H | -1.19981300 | 2.18857400  | -0.37832800 |
| O | 2.72690000  | 0.08649700  | 0.25957600  |
| H | 3.09561800  | -0.79982000 | 0.34117400  |
| H | -2.06643500 | 0.00600600  | -1.31278000 |
| H | -3.14251100 | -0.59012900 | 0.54178100  |
| O | -2.44970600 | 0.05698700  | 0.71805500  |

B5b (Doublet, gas)

|   |             |             |             |
|---|-------------|-------------|-------------|
| C | 1.16553500  | 1.11090900  | 0.13850100  |
| C | -0.07774400 | 1.78222000  | 0.05544600  |
| C | -1.23624500 | 1.10708700  | -0.18340000 |
| C | -1.25909300 | -0.37427500 | -0.39279200 |
| C | 0.08830600  | -1.01938500 | -0.27515800 |
| C | 1.21790800  | -0.29700000 | -0.02303800 |
| H | 2.07448700  | 1.66897400  | 0.33797900  |
| H | -0.09964700 | 2.85722400  | 0.19804100  |
| H | 0.16010000  | -2.09402400 | -0.40351400 |
| H | -1.65653600 | -0.56989400 | -1.40641400 |
| O | 2.41270000  | -0.96910100 | 0.06775000  |
| H | 3.11724400  | -0.35104900 | 0.28588700  |
| H | -2.19128900 | 1.61724700  | -0.21708000 |
| H | -2.33561500 | -1.85800100 | 0.35106100  |
| O | -2.22029300 | -0.92187600 | 0.54933500  |

B5c (Doublet, gas)

|   |             |             |             |
|---|-------------|-------------|-------------|
| C | 0.46681000  | 1.46826400  | -0.14866400 |
| C | 1.76524800  | 0.91448000  | -0.20024400 |
| C | 1.95067000  | -0.47274200 | 0.02345100  |
| C | 0.89936000  | -1.29743500 | 0.29035700  |
| C | -0.51246500 | -0.80572100 | 0.36072400  |
| C | -0.61123300 | 0.67312300  | 0.11911000  |
| H | 0.32500300  | 2.53167900  | -0.32368100 |

|   |             |             |             |
|---|-------------|-------------|-------------|
| H | 2.61295200  | 1.55147800  | -0.41804600 |
| H | -0.93182800 | -1.01779500 | 1.36059600  |
| H | 1.04108800  | -2.36034100 | 0.44573500  |
| O | -1.90053400 | 1.11609100  | 0.20062600  |
| H | -1.94503100 | 2.05717000  | -0.00440700 |
| H | 2.95346700  | -0.88344400 | -0.02349200 |
| H | -2.21707900 | -1.27534700 | -0.50217700 |
| O | -1.29808000 | -1.55149200 | -0.60099300 |

P1 (Singlet, gas)

|   |             |             |             |
|---|-------------|-------------|-------------|
| C | 0.65378900  | 1.40047100  | 0.00005100  |
| C | 1.87966000  | 0.73181400  | 0.00001900  |
| C | 1.90867100  | -0.66036300 | -0.00006200 |
| C | 0.71917400  | -1.38900100 | -0.00009200 |
| C | -0.50374200 | -0.72787400 | 0.00003400  |
| C | -0.52965700 | 0.67375300  | 0.00009900  |
| H | 0.61861500  | 2.48604300  | 0.00017700  |
| H | 2.80108600  | 1.30133600  | 0.00000800  |
| H | 0.72080600  | -2.47242100 | -0.00025300 |
| O | -1.78926500 | 1.23526000  | 0.00010900  |
| H | -1.73058200 | 2.19548900  | -0.00114900 |
| H | 2.85662500  | -1.18507300 | -0.00015300 |
| H | -2.40533200 | -0.82483300 | -0.00207600 |
| O | -1.66430800 | -1.44442600 | 0.00028600  |

P4 (Singlet, gas)

|   |             |             |             |
|---|-------------|-------------|-------------|
| C | 0.64357700  | 1.06876000  | -0.00000100 |
| C | -0.70999000 | 0.74220300  | 0.00000400  |
| C | -1.12481900 | -0.59278700 | 0.00000600  |
| C | -0.16172800 | -1.59482600 | 0.00000000  |
| C | 1.19567900  | -1.28284600 | -0.00000900 |
| C | 1.59921500  | 0.04975700  | -0.00001000 |
| H | 0.94834000  | 2.11234100  | 0.00000000  |
| H | 1.94636300  | -2.06261300 | -0.00001500 |
| H | -0.49082200 | -2.62693700 | 0.00000200  |
| O | 2.94859300  | 0.30802900  | -0.00001600 |
| H | 3.10212300  | 1.25774800  | -0.00004500 |
| O | -2.45399800 | -0.91997200 | 0.00000800  |

|   |             |             |            |
|---|-------------|-------------|------------|
| O | -1.72263800 | 1.67607700  | 0.00001300 |
| H | -1.36416000 | 2.56847400  | 0.00003000 |
| H | -2.96910500 | -0.10365100 | 0.00005000 |

P5 (Singlet, gas)

|   |             |             |             |
|---|-------------|-------------|-------------|
| C | -0.69826600 | -1.19420200 | -0.00002700 |
| C | 0.69826600  | -1.19420900 | 0.00011700  |
| C | 1.39800800  | 0.00944100  | 0.00003400  |
| C | 0.69425600  | 1.21531700  | -0.00012700 |
| C | -0.69425200 | 1.21531700  | -0.00002200 |
| C | -1.39801400 | 0.00945600  | -0.00002600 |
| H | -1.23370700 | -2.13892200 | -0.00013700 |
| H | 1.23367100  | -2.13894900 | 0.00041300  |
| H | -1.24777100 | 2.14643400  | -0.00011200 |
| H | 1.24776700  | 2.14643300  | -0.00029900 |
| O | -2.77076500 | 0.07752800  | -0.00001900 |
| H | -3.14009800 | -0.81110500 | 0.00029500  |
| H | 3.14013700  | -0.81108200 | -0.00385900 |
| O | 2.77076600  | 0.07753000  | 0.00052000  |

P6 (Singlet, gas)

|   |             |             |             |
|---|-------------|-------------|-------------|
| C | -1.22502100 | 1.07471200  | 0.00013500  |
| C | -0.01975900 | 1.77749400  | -0.00002100 |
| C | 1.20219700  | 1.11662300  | 0.00006000  |
| C | 1.21351900  | -0.28071000 | 0.00000300  |
| C | 0.02226100  | -1.00338700 | -0.00025700 |
| C | -1.19381900 | -0.31990400 | 0.00001600  |
| H | -2.17312100 | 1.60261200  | 0.00043400  |
| H | -0.03846500 | 2.86142700  | 0.00009500  |
| H | 0.01796000  | -2.08823100 | -0.00075100 |
| O | -2.32961900 | -1.08454500 | 0.00022100  |
| H | -3.10381200 | -0.51223900 | -0.00164500 |
| H | 2.14097900  | 1.65512800  | 0.00010200  |
| H | 2.31816600  | -1.85303800 | 0.00401800  |
| O | 2.43487200  | -0.89728300 | -0.00045500 |

### 4.3 Photolysis of 4-Nitrophenol in Aqueous-Phase

4-NP (Singlet, aq)

|   |             |             |             |
|---|-------------|-------------|-------------|
| C | 1.38379000  | 1.20524900  | 0.00007600  |
| C | 0.00075400  | 1.21546000  | 0.00008100  |
| C | -0.69060000 | -0.00016100 | 0.00001300  |
| C | -0.01355800 | -1.22506700 | -0.00005300 |
| C | 1.36795100  | -1.23212100 | -0.00007600 |
| C | 2.07020400  | -0.01797000 | -0.00001500 |
| H | 1.94270600  | 2.13395300  | 0.00015000  |
| H | -0.54037300 | 2.15119300  | 0.00016200  |
| H | 1.91807800  | -2.16461400 | -0.00013800 |
| H | -0.56686100 | -2.15360300 | -0.00009100 |
| O | 3.42590700  | -0.08588800 | -0.00004000 |
| H | 3.81117200  | 0.80235300  | -0.00000500 |
| N | -2.13634100 | 0.00838400  | 0.00000600  |
| O | -2.73901300 | -1.07070700 | 0.00022700  |
| O | -2.72709100 | 1.09405600  | -0.00022200 |

4-NP\* (Triplet, aq)

|   |             |             |             |
|---|-------------|-------------|-------------|
| C | -1.37426700 | -1.23123300 | 0.00010000  |
| C | -0.00999200 | -1.24106100 | 0.00011300  |
| C | 0.70456400  | 0.00161100  | 0.00002400  |
| C | 0.00725700  | 1.24971200  | -0.00005200 |
| C | -1.35671200 | 1.25298100  | -0.00006700 |
| C | -2.07470400 | 0.01447000  | -0.00001100 |
| H | -1.94460200 | -2.15305500 | 0.00020500  |
| H | 0.54429900  | -2.16697600 | 0.00022900  |
| H | -1.92100700 | 2.17711000  | -0.00008600 |
| H | 0.57091800  | 2.16991800  | 0.00000400  |
| O | -3.39827000 | 0.09125300  | -0.00004900 |
| H | -3.81627000 | -0.78731900 | -0.00007100 |
| N | 2.10234600  | -0.00752000 | 0.00001100  |
| O | 2.73698100  | 1.11837000  | 0.00016000  |
| O | 2.72046000  | -1.14286300 | -0.00023500 |

4-NP\*·1W (Triplet, aq)

|   |             |             |             |
|---|-------------|-------------|-------------|
| C | -1.93457300 | -1.29014000 | -0.00003200 |
| C | -0.57413900 | -1.18351500 | -0.00018000 |
| C | 0.02918500  | 0.11473800  | -0.00014800 |

|   |             |             |             |
|---|-------------|-------------|-------------|
| C | -0.76948600 | 1.29886700  | 0.00002200  |
| C | -2.12916600 | 1.18673200  | 0.00015600  |
| C | -2.73772200 | -0.10867100 | 0.00012900  |
| H | -2.42195700 | -2.25827700 | -0.00003400 |
| H | 0.05752100  | -2.05860100 | -0.00030000 |
| H | -2.76954800 | 2.05990400  | 0.00027800  |
| H | -0.28566400 | 2.26349200  | 0.00003000  |
| O | -4.06199000 | -0.14945000 | 0.00027200  |
| H | -4.39659200 | -1.06319300 | 0.00027600  |
| N | 1.42339700  | 0.22590800  | -0.00030000 |
| O | 1.96352500  | 1.39695600  | -0.00031800 |
| O | 2.13631100  | -0.85901000 | -0.00043900 |
| O | 4.90604300  | -0.46123000 | 0.00066000  |
| H | 3.92836100  | -0.54050400 | 0.00026900  |
| H | 5.06839600  | 0.48963000  | 0.00050400  |

TS(4-NP\*-B2) (Triplet,aq)

|   |             |             |             |
|---|-------------|-------------|-------------|
| C | -1.38705000 | 1.18337000  | -0.19003600 |
| C | -0.03825400 | 1.34571800  | -0.07200800 |
| C | 0.83959900  | 0.20049200  | 0.21778300  |
| C | 0.19324700  | -1.11820200 | 0.30804300  |
| C | -1.15591600 | -1.23851900 | 0.19015000  |
| C | -1.96855300 | -0.10035600 | -0.06663000 |
| H | -2.02837300 | 2.03800700  | -0.37828700 |
| H | 0.42593100  | 2.31990600  | -0.15849200 |
| H | -1.63656000 | -2.20364400 | 0.30224200  |
| H | 0.82472100  | -1.97359100 | 0.51271900  |
| O | -3.30450700 | -0.30788600 | -0.17069000 |
| H | -3.76770900 | 0.52800000  | -0.33245400 |
| N | 2.17332000  | 0.25357600  | -0.47029900 |
| O | 2.88014500  | -0.65620600 | -0.84150600 |
| O | 1.93314900  | 0.44925200  | 1.14001400  |

B2 (Triplet,aq)

|   |             |             |             |
|---|-------------|-------------|-------------|
| C | -1.64205700 | 0.99412400  | -0.65886000 |
| C | -0.42675600 | 1.40914700  | -0.18382900 |
| C | 0.34172500  | 0.58996800  | 0.72961500  |
| C | -0.23069200 | -0.68217100 | 1.11744900  |

|   |             |             |             |
|---|-------------|-------------|-------------|
| C | -1.44516800 | -1.08910500 | 0.63751000  |
| C | -2.16274400 | -0.25703800 | -0.25369100 |
| H | -2.21832000 | 1.60781500  | -1.34358400 |
| H | -0.00857900 | 2.36374100  | -0.48150900 |
| H | -1.87812000 | -2.04040600 | 0.92377500  |
| H | 0.33561200  | -1.30414200 | 1.80091100  |
| O | -3.35379900 | -0.71108400 | -0.69309500 |
| H | -3.76183700 | -0.07331700 | -1.29803100 |
| N | 3.65158800  | 0.03384400  | -0.90167500 |
| O | 3.80740800  | -1.08149100 | -0.67931900 |
| O | 1.46692600  | 0.97005700  | 1.17003900  |

TS(4-NP\*·1W-B2) (Triplet,aq)

|   |             |             |             |
|---|-------------|-------------|-------------|
| C | 2.24634900  | 1.01587900  | -0.01853400 |
| C | 0.94726500  | 1.42407600  | -0.08894900 |
| C | -0.14891600 | 0.44555500  | -0.16571300 |
| C | 0.22610000  | -0.97401600 | -0.09312200 |
| C | 1.53300600  | -1.34247000 | -0.02795800 |
| C | 2.56341500  | -0.36302100 | 0.01282000  |
| H | 3.05286100  | 1.74147600  | 0.00598100  |
| H | 0.68264800  | 2.47315400  | -0.12622700 |
| H | 1.81304000  | -2.38956100 | -0.02093000 |
| H | -0.57027900 | -1.70626100 | -0.13734300 |
| O | 3.84004600  | -0.81449400 | 0.06617000  |
| H | 4.46366300  | -0.07236500 | 0.06920300  |
| N | -1.39619700 | 0.85392000  | 0.60102400  |
| O | -2.23114300 | 0.14487900  | 1.11999900  |
| O | -1.24915000 | 0.78049900  | -1.03397600 |
| O | -4.76348200 | -0.74692800 | -0.33341700 |
| H | -4.68168100 | -1.70731700 | -0.38680700 |
| H | -3.96035200 | -0.46423200 | 0.12749900  |

B2·NO·H<sub>2</sub>O (Triplet, aq)

|   |            |             |             |
|---|------------|-------------|-------------|
| C | 2.34934400 | -0.58934300 | -0.80065300 |
| C | 1.20630100 | -1.31667300 | -0.99434300 |
| C | 0.03472500 | -1.10064800 | -0.17453200 |
| C | 0.12087800 | -0.08860300 | 0.85577600  |
| C | 1.26791800 | 0.63185100  | 1.04369700  |

|   |             |             |             |
|---|-------------|-------------|-------------|
| C | 2.39236700  | 0.39095400  | 0.21885100  |
| H | 3.23006000  | -0.74871900 | -1.41401200 |
| H | 1.15036100  | -2.07316300 | -1.76834200 |
| H | 1.34051100  | 1.39038600  | 1.81415600  |
| H | -0.75118900 | 0.08080100  | 1.47575900  |
| O | 3.49293800  | 1.13183900  | 0.45021300  |
| H | 4.20465500  | 0.89311800  | -0.16325500 |
| N | -2.73429200 | 2.60025600  | -0.79748500 |
| O | -2.51821900 | 1.49200300  | -0.59417400 |
| O | -1.02463300 | -1.77590900 | -0.35780500 |
| O | -3.45443900 | -1.28943000 | 0.93263000  |
| H | -2.57863600 | -1.42157400 | 0.51094300  |
| H | -3.65009100 | -0.35589900 | 0.78746100  |

TS(4-NP\*-B1) (Triplet, aq)

|   |             |             |             |
|---|-------------|-------------|-------------|
| C | 1.43230100  | -1.22507800 | 0.11373900  |
| C | 0.14951400  | -1.23092400 | 0.61175200  |
| C | -0.51845700 | 0.00260700  | 0.72377900  |
| C | 0.13467800  | 1.24380500  | 0.60713700  |
| C | 1.41720500  | 1.25086300  | 0.11164800  |
| C | 2.06721500  | 0.01625600  | -0.14848400 |
| H | 1.97380100  | -2.14683700 | -0.07117400 |
| H | -0.35105500 | -2.16315700 | 0.84655600  |
| H | 1.95219900  | 2.17416800  | -0.07667000 |
| H | -0.37823800 | 2.17076700  | 0.83584000  |
| O | 3.31757200  | 0.08225100  | -0.61937000 |
| H | 3.69393800  | -0.80384500 | -0.74607100 |
| N | -2.26598800 | -0.01057100 | -0.35640700 |
| O | -2.85323700 | 1.07364900  | -0.35565900 |
| O | -2.85476700 | -1.09368400 | -0.32635300 |

B1·NO<sub>2</sub> (Triplet, aq)

|   |            |             |             |
|---|------------|-------------|-------------|
| C | 0.96928800 | -0.16229500 | 1.24276900  |
| C | 0.13438900 | 0.96380800  | 1.28149700  |
| C | 0.09983700 | 1.75356400  | 0.15630400  |
| C | 0.81401300 | 1.53007800  | -0.99856000 |
| C | 1.64584300 | 0.40350500  | -1.02578600 |
| C | 1.71477600 | -0.43205200 | 0.09215000  |



|   |             |             |             |
|---|-------------|-------------|-------------|
| H | 1.03733100  | -0.82524900 | 2.09987500  |
| H | -0.44678000 | 1.18259100  | 2.17026900  |
| H | 2.23436200  | 0.17216800  | -1.90661600 |
| H | 0.75173600  | 2.18471900  | -1.86082200 |
| O | 2.55007600  | -1.52968200 | 0.00733600  |
| H | 2.51666100  | -2.03096400 | 0.83353500  |
| N | -2.81871300 | -0.67212500 | -0.40696100 |
| O | -1.79785500 | -1.01109100 | -0.92327000 |
| O | -3.08111900 | 0.00101800  | 0.54371500  |

TS(4-NP\*·1W-B1) (Triplet, aq)

|   |             |             |             |
|---|-------------|-------------|-------------|
| C | 2.03496900  | -1.28598700 | 0.12448600  |
| C | 0.76985300  | -1.17909600 | 0.65472000  |
| C | 0.21247500  | 0.10730600  | 0.76793800  |
| C | 0.95818000  | 1.28936100  | 0.60922800  |
| C | 2.22302000  | 1.18392600  | 0.08096100  |
| C | 2.76153200  | -0.10442300 | -0.17583300 |
| H | 2.49558100  | -2.25098300 | -0.05859800 |
| H | 0.20059800  | -2.06326400 | 0.91702100  |
| H | 2.82597000  | 2.05706500  | -0.13833500 |
| H | 0.52780400  | 2.25840200  | 0.83365600  |
| O | 3.99691400  | -0.15004900 | -0.68384300 |
| H | 4.29154800  | -1.06650300 | -0.81219900 |
| N | -1.57589100 | 0.22721900  | -0.30340100 |
| O | -2.08195800 | 1.34726600  | -0.31207400 |
| O | -2.25011100 | -0.80943700 | -0.25272500 |
| O | -5.12079800 | -0.45590400 | -0.09528900 |
| H | -4.15132500 | -0.54400200 | -0.14748100 |
| H | -5.27149300 | 0.49721600  | -0.08780600 |

B1·NO<sub>2</sub>·H<sub>2</sub>O (Triplet, aq)

|   |            |             |             |
|---|------------|-------------|-------------|
| C | 1.86787600 | -0.87080700 | -0.97186200 |
| C | 1.21632300 | -1.88820400 | -0.25929900 |
| C | 0.86989300 | -1.61560300 | 1.04275600  |
| C | 1.10957400 | -0.43164900 | 1.70182900  |
| C | 1.75951500 | 0.57849100  | 0.98044500  |
| C | 2.13079300 | 0.35067400  | -0.34728100 |
| H | 2.16322800 | -1.02666500 | -2.00461200 |

H 1.00494200 -2.83920300 -0.73568400  
H 1.97549100 1.53565700 1.44194800  
H 0.81691000 -0.26538000 2.73261700  
O 2.76153100 1.38542700 -1.01047300  
H 2.94698900 1.12170200 -1.92179900  
N -1.55600000 1.13057800 0.13558000  
O -2.30950200 1.07557900 1.06057600  
O -1.45228800 0.52012400 -0.88367900  
O -4.47407300 -0.75867900 -0.69843000  
H -3.65433200 -0.68037900 -1.20347000  
H -4.29042100 -0.27681000 0.11844500

TS(4-NP\*·1W-IM1) (Triplet, aq)

C -0.50633400 0.16341600 -0.22740200  
C 1.55864100 -0.99474700 -0.70516000  
C 2.25891000 0.04801900 -0.05453500  
C 1.56709400 1.15605000 0.48965900  
C 0.20066500 1.22178200 0.39416900  
H 2.11193600 -1.82592200 -1.12689800  
H 2.13368400 1.94172700 0.97346400  
O 3.59189700 0.04114200 0.07222000  
H 3.97841100 -0.75811000 -0.32010100  
C 0.19463800 -0.93654200 -0.80030000  
H -0.34660700 2.06618700 0.78954800  
H -0.36202400 -1.71644300 -1.30236100  
N -1.90139000 0.32831500 -0.51940900  
O -2.68243900 -0.77573000 -0.28916800  
O -2.43884100 1.47533300 -0.46044700  
O -1.25555500 -1.27000000 1.57445700  
H -2.17751400 -1.14814800 0.63436800  
H -1.39033900 -0.57132800 2.23275600

IM1 (Triplet, aq)

C -0.51914500 0.11575500 -0.22312700  
C 1.55081800 -1.08383800 -0.55594300  
C 2.25465600 0.03927100 -0.07900900  
C 1.56816400 1.20836900 0.29824000  
C 0.19634000 1.25806500 0.20977000

|   |             |             |             |
|---|-------------|-------------|-------------|
| H | 2.09921000  | -1.96931500 | -0.85703200 |
| H | 2.13260500  | 2.06219100  | 0.65196600  |
| O | 3.60168100  | 0.04825000  | 0.03162900  |
| H | 3.97457000  | -0.80106500 | -0.24986000 |
| C | 0.18092000  | -1.04590600 | -0.64518400 |
| H | -0.34540700 | 2.15397300  | 0.48018900  |
| H | -0.37186100 | -1.89592100 | -1.02160800 |
| N | -1.90750800 | 0.24974600  | -0.53090800 |
| O | -2.68427500 | -0.89570500 | -0.32425000 |
| O | -2.50081200 | 1.35804800  | -0.50014000 |
| O | -1.15008400 | -0.88884400 | 1.77428000  |
| H | -2.38287500 | -1.17371300 | 0.58609600  |
| H | -1.27629000 | -0.04866600 | 2.24597600  |

TS(IM1-IM2) (Triplet, aq)

|   |             |             |             |
|---|-------------|-------------|-------------|
| C | -0.51662244 | 0.03339695  | -0.07188305 |
| C | 1.56837075  | -1.17438427 | -0.38880029 |
| C | 2.27788904  | -0.01091031 | -0.02040544 |
| C | 1.59225180  | 1.18916482  | 0.25808664  |
| C | 0.22397171  | 1.22889253  | 0.19807947  |
| H | 2.11804338  | -2.07519343 | -0.63861261 |
| H | 2.16219452  | 2.07522325  | 0.50933485  |
| O | 3.62652388  | 0.01078689  | 0.05932852  |
| H | 3.99631344  | -0.85876048 | -0.15702864 |
| C | 0.20077246  | -1.15026737 | -0.45798524 |
| H | -0.31640278 | 2.14473530  | 0.39260991  |
| H | -0.35543415 | -2.02484459 | -0.76749908 |
| N | -1.86057610 | 0.18884880  | -0.58232420 |
| O | -2.69602438 | -0.91321730 | -0.34231133 |
| O | -2.41541340 | 1.31061890  | -0.67110809 |
| O | -1.19301163 | -0.47493259 | 1.70490345  |
| H | -2.44241415 | -1.15528321 | 0.58528641  |
| H | -0.47162971 | -1.05044138 | 2.00088726  |

IM2 (Triplet, aq)

|   |             |             |             |
|---|-------------|-------------|-------------|
| C | -0.61044700 | -0.08756900 | 0.39140100  |
| C | 1.50138800  | -1.19427100 | -0.34633500 |
| C | 2.21349600  | 0.00931400  | -0.13586400 |

|   |             |             |             |
|---|-------------|-------------|-------------|
| C | 1.54540200  | 1.16138800  | 0.34510600  |
| C | 0.20778800  | 1.14158200  | 0.58869500  |
| H | 2.03880600  | -2.06884400 | -0.69914600 |
| H | 2.12416300  | 2.05922800  | 0.53050400  |
| O | 3.55336500  | 0.11048600  | -0.36440700 |
| H | 3.90278200  | -0.73506600 | -0.68089400 |
| C | 0.16227200  | -1.26354500 | -0.10372600 |
| H | -0.30565100 | 2.01188600  | 0.97587000  |
| H | -0.39079800 | -2.18134700 | -0.26267200 |
| N | -1.73856300 | 0.22538900  | -0.63175800 |
| O | -2.77627700 | -0.74822400 | -0.61950300 |
| O | -2.10172200 | 1.39923800  | -0.87285700 |
| O | -1.36575400 | -0.39801100 | 1.58073400  |
| H | -2.84661500 | -1.01541700 | 0.31865300  |
| H | -0.94904100 | -1.15746700 | 2.01260200  |

P5·HONO (Singlet, aq)

|   |             |             |             |
|---|-------------|-------------|-------------|
| C | -0.15921900 | 1.53782900  | 0.01509400  |
| C | 1.23653700  | -0.00910100 | 1.23445200  |
| C | 1.88963700  | -0.35275100 | 0.05153400  |
| C | 1.51716800  | 0.24858100  | -1.15023100 |
| C | 0.49292400  | 1.19115600  | -1.16846800 |
| H | 1.52588500  | -0.48019100 | 2.16808200  |
| H | 2.02807100  | -0.02314500 | -2.06667500 |
| O | 2.91535500  | -1.28459100 | 0.01438100  |
| H | 3.08529300  | -1.61740500 | 0.90595400  |
| C | 0.21370900  | 0.93915000  | 1.21694700  |
| H | 0.19721500  | 1.66069300  | -2.09951100 |
| H | -0.29684500 | 1.20508900  | 2.13653200  |
| N | -2.00367000 | -1.40198100 | -0.61486000 |
| O | -2.86104900 | -0.88570600 | 0.36423300  |
| O | -1.21257000 | -2.13516700 | -0.14199900 |
| O | -1.17262700 | 2.48070800  | -0.06474600 |
| H | -3.45968100 | -0.29181600 | -0.12312500 |
| H | -1.55165500 | 2.62949400  | 0.81185400  |

TS(4-NP\*·2W-IM1·1W) (Triplet, aq)

|   |             |            |             |
|---|-------------|------------|-------------|
| C | -0.17565500 | 0.43389000 | -0.23532500 |
|---|-------------|------------|-------------|

|   |             |             |             |
|---|-------------|-------------|-------------|
| C | 2.04408500  | 0.96463600  | 0.57552600  |
| C | 2.54235600  | -0.17520700 | -0.09230500 |
| C | 1.67791400  | -0.99761900 | -0.84881200 |
| C | 0.34397500  | -0.69665000 | -0.93720400 |
| H | 2.72547500  | 1.58743300  | 1.14430200  |
| H | 2.08758300  | -1.85810800 | -1.36315400 |
| O | 3.84409100  | -0.52653800 | -0.04962900 |
| H | 4.35652300  | 0.09726500  | 0.48748100  |
| C | 0.71163900  | 1.27849300  | 0.49872900  |
| H | -0.32434400 | -1.30624600 | -1.52716600 |
| H | 0.31645800  | 2.15269100  | 0.99496700  |
| N | -1.48254200 | 0.88978900  | -0.50997700 |
| O | -1.92094000 | 1.97189000  | -0.00232500 |
| O | -2.31942400 | 0.08412500  | -1.18564900 |
| O | -2.84712600 | -1.61933500 | 0.43740900  |
| H | -3.66412700 | -1.41658600 | 0.91570600  |
| H | -2.68930000 | -0.82229800 | -0.39385700 |
| O | -0.89836800 | -0.75916300 | 1.65752300  |
| H | -2.00680800 | -1.33528800 | 1.06302500  |
| H | -0.15542300 | -1.38047400 | 1.62625100  |

IM1·1W (Triplet, aq)

|   |             |             |             |
|---|-------------|-------------|-------------|
| C | -0.13076700 | 0.44390200  | -0.24070300 |
| C | 2.09519000  | 0.93898000  | 0.56602900  |
| C | 2.57202400  | -0.21506000 | -0.08241800 |
| C | 1.69675300  | -1.02643600 | -0.82726500 |
| C | 0.36441800  | -0.69836300 | -0.92560200 |
| H | 2.78391500  | 1.55893200  | 1.12903900  |
| H | 2.08621200  | -1.90401600 | -1.32827000 |
| O | 3.87441800  | -0.59051300 | -0.02943700 |
| H | 4.39061800  | 0.03628500  | 0.49900500  |
| C | 0.76517500  | 1.27907300  | 0.47951800  |
| H | -0.31003100 | -1.30712800 | -1.50961300 |
| H | 0.38872200  | 2.16944600  | 0.96247200  |
| N | -1.43688100 | 0.91328000  | -0.48522200 |
| O | -1.91237000 | 1.95582100  | 0.03508900  |
| O | -2.26688100 | 0.14010100  | -1.27721100 |
| O | -3.11283200 | -1.64729400 | 0.46024300  |

H -3.89422700 -1.36027500 0.95027200  
H -2.69066300 -0.54095400 -0.66213700  
O -0.88330500 -0.69000000 1.66668100  
H -2.33828800 -1.42321600 1.03409800  
H -0.12709500 -1.29953100 1.66141400

TS(IM1·1W-IM2·1W) (Triplet, aq)

C -0.15318655 0.31438965 -0.07776415  
C 2.08387482 0.92882842 0.65861973  
C 2.61366737 -0.12831973 -0.11148447  
C 1.76696450 -0.91981914 -0.91557571  
C 0.41732867 -0.68551766 -0.93870583  
H 2.75358272 1.54889535 1.24401601  
H 2.20130121 -1.70294413 -1.52481063  
O 3.93586693 -0.41844597 -0.13464145  
H 4.43366665 0.18431389 0.43789187  
C 0.73667743 1.17657852 0.65263982  
H -0.23627554 -1.27362738 -1.56598633  
H 0.31791442 1.99319581 1.22331714  
N -1.43309454 0.86266309 -0.42131951  
O -1.97973783 1.75766672 0.27046762  
O -2.24160388 0.09716550 -1.25159421  
O -3.22154434 -1.67391467 0.46558632  
H -3.93962066 -1.33519921 1.01572199  
H -2.73298867 -0.54905055 -0.65468836  
O -0.85634291 -0.77765772 1.40338246  
H -2.38846559 -1.48775666 0.96682183  
H -0.13583566 -1.42198165 1.47685557

IM2·1W (Triplet, aq)

C -0.19300400 0.07324700 0.25393600  
C 2.09712600 1.06598400 0.39412200  
C 2.66589400 -0.16121900 -0.02106300  
C 1.83908300 -1.28239100 -0.26819300  
C 0.48603100 -1.19467100 -0.14678700  
H 2.75417700 1.89981200 0.62105700  
H 2.30431900 -2.22177900 -0.54519500  
O 4.01189000 -0.32539100 -0.17226000

|   |             |             |             |
|---|-------------|-------------|-------------|
| H | 4.47352900  | 0.50175400  | 0.02849500  |
| C | 0.74846100  | 1.20118500  | 0.52655800  |
| H | -0.14656000 | -2.05510300 | -0.31866300 |
| H | 0.31008500  | 2.13105500  | 0.86374000  |
| N | -1.16414700 | 0.51382000  | -0.84981800 |
| O | -1.67365300 | 1.66194300  | -0.80308500 |
| O | -1.98781200 | -0.51974400 | -1.33741500 |
| O | -3.82674800 | -0.72290400 | 0.63265400  |
| H | -4.43619900 | 0.02356600  | 0.70210500  |
| H | -2.76290700 | -0.57137200 | -0.70969900 |
| O | -1.08516600 | -0.13340900 | 1.38078800  |
| H | -3.10050300 | -0.51727900 | 1.24555300  |
| H | -0.61656200 | -0.68417400 | 2.02443700  |

P6·HONO·1W (Singlet, aq)

|   |             |             |             |
|---|-------------|-------------|-------------|
| C | -0.06168000 | 1.59167900  | 0.10069200  |
| C | 1.85657500  | 0.66351600  | -1.02933200 |
| C | 2.18167800  | -0.05726600 | 0.11856000  |
| C | 1.38529900  | 0.04907800  | 1.25875900  |
| C | 0.26350700  | 0.87327000  | 1.25035200  |
| H | 2.47781200  | 0.58098000  | -1.91503400 |
| H | 1.64376900  | -0.51526100 | 2.14711700  |
| O | 3.28596700  | -0.89211100 | 0.18065200  |
| H | 3.74631300  | -0.88403000 | -0.66931600 |
| C | 0.73207700  | 1.48825600  | -1.03860200 |
| H | -0.36010800 | 0.95999200  | 2.13235400  |
| H | 0.47318700  | 2.04655900  | -1.93209500 |
| N | -0.86704200 | -2.38020400 | -0.65353300 |
| O | -1.40663500 | -1.44728700 | -1.14862200 |
| O | -1.12188800 | -2.53958400 | 0.68611400  |
| O | -3.46838800 | 0.57937500  | 0.20977400  |
| H | -3.04388100 | -0.20174000 | -0.16999600 |
| H | -1.71040500 | -1.80958600 | 0.98280600  |
| O | -1.19733200 | 2.38922500  | 0.13645000  |
| H | -2.75725900 | 1.24435600  | 0.21939800  |
| H | -1.27866700 | 2.87201200  | -0.69802400 |

## S5. Supporting References

1. M. Dunn, E. Pokon, G. Shields, *J. Am. Chem. Soc.*, 2004, **126**, 2647-2653.
2. R. Crespo-Otero, M. Barbatti, *Theor. Chem. Acc.*, 2012, **131**, 1–14.
3. J. Bergsma, P. Berens, K. Wilson, D. Fredkin, E. Heller, *J. Phys. Chem.*, 1984, **88**, 612–619.
4. M. Barbatti, G. Granucci, M. Ruckebauer, F. Plasser, R. Crespo-Otero, J. Pittner, M. Persico, H. Lischka, NEWTON-X: A package for Newtonian dynamics close to the crossing seam. Version 2 2016. Available online: <http://www.newtonx.org>, (accessed on 5 May 2022).
5. M. Barbatti, M. Ruckebauer, F. Plasser, J. Pittner, G. Granucci, M. Persico, H. Lischka, *Wiley Interdiscip. Rev. Comput. Mol. Sci.*, 2014, **4**, 26–33.
6. M. Barbatti, A. Aquino, H. Lischka, *Phys. Chem. Chem. Phys.*, 2010, **12**, 4959-4967.
7. M. Sangwan, L. Zhu, *J. Phys. Chem. A*, 2018, **122**, 1861–1872.
8. M. Sangwan, L. Zhu, *J. Phys. Chem. A*, 2016, **120**, 9958–9967.
9. J. Chen, J. Wenger, D. Venables, *J. Phys. Chem. A*, 2011, **115**, 12235–12242.
10. T. Braman, L. Dolvin, C. Thrasher, H. Yu, E. Walhout, R. O’Brien, *Environ. Sci. Technol. Lett.*, 2020, **7**, 248–253.
